# Supplementary material for: Genome-Wide Analyses of Prognostic and Therapeutic Alternative Splicing Signatures in Bladder Urothelial Carcinoma
Source: Front Oncol. 2021 Mar 26;11:626858. doi: 10.3389/fonc.2021.626858 (PMC8033158; doi:10.3389/fonc.2021.626858)
Supplement: Supplementary file 4 [file Table_2.xlsx]

## Sheet: Sheet1
symbol	as_id	splice_type	P.Value	adjP.Value	FC	LogFC
ZCCHC11	ID_3007	AT	3.77195e-35	3.84814e-31	1.07955	0.110425
COPS7A	ID_19936	AT	5.55418e-34	2.83319e-30	1.00482	0.0069319
CERS5	ID_21656	AT	1.17905e-25	4.00957e-22	1.00357	0.00514729
KANSL3	ID_54541	AT	2.87807e-22	7.34052e-19	1.00782	0.0112432
COPS7B	ID_57939	AT	1.54688e-14	3.15626e-11	1.09533	0.131368
RPL7	ID_84143	AP	1.3345e-13	2.26909e-10	4.56181	2.1896
SEMA4D	ID_86805	AT	3.25464e-13	4.7434e-10	2.19668	1.13532
ADRA1A	ID_83135	AT	5.4292e-13	6.92359e-10	1.1933	0.254956
BSDC1	ID_1590	AT	1.54356e-12	1.74971e-09	1.00418	0.00601706
CLYBL	ID_26185	AT	2.37826e-12	2.21169e-09	1.40789	0.493532
BRD3	ID_88089	AT	2.38469e-12	2.21169e-09	1.00446	0.00642115
CXCL12	ID_11343	AT	2.87879e-12	2.44745e-09	0.583003	-0.778426
CXCL12	ID_11342	AT	3.20946e-12	2.51869e-09	3.05492	1.61113
NR4A1	ID_21884	AP	5.62151e-12	4.09648e-09	0.678842	-0.558852
NR4A1	ID_21887	AP	6.17507e-12	4.19987e-09	7.66242	2.9378
JAM2	ID_60253	AT	9.03518e-12	5.42217e-09	0.613891	-0.703946
JAM2	ID_60254	AT	9.03518e-12	5.42217e-09	2.48391	1.31261
DNMT3A	ID_52856	AT	2.31754e-11	1.14457e-08	1.24793	0.31954
DNMT3A	ID_52857	AT	2.31755e-11	1.14457e-08	0.218876	-2.19181
ITSN1	ID_60467	AT	2.33293e-11	1.14457e-08	4.04969	2.01781
SMTN	ID_61813	ES	2.356e-11	1.14457e-08	1.25931	0.332638
APOLD1	ID_20516	AT	3.27093e-11	1.3348e-08	0.275645	-1.85912
APOLD1	ID_20517	AT	3.27091e-11	1.3348e-08	1.47607	0.56176
FIS1	ID_81052	AP	3.04552e-11	1.3348e-08	2.7101	1.43835
FIS1	ID_81053	AP	3.04552e-11	1.3348e-08	0.949622	-0.074574
ITSN1	ID_60468	AT	3.82013e-11	1.49896e-08	0.869469	-0.201794
RPL17	ID_45479	AP	4.37395e-11	1.53873e-08	0.84672	-0.240043
DMPK	ID_50522	ES	4.34466e-11	1.53873e-08	1.82827	0.870476
RPS27A	ID_53606	RI	4.18088e-11	1.53873e-08	2.91049	1.54126
CD300LG	ID_41726	AT	5.16284e-11	1.5961e-08	1.0608	0.0851587
RPL17	ID_45481	AP	4.69462e-11	1.5961e-08	2.20706	1.14213
WHSC1	ID_68527	AT	4.94124e-11	1.5961e-08	1.10374	0.142397
EEF1D	ID_85437	AP	5.03785e-11	1.5961e-08	2.97429	1.57254
RPL28	ID_52096	AT	6.30337e-11	1.89138e-08	3.13158	1.64689
RPL28	ID_52093	AT	7.77803e-11	2.26718e-08	3.53788	1.82289
CALCOCO1	ID_22108	RI	8.23581e-11	2.33394e-08	3.6299	1.85993
ITIH5	ID_10715	AT	9.05675e-11	2.4315e-08	0.694683	-0.525574
ITIH5	ID_10716	AT	9.05675e-11	2.4315e-08	2.21552	1.14765
NTPCR	ID_10316	AT	1.07429e-10	2.73997e-08	2.5316	1.34005
NTPCR	ID_10317	AT	1.07429e-10	2.73997e-08	0.89371	-0.162122
PPIE	ID_1902	AT	1.19579e-10	2.81508e-08	0.460244	-1.11953
NDUFA3	ID_51775	AT	1.20336e-10	2.81508e-08	3.32425	1.73303
MRPL2	ID_76235	AT	1.2417e-10	2.81508e-08	0.402664	-1.31235
MRPL2	ID_76236	AT	1.2417e-10	2.81508e-08	1.14538	0.195821
SVEP1	ID_87186	AT	1.14423e-10	2.81508e-08	4.25656	2.08969
TMEM59	ID_3108	AP	1.33912e-10	2.83256e-08	4.35351	2.12218
TNFSF12	ID_38966	AT	1.38183e-10	2.83256e-08	1.8951	0.922275
TNFSF12	ID_38967	AT	1.38183e-10	2.83256e-08	0.705466	-0.503352
NDUFA3	ID_51774	AT	1.44377e-10	2.83256e-08	3.05459	1.61098
RPL34	ID_70298	AT	1.29772e-10	2.83256e-08	5.59058	2.483
ZNF318	ID_76265	AT	1.42071e-10	2.83256e-08	1.09889	0.136042
SVEP1	ID_87187	AT	1.41687e-10	2.83256e-08	0.761059	-0.393921
DMPK	ID_50519	AP	2.06087e-10	3.89351e-08	3.486	1.80157
DMPK	ID_50520	AP	2.06087e-10	3.89351e-08	0.719588	-0.474758
EEF1D	ID_85436	AP	2.19293e-10	4.06769e-08	0.904502	-0.144804
GLIPR1L2	ID_23458	AT	2.44135e-10	4.44762e-08	1.17461	0.23218
ATP5J	ID_60261	AT	2.57154e-10	4.6026e-08	1.01599	0.0228884
PPIE	ID_1901	AT	2.64081e-10	4.6451e-08	1.21122	0.276457
GSN	ID_87424	AT	3.24714e-10	5.61479e-08	0.994295	-0.00825347
PDE4DIP	ID_4412	AT	3.61529e-10	6.05965e-08	2.22626	1.15462
MSR1	ID_82778	AT	3.68259e-10	6.05965e-08	1.40004	0.485463
MSR1	ID_82779	AT	3.68259e-10	6.05965e-08	0.618548	-0.693042
HPS1	ID_12760	AT	4.18802e-10	6.61312e-08	2.0934	1.06585
HPS1	ID_12761	AT	4.188e-10	6.61312e-08	0.828168	-0.272005
RPL32	ID_63467	RI	4.21342e-10	6.61312e-08	2.13337	1.09313
ANKDD1A	ID_31137	AT	4.37108e-10	6.75663e-08	1.84592	0.884337
ATP2A2	ID_24418	RI	4.69503e-10	7.14906e-08	1.26814	0.342717
DCN	ID_23652	AT	5.24744e-10	7.75861e-08	0.943067	-0.084568
ZNF519	ID_44757	AT	5.21632e-10	7.75861e-08	2.21081	1.14458
OBSL1	ID_57728	AT	5.67907e-10	8.02185e-08	1.20681	0.271194
COL6A2	ID_60896	AT	5.81864e-10	8.02185e-08	0.595672	-0.747411
COL6A2	ID_60897	AT	5.81864e-10	8.02185e-08	1.12768	0.173353
TRIOBP	ID_62152	AT	5.74869e-10	8.02185e-08	0.870498	-0.200088
TRIOBP	ID_62153	AT	5.74869e-10	8.02185e-08	2.36192	1.23996
DUT	ID_30484	AP	6.03462e-10	8.20869e-08	0.686816	-0.542004
DUT	ID_30485	AP	6.60836e-10	8.87085e-08	2.43767	1.2855
ALDOA	ID_36035	AP	6.8092e-10	8.90222e-08	1.17005	0.226576
RAD54B	ID_84553	AT	6.89351e-10	8.90222e-08	1.42924	0.515253
RAD54B	ID_84556	AT	6.89351e-10	8.90222e-08	0.366287	-1.44895
MAGI2	ID_80218	ES	7.42552e-10	9.46939e-08	1.15448	0.207241
DIXDC1	ID_18709	AT	7.77447e-10	9.67258e-08	6.70505	2.74525
DIXDC1	ID_18710	AT	7.77447e-10	9.67258e-08	0.867551	-0.204979
NUDT22	ID_16591	AD	9.2587e-10	1.13804e-07	1.19507	0.257099
DACT3	ID_50576	AT	1.05e-09	1.26024e-07	3.24268	1.69719
DACT3	ID_50577	AT	1.05e-09	1.26024e-07	0.575113	-0.798083
EIF4E2	ID_57999	AT	1.1621e-09	1.37858e-07	0.386241	-1.37243
GABARAP	ID_38867	AD	1.21718e-09	1.42731e-07	1.82042	0.86427
RPS24	ID_12296	ES	1.26327e-09	1.46453e-07	0.604359	-0.726523
PDLIM7	ID_74777	AT	1.33268e-09	1.503e-07	2.05141	1.03662
PHF19	ID_87401	AT	1.34065e-09	1.503e-07	1.84463	0.883331
PHF19	ID_87402	AT	1.34065e-09	1.503e-07	0.516002	-0.954551
LEPR	ID_3295	AT	1.38928e-09	1.5406e-07	0.249496	-2.00291
TSSC4	ID_13923	ES	1.46535e-09	1.60747e-07	3.35607	1.74677
LEPR	ID_3297	AT	1.50954e-09	1.63834e-07	1.62074	0.696652
COX6C	ID_84676	AT	1.56418e-09	1.67976e-07	4.70539	2.23431
H2AFV	ID_79572	AT	1.65945e-09	1.76351e-07	0.421546	-1.24624
MAPKAPK2	ID_9592	AA	1.82383e-09	1.91822e-07	2.33228	1.22174
KLHDC2	ID_27443	RI	1.84548e-09	1.92118e-07	3.82135	1.93408
IPO11	ID_72190	AT	1.88944e-09	1.92761e-07	0.471929	-1.08336
IPO11	ID_72191	AT	1.88944e-09	1.92761e-07	1.1557	0.208769
MYL9	ID_59288	ES	2.00237e-09	2.02259e-07	0.975637	-0.0355833
NAP1L1	ID_23471	AT	2.10032e-09	2.0331e-07	1.63232	0.706926
DCN	ID_23655	AT	2.11241e-09	2.0331e-07	11.2707	3.4945
CEP68	ID_53777	AT	2.06377e-09	2.0331e-07	0.923833	-0.114295
CEP68	ID_53779	AT	2.06377e-09	2.0331e-07	2.47343	1.30651
RPL15	ID_63732	AD	2.07601e-09	2.0331e-07	1.74424	0.802595
PBX1	ID_8787	AT	2.18845e-09	2.0866e-07	0.960391	-0.0583068
ZNF670	ID_10509	AT	2.27673e-09	2.15067e-07	5.15998	2.36736
UBA52	ID_48467	AP	2.44305e-09	2.2866e-07	6.68371	2.74065
NECAB3	ID_59006	RI	2.54857e-09	2.34245e-07	2.5008	1.32239
DENND1A	ID_87515	AT	2.54864e-09	2.34245e-07	2.6162	1.38747
OBSL1	ID_57729	AT	2.62416e-09	2.36918e-07	0.42683	-1.22827
PDLIM7	ID_74778	AT	2.60895e-09	2.36918e-07	0.852566	-0.230116
ZNF670	ID_10507	AT	2.66699e-09	2.38672e-07	0.745553	-0.423618
DENND5B	ID_20993	AT	2.89658e-09	2.51342e-07	4.2345	2.08219
DENND5B	ID_20994	AT	2.89658e-09	2.51342e-07	0.843459	-0.24561
MPHOSPH8	ID_25400	AT	2.93174e-09	2.51342e-07	0.865199	-0.208896
MPHOSPH8	ID_25401	AT	2.91473e-09	2.51342e-07	1.81966	0.863669
TIA1	ID_53869	AT	2.89762e-09	2.51342e-07	3.16614	1.66273
CIRBP	ID_46423	RI	2.98341e-09	2.5364e-07	1.36235	0.446096
DENND1A	ID_87514	AT	3.18055e-09	2.68165e-07	0.866105	-0.207387
H2AFV	ID_79570	AT	3.21772e-09	2.69076e-07	1.30714	0.386411
HNRNPDL	ID_69705	ES	3.67696e-09	3.04979e-07	2.28367	1.19135
RCAN1	ID_60494	AP	3.78476e-09	3.06445e-07	0.545829	-0.873479
ABCB5	ID_78911	AT	3.76221e-09	3.06445e-07	1.39188	0.477036
CNOT4	ID_81886	AT	3.7623e-09	3.06445e-07	0.420811	-1.24876
BOD1	ID_74584	ES	3.87436e-09	3.1123e-07	1.03371	0.0478283
INTS3	ID_7758	RI	4.12698e-09	3.28933e-07	3.17459	1.66657
TRMT11	ID_77431	AT	4.79223e-09	3.78994e-07	1.01562	0.0223624
BLOC1S1	ID_22229	AP	4.90546e-09	3.82027e-07	0.950215	-0.0736745
BLOC1S1	ID_22230	AP	4.90544e-09	3.82027e-07	2.48132	1.31111
SPECC1	ID_39790	AT	5.34679e-09	4.07074e-07	1.2831	0.359637
SPECC1	ID_39792	AT	5.34679e-09	4.07074e-07	0.757568	-0.400553
RPL27	ID_41171	AP	5.3433e-09	4.07074e-07	0.987855	-0.0176284
SMARCC2	ID_22391	AD	5.56438e-09	4.20502e-07	1.45072	0.536767
BBS5	ID_55864	AT	5.92205e-09	4.44241e-07	1.19159	0.252885
FASTK	ID_82335	RI	6.23948e-09	4.64636e-07	2.71954	1.44336
CYB561A3	ID_16164	AA	6.38376e-09	4.71935e-07	0.491328	-1.02524
FAM102B	ID_3940	AT	6.75803e-09	4.8554e-07	3.48115	1.79956
FAM102B	ID_3941	AT	6.75803e-09	4.8554e-07	0.862827	-0.212857
EIF4E2	ID_58000	AT	6.75788e-09	4.8554e-07	1.24052	0.310939
RPL32	ID_63468	RI	6.75816e-09	4.8554e-07	2.54089	1.34533
VWA5A	ID_19211	AT	7.4441e-09	5.23125e-07	1.64641	0.719323
VWA5A	ID_19212	AT	7.4441e-09	5.23125e-07	0.707493	-0.499212
GTF2IRD2	ID_80091	AT	7.36007e-09	5.23125e-07	0.563815	-0.826707
CROT	ID_80322	AT	7.4864e-09	5.23125e-07	0.888352	-0.170796
CACNB1	ID_40626	AT	7.69603e-09	5.26946e-07	1.25574	0.328534
CACNB1	ID_40627	AT	7.69603e-09	5.26946e-07	0.365061	-1.45379
STRA13	ID_44264	AD	7.65806e-09	5.26946e-07	2.12964	1.09061
2021-09-08	ID_73300	AT	7.87783e-09	5.32249e-07	0.315898	-1.66247
PKM	ID_203434	ME	7.83198e-09	5.32249e-07	0.256558	-1.96264
ABHD11	ID_80027	ES	8.15259e-09	5.47189e-07	1.06151	0.0861214
KIF4A	ID_89372	AT	8.62596e-09	5.71442e-07	0.298225	-1.74553
KIF4A	ID_89373	AT	8.62596e-09	5.71442e-07	1.71701	0.779897
NPIPA5	ID_34150	ES	8.97449e-09	5.90695e-07	1.59199	0.670833
ATP5C1	ID_10726	ES	9.12678e-09	5.96868e-07	1.19319	0.254828
2021-09-08	ID_73299	AT	9.65644e-09	6.27484e-07	1.1234	0.167878
TAF8	ID_76164	AT	9.76637e-09	6.30611e-07	0.507499	-0.978523
FKBP8	ID_48445	AP	9.90924e-09	6.35812e-07	1.08247	0.11433
FILIP1L	ID_65811	AT	1.00458e-08	6.40542e-07	4.73148	2.24229
FILIP1L	ID_65812	AT	1.08691e-08	6.88737e-07	0.932982	-0.100079
NPM1	ID_74519	AT	1.0992e-08	6.91852e-07	0.940592	-0.0883584
NPM1	ID_74520	AT	1.10539e-08	6.91852e-07	1.87613	0.907757
NDUFC1	ID_70618	AP	1.16259e-08	7.23216e-07	1.83074	0.872423
ARL6IP4	ID_25024	RI	1.1957e-08	7.34612e-07	2.49756	1.32052
LARP6	ID_31442	AT	1.20251e-08	7.34612e-07	0.642512	-0.638204
LARP6	ID_31443	AT	1.20251e-08	7.34612e-07	1.8533	0.890095
AP1S2	ID_88569	AT	1.24361e-08	7.55198e-07	2.42553	1.2783
PPP1R12B	ID_9413	AT	1.30876e-08	7.84641e-07	0.930979	-0.10318
PPP1R12B	ID_9414	AT	1.30876e-08	7.84641e-07	14.4925	3.85724
FAM72A	ID_9577	AT	1.31517e-08	7.84641e-07	0.369123	-1.43783
PIGX	ID_68257	AT	1.46224e-08	8.62156e-07	0.934955	-0.0970308
PIGX	ID_68258	AT	1.46224e-08	8.62156e-07	2.01496	1.01075
KRBOX4	ID_88888	AT	1.47045e-08	8.62156e-07	2.10201	1.07177
TPM1	ID_30985	AT	1.48671e-08	8.66707e-07	0.974102	-0.0378558
FAM72A	ID_9578	AT	1.49524e-08	8.66732e-07	1.69858	0.764329
NSFL1C	ID_58506	ES	1.68934e-08	9.7371e-07	0.219252	-2.18934
DENND2A	ID_82008	AT	1.70867e-08	9.73844e-07	2.05106	1.03637
DENND2A	ID_82009	AT	1.70867e-08	9.73844e-07	0.668325	-0.581377
RPS21	ID_60067	AP	1.76427e-08	9.99949e-07	0.997292	-0.00391177
AP1S2	ID_88571	AT	1.87743e-08	1.0582e-06	0.732627	-0.448849
PCM1	ID_82834	AT	1.97289e-08	1.1059e-06	0.972299	-0.0405281
UBA52	ID_48469	AP	2.02843e-08	1.13082e-06	4.5215	2.1768
ODF2L	ID_3668	AT	2.0737e-08	1.13741e-06	1.30856	0.38798
NUTF2	ID_37145	AP	2.0737e-08	1.13741e-06	0.546121	-0.872708
NUTF2	ID_37146	AP	2.0737e-08	1.13741e-06	1.21141	0.27669
KIAA0513	ID_37877	AT	2.16728e-08	1.1761e-06	2.92482	1.54835
KIAA0513	ID_37878	AT	2.16728e-08	1.1761e-06	0.789579	-0.340845
TBRG4	ID_79586	ES	2.20324e-08	1.18928e-06	1.13534	0.183126
SMARCA4	ID_47612	ES	2.23997e-08	1.20274e-06	0.650818	-0.619674
ANKDD1A	ID_31138	AT	2.31525e-08	1.23022e-06	0.795559	-0.329959
PALLD	ID_71125	AT	2.31453e-08	1.23022e-06	0.971613	-0.0415466
AZI2	ID_63793	AT	2.3929e-08	1.25837e-06	1.49145	0.576711
AZI2	ID_63794	AT	2.3929e-08	1.25837e-06	0.493512	-1.01884
NARF	ID_44399	ES	2.45888e-08	1.2802e-06	4.73886	2.24454
C5orf45	ID_74948	RI	2.4595e-08	1.2802e-06	1.77754	0.829884
SCP2	ID_3045	ES	2.74445e-08	1.42126e-06	1.58881	0.667948
ZNF571	ID_49547	AT	2.946e-08	1.51793e-06	1.16237	0.217066
KRT222	ID_40884	AT	3.00098e-08	1.53849e-06	1.02222	0.0317111
SLC3A2	ID_16464	AP	3.028e-08	1.54458e-06	0.870502	-0.200081
PHF14	ID_78800	AT	3.21495e-08	1.62371e-06	1.19849	0.261223
PHF14	ID_78801	AT	3.21495e-08	1.62371e-06	0.424336	-1.23672
FANCD2	ID_63304	AT	3.37631e-08	1.6968e-06	0.352353	-1.50491
SUPT16H	ID_26572	AT	3.43078e-08	1.71573e-06	0.985643	-0.0208628
ARHGEF39	ID_86271	AT	3.4884e-08	1.72761e-06	0.701766	-0.510937
ARHGEF39	ID_86272	AT	3.4884e-08	1.72761e-06	1.60277	0.680572
SAT2	ID_39030	AD	3.58381e-08	1.76628e-06	2.44365	1.28904
ATXN2L	ID_35845	RI	3.72325e-08	1.82618e-06	1.16487	0.220167
FAH	ID_32177	AP	3.89328e-08	1.90044e-06	2.67845	1.4214
PAQR3	ID_69649	AT	3.95e-08	1.91895e-06	2.11177	1.07846
SCRN2	ID_42122	AA	3.99459e-08	1.93141e-06	2.7401	1.45423
VSTM4	ID_11498	AT	4.30889e-08	2.06382e-06	0.796278	-0.328656
VSTM4	ID_11499	AT	4.30889e-08	2.06382e-06	2.70106	1.43353
RPL6	ID_24584	AD	4.54766e-08	2.168e-06	2.59349	1.37489
MARK3	ID_29448	ES	4.57218e-08	2.16955e-06	0.358862	-1.4785
RBM3	ID_88998	RI	4.64667e-08	2.19469e-06	3.14699	1.65397
KRBOX4	ID_88886	AT	4.79929e-08	2.25633e-06	0.884019	-0.177851
TACC2	ID_13344	ES	4.90237e-08	2.27388e-06	1.88326	0.913234
FOS	ID_28490	AP	4.90349e-08	2.27388e-06	0.92194	-0.117255
ITFG3	ID_32854	AT	4.88346e-08	2.27388e-06	1.01047	0.0150334
FOS	ID_28489	AP	5.11887e-08	2.35247e-06	4.41161	2.14131
GTF2IRD2	ID_80092	AT	5.11907e-08	2.35247e-06	1.5612	0.642656
C14orf159	ID_28841	AT	5.42983e-08	2.46201e-06	0.956257	-0.0645304
C14orf159	ID_28842	AT	5.42984e-08	2.46201e-06	2.70306	1.4346
CIRBP	ID_46424	RI	5.4225e-08	2.46201e-06	1.13469	0.182296
PTGER3	ID_3412	AT	5.51623e-08	2.48488e-06	0.358761	-1.47891
NPIPA5	ID_34149	AD	5.5777e-08	2.48488e-06	1.83707	0.877409
ENDOV	ID_44054	AT	5.57764e-08	2.48488e-06	0.444613	-1.16938
NDUFS7	ID_46465	RI	5.54208e-08	2.48488e-06	1.52673	0.610445
PRRG1	ID_88777	AT	5.66782e-08	2.50317e-06	2.41672	1.27305
PRRG1	ID_88778	AT	5.66782e-08	2.50317e-06	0.891613	-0.16551
HDAC4	ID_58232	AT	5.75958e-08	2.52185e-06	0.848542	-0.236942
HDAC4	ID_58233	AT	5.75958e-08	2.52185e-06	3.43407	1.77992
TAF1D	ID_18320	AA	5.85269e-08	2.55167e-06	1.60479	0.682383
PLAUR	ID_50230	AT	5.94723e-08	2.56007e-06	0.931761	-0.101969
PLAUR	ID_50231	AT	5.94723e-08	2.56007e-06	1.8526	0.889554
WDPCP	ID_53729	AT	5.94631e-08	2.56007e-06	1.05022	0.0706849
KCNMB1	ID_74497	AT	5.9782e-08	2.56259e-06	0.962526	-0.0551031
POMGNT1	ID_2783	AP	6.01131e-08	2.566e-06	0.499289	-1.00205
PDLIM7	ID_74781	AA	6.07584e-08	2.58274e-06	2.09358	1.06597
PCGF5	ID_12509	AT	6.14127e-08	2.58898e-06	1.86452	0.898804
PCGF5	ID_12510	AT	6.14128e-08	2.58898e-06	0.610723	-0.711409
PCNP	ID_65963	AA	6.27369e-08	2.63392e-06	1.23581	0.305463
EEF1D	ID_85441	AD	6.30293e-08	2.63535e-06	0.991747	-0.0119553
RTFDC1	ID_59880	AT	6.68036e-08	2.78176e-06	0.992543	-0.0107984
POMGNT1	ID_2781	AP	6.9051e-08	2.86365e-06	1.59869	0.676894
MAF1	ID_85532	AP	6.9784e-08	2.87071e-06	0.935968	-0.0954686
MAF1	ID_85533	AP	6.9784e-08	2.87071e-06	3.03393	1.60119
RPL27A	ID_14255	AA	7.69096e-08	3.10067e-06	0.99806	-0.00280186
GNB5	ID_30638	AT	7.59703e-08	3.10067e-06	0.965226	-0.0510617
CRELD1	ID_63289	ES	7.71976e-08	3.10067e-06	2.14566	1.10142
RIC1	ID_85794	AT	7.63829e-08	3.10067e-06	0.9205	-0.11951
RIC1	ID_85795	AT	7.63829e-08	3.10067e-06	2.87204	1.52208
PHPT1	ID_88225	ES	7.67906e-08	3.10067e-06	2.31028	1.20807
GRHPR	ID_86400	AP	7.96825e-08	3.18793e-06	0.961791	-0.0562047
CCND3	ID_76156	AP	8.18319e-08	3.26113e-06	0.611677	-0.709157
SOD2	ID_78304	RI	8.22632e-08	3.26556e-06	0.892012	-0.164865
GFOD2	ID_37098	AT	8.31386e-08	3.27483e-06	1.21944	0.286214
GFOD2	ID_37099	AT	8.31386e-08	3.27483e-06	0.691218	-0.532788
TRAPPC4	ID_19059	AT	8.81117e-08	3.43098e-06	0.926044	-0.110848
TRAPPC4	ID_19060	AT	8.81117e-08	3.43098e-06	1.37495	0.459378
ABCF2	ID_82355	AT	8.7635e-08	3.43098e-06	1.05452	0.0765852
FOSB	ID_50450	AT	8.90439e-08	3.45409e-06	0.933263	-0.0996444
FOSB	ID_50451	AT	8.95153e-08	3.45922e-06	4.63978	2.21406
ENDOV	ID_44053	AT	9.04717e-08	3.48299e-06	1.68755	0.754933
RCAN1	ID_60491	AP	9.43683e-08	3.61934e-06	2.00976	1.00702
ZNHIT3	ID_40478	ES	9.52684e-08	3.64018e-06	1.06138	0.0859411
RELA	ID_16898	RI	9.79092e-08	3.72712e-06	2.54725	1.34894
BTNL9	ID_75037	AT	9.84277e-08	3.73293e-06	0.563736	-0.826909
TGIF1	ID_44503	AP	9.89454e-08	3.73867e-06	2.25527	1.1733
PPCS	ID_2075	AD	9.94672e-08	3.74452e-06	1.39623	0.48154
TBC1D7	ID_75375	AT	1.00508e-07	3.7698e-06	1.07033	0.0980543
ALS2	ID_56916	AT	1.02115e-07	3.80212e-06	0.692961	-0.529153
ALS2	ID_56917	AT	1.02115e-07	3.80212e-06	1.16705	0.222864
C16orf13	ID_32921	ES	1.06991e-07	3.96915e-06	0.869139	-0.202342
INADL	ID_3237	AT	1.08187e-07	3.99898e-06	2.19156	1.13196
NEK2	ID_9717	AT	1.13413e-07	4.14709e-06	1.61726	0.69355
NEK2	ID_9718	AT	1.13413e-07	4.14709e-06	0.398267	-1.32819
C12orf76	ID_24405	AT	1.13411e-07	4.14709e-06	0.549382	-0.864118
SH2B1	ID_35867	AP	1.17044e-07	4.2494e-06	1.23569	0.305318
TAF9	ID_72343	AP	1.17026e-07	4.2494e-06	0.5196	-0.944528
PSIP1	ID_85919	AT	1.20132e-07	4.3307e-06	0.827428	-0.273295
PSIP1	ID_85920	AT	1.20132e-07	4.3307e-06	1.66016	0.73132
FANCL	ID_53651	AT	1.22027e-07	4.36813e-06	0.526122	-0.92653
FANCL	ID_53652	AT	1.22027e-07	4.36813e-06	1.14899	0.200372
CIRBP	ID_46432	RI	1.25913e-07	4.49147e-06	2.07227	1.05122
LTBP3	ID_16862	AP	1.3128e-07	4.66662e-06	0.597892	-0.742044
CLDND1	ID_65752	AT	1.34012e-07	4.74718e-06	1.05309	0.0746243
FAM206A	ID_87149	AT	1.347e-07	4.75506e-06	1.05874	0.0823509
POM121	ID_79927	AT	1.36153e-07	4.77332e-06	0.8172	-0.291238
POM121	ID_79928	AT	1.36153e-07	4.77332e-06	1.62501	0.700452
C16orf13	ID_32924	ES	1.4047e-07	4.85797e-06	0.882079	-0.18102
CLDN11	ID_67616	AT	1.40473e-07	4.85797e-06	0.515604	-0.955664
CLDN11	ID_67617	AT	1.40473e-07	4.85797e-06	1.96079	0.971434
GRIK2	ID_77097	AT	1.40404e-07	4.85797e-06	1.19525	0.25731
TIMP1	ID_88929	ES	1.43685e-07	4.95229e-06	1.00546	0.00785313
COMMD5	ID_85671	AP	1.45661e-07	4.9867e-06	1.15517	0.2081
COMMD5	ID_85672	AP	1.45661e-07	4.9867e-06	0.55337	-0.853685
TCAIM	ID_64358	AT	1.47197e-07	4.98905e-06	0.556912	-0.844478
TCAIM	ID_64359	AT	1.47197e-07	4.98905e-06	1.55304	0.635095
NOP16	ID_74647	AT	1.46381e-07	4.98905e-06	1.02256	0.0321874
BCAT2	ID_50816	ES	1.59097e-07	5.35678e-06	2.65135	1.40673
C7orf55-LUC7L2	ID_81954	AP	1.59096e-07	5.35678e-06	3.26246	1.70596
SYNGR1	ID_62299	AT	1.59929e-07	5.3671e-06	0.577011	-0.793329
HYPK	ID_30317	AP	1.63036e-07	5.42582e-06	4.35809	2.1237
NISCH	ID_65220	AT	1.63275e-07	5.42582e-06	1.47498	0.560698
NISCH	ID_65221	AT	1.63275e-07	5.42582e-06	0.875137	-0.192418
CCDC115	ID_55334	ES	1.6929e-07	5.60746e-06	1.9689	0.977392
RPS4X	ID_89449	AT	1.71559e-07	5.66421e-06	0.995273	-0.00683512
BTNL9	ID_75035	AT	1.78269e-07	5.86678e-06	1.73832	0.797697
INF2	ID_29547	ES	1.88647e-07	6.11046e-06	1.14571	0.196243
PRKCA	ID_43100	AT	1.88668e-07	6.11046e-06	0.823481	-0.280194
PRKCA	ID_43101	AT	1.88668e-07	6.11046e-06	2.4151	1.27209
SMIM11	ID_60479	AT	1.88663e-07	6.11046e-06	1.14684	0.197669
SMIM11	ID_60480	AT	1.88663e-07	6.11046e-06	0.593705	-0.752182
SLC39A1	ID_7764	AP	1.90614e-07	6.15395e-06	0.892678	-0.163789
POLL	ID_12886	RI	1.91568e-07	6.16524e-06	2.54877	1.3498
ERCC1	ID_50438	AP	1.97614e-07	6.3398e-06	1.53828	0.621316
ZNF808	ID_51467	AT	2.00679e-07	6.39791e-06	0.731019	-0.452019
ZNF808	ID_51468	AT	2.00679e-07	6.39791e-06	1.28806	0.365201
ZNF771	ID_36107	AT	2.01704e-07	6.41055e-06	0.308739	-1.69554
USP4	ID_64852	AT	2.03788e-07	6.45666e-06	2.19454	1.13392
NGFRAP1	ID_89730	AP	2.07999e-07	6.56969e-06	0.958909	-0.0605338
C1orf54	ID_7454	AP	2.18048e-07	6.8447e-06	0.337585	-1.56668
C1orf54	ID_7455	AP	2.18048e-07	6.8447e-06	1.53049	0.613995
FAM98B	ID_29919	AT	2.20089e-07	6.84558e-06	0.949088	-0.0753864
FAM98B	ID_29920	AT	2.20089e-07	6.84558e-06	1.86956	0.902696
ERCC1	ID_50439	AP	2.18979e-07	6.84558e-06	0.610009	-0.713097
HBEGF	ID_73649	RI	2.2113e-07	6.85704e-06	1.00033	0.000476323
NAA60	ID_33528	RI	2.24657e-07	6.94532e-06	0.64164	-0.640164
RPL23	ID_40601	AP	2.31218e-07	7.12655e-06	0.997762	-0.00323281
SNRPA1	ID_32758	ES	2.34021e-07	7.18545e-06	1.10283	0.141211
PCDHA9	ID_73784	AT	2.35242e-07	7.18545e-06	0.645527	-0.631451
PCDHA9	ID_73785	AT	2.35242e-07	7.18545e-06	2.87506	1.52359
ARL17B	ID_42016	AT	2.37657e-07	7.19459e-06	0.771109	-0.374993
C19orf48	ID_51219	AP	2.37585e-07	7.19459e-06	3.39182	1.76206
C19orf48	ID_51221	AP	2.37585e-07	7.19459e-06	0.880945	-0.182876
PPP3CB	ID_12153	AT	2.40102e-07	7.22573e-06	0.684928	-0.545976
PPP3CB	ID_12154	AT	2.40102e-07	7.22573e-06	1.70858	0.7728
CIRBP	ID_46430	ES	2.42567e-07	7.27842e-06	0.79883	-0.32404
DDX23	ID_21484	ES	2.46843e-07	7.36342e-06	1.00621	0.0089353
NDUFC1	ID_70617	AP	2.46286e-07	7.36342e-06	0.645083	-0.632444
SYNCRIP	ID_76933	AT	2.59196e-07	7.66468e-06	1.41087	0.496584
SYNCRIP	ID_76934	AT	2.59196e-07	7.66468e-06	0.812637	-0.299316
RBPMS	ID_83289	AT	2.59193e-07	7.66468e-06	1.20466	0.268625
NOP16	ID_74652	ES	2.60282e-07	7.67457e-06	1.00302	0.00435267
2021-09-15	ID_3687	ES	2.645e-07	7.77646e-06	0.966411	-0.0492912
RPL14	ID_64220	AD	2.67217e-07	7.83376e-06	2.29332	1.19744
SCLY	ID_58198	AT	2.69974e-07	7.84695e-06	0.835257	-0.259708
SCLY	ID_58199	AT	2.69974e-07	7.84695e-06	2.1366	1.09532
RPL30	ID_84636	ES	2.69971e-07	7.84695e-06	0.705654	-0.502966
RPS3A	ID_70819	AT	2.83272e-07	8.21006e-06	0.996603	-0.00490918
RPS27L	ID_31014	AP	2.8547e-07	8.22335e-06	0.959778	-0.059227
COX6C	ID_84681	AT	2.86949e-07	8.22335e-06	3.59257	1.84502
FAM120C	ID_89237	AT	2.86955e-07	8.22335e-06	1.64447	0.717619
FAM120C	ID_89238	AT	2.86955e-07	8.22335e-06	0.547965	-0.867845
OGG1	ID_63158	AT	2.89878e-07	8.2607e-06	0.655017	-0.610396
OGG1	ID_63159	AT	2.89877e-07	8.2607e-06	1.23548	0.305075
TPM4	ID_48124	AP	3.01887e-07	8.55515e-06	0.494128	-1.01704
TPM4	ID_48125	AP	3.01887e-07	8.55515e-06	2.45735	1.29711
PTS	ID_18764	ES	3.05722e-07	8.63983e-06	1.27822	0.354139
CREM	ID_11237	AT	3.09629e-07	8.72606e-06	0.780809	-0.356958
ANXA6	ID_74154	ES	3.10724e-07	8.73281e-06	1.00019	0.000267553
PGAM5	ID_25293	AT	3.12685e-07	8.76376e-06	0.983722	-0.0236768
SLC39A8	ID_70107	AT	3.15686e-07	8.82363e-06	1.0163	0.0233194
TM4SF19	ID_68238	AT	3.17551e-07	8.85152e-06	0.740988	-0.432477
NR2C1	ID_23741	AT	3.24057e-07	8.98377e-06	1.80362	0.850895
NR2C1	ID_23742	AT	3.24057e-07	8.98377e-06	0.861382	-0.215274
CCND3	ID_76154	AP	3.27354e-07	9.05058e-06	1.78375	0.834911
ARL1	ID_23946	AT	3.3214e-07	9.15784e-06	0.991234	-0.012703
CIRBP	ID_46441	RI	3.34012e-07	9.15784e-06	1.65285	0.724952
STX10	ID_47925	RI	3.34021e-07	9.15784e-06	2.11789	1.08263
STAT1	ID_56594	AT	3.35721e-07	9.15784e-06	0.877054	-0.189263
STAT1	ID_56595	AT	3.35721e-07	9.15784e-06	2.09244	1.06519
TRIM16	ID_39365	ES	3.39688e-07	9.24133e-06	1.00964	0.0138377
ATXN2L	ID_35834	RI	3.40793e-07	9.24672e-06	1.07915	0.109895
ABCA9	ID_43157	AT	3.63916e-07	9.77071e-06	0.881434	-0.182076
ABCA9	ID_43158	AT	3.63916e-07	9.77071e-06	2.59795	1.37737
GULP1	ID_56499	AT	3.63936e-07	9.77071e-06	2.22458	1.15353
GULP1	ID_56500	AT	3.63936e-07	9.77071e-06	0.782433	-0.35396
SSR4	ID_90498	AP	3.67599e-07	9.84316e-06	1.21535	0.281375
PPP2R5C	ID_29317	AT	3.69477e-07	9.86756e-06	1.60895	0.686122
ABCB5	ID_78910	AT	3.73141e-07	9.93939e-06	0.650831	-0.619644
GTF2I	ID_80086	AT	3.85204e-07	1.0234e-05	0.997774	-0.00321443
C16orf13	ID_32919	ES	4.02179e-07	1.06572e-05	0.927071	-0.109248
HNRNPA1	ID_22147	ES	4.0853e-07	1.07975e-05	0.85763	-0.221573
LMCD1	ID_63051	AT	4.29603e-07	1.13251e-05	1.00849	0.0121991
RPS14	ID_74089	AP	4.42186e-07	1.16268e-05	1.00445	0.00640735
NUDT22	ID_16589	RI	4.51554e-07	1.18122e-05	0.732699	-0.448707
CD74	ID_74081	ES	4.5126e-07	1.18122e-05	1.01072	0.0153866
LTBP3	ID_16864	AP	4.72317e-07	1.22962e-05	2.30296	1.20349
TUBGCP3	ID_26302	AT	4.73674e-07	1.22962e-05	3.72732	1.89814
TUBGCP3	ID_26303	AT	4.73674e-07	1.22962e-05	0.95044	-0.073333
TMEM201	ID_564	AT	4.79437e-07	1.23828e-05	1.24541	0.316618
TMEM201	ID_565	AT	4.79437e-07	1.23828e-05	0.660898	-0.597502
FLCN	ID_39460	AT	4.84239e-07	1.24438e-05	1.89797	0.924457
FLCN	ID_39461	AT	4.84238e-07	1.24438e-05	0.919643	-0.120855
METTL17	ID_26476	RI	4.89089e-07	1.25369e-05	2.1244	1.08706
RPLP0	ID_24722	AP	5.13999e-07	1.31424e-05	0.969269	-0.0450304
RCAN1	ID_60488	AP	5.19144e-07	1.32408e-05	3.37556	1.75513
COA6	ID_10335	AP	5.21767e-07	1.32415e-05	1.08727	0.120711
COA6	ID_10336	AP	5.21767e-07	1.32415e-05	0.619781	-0.69017
TCF3	ID_46539	RI	5.27006e-07	1.33412e-05	0.889095	-0.16959
CAMKK2	ID_24849	AT	5.45619e-07	1.37442e-05	0.487821	-1.03558
RPL38	ID_43228	AT	5.45352e-07	1.37442e-05	0.989634	-0.0150326
GRIK2	ID_77096	AT	5.50859e-07	1.3842e-05	0.391747	-1.35201
RBPMS	ID_83290	AT	5.59355e-07	1.4021e-05	0.645987	-0.630423
PSMG4	ID_75169	AP	5.66847e-07	1.4174e-05	1.00546	0.00785294
TIA1	ID_53868	AT	5.87768e-07	1.46611e-05	0.914615	-0.128764
ACTA2	ID_12473	AP	6.05421e-07	1.5028e-05	6.03135	2.59248
ACTA2	ID_12474	AP	6.05423e-07	1.5028e-05	0.953741	-0.0683312
PSMC5	ID_43010	AA	6.14515e-07	1.52167e-05	4.29049	2.10114
HYKK	ID_32099	AT	6.26802e-07	1.54834e-05	1.89299	0.920665
GRK6	ID_74762	AT	6.48797e-07	1.5988e-05	2.44468	1.28965
RPS7	ID_52570	AT	6.63909e-07	1.6321e-05	0.995636	-0.00630919
NR2C2AP	ID_48614	ES	6.71482e-07	1.64674e-05	1.08493	0.117603
PTGER3	ID_3416	AT	6.74953e-07	1.65129e-05	2.39442	1.25967
CAMKK2	ID_24851	AT	6.78238e-07	1.6514e-05	1.07595	0.105604
LAMA4	ID_77296	AT	6.78195e-07	1.6514e-05	0.613473	-0.704928
CDH23	ID_12060	AT	6.81627e-07	1.6557e-05	0.525371	-0.928591
CREM	ID_11238	AT	6.85003e-07	1.65602e-05	1.71667	0.779616
NCBP2	ID_68272	AD	6.8497e-07	1.65602e-05	0.559139	-0.83872
LPP	ID_68087	AT	6.95072e-07	1.67639e-05	0.976287	-0.0346228
FAM122B	ID_90156	AA	6.9847e-07	1.68061e-05	1.07973	0.110669
TGIF1	ID_44498	AP	7.30224e-07	1.75288e-05	1.70506	0.769819
CCDC66	ID_65341	AT	7.33813e-07	1.75736e-05	1.5481	0.6305
HYPK	ID_30319	AP	7.51205e-07	1.7948e-05	3.10283	1.63358
ANXA11	ID_12345	AP	7.58168e-07	1.80593e-05	0.982521	-0.0254394
DPAGT1	ID_19112	RI	7.59405e-07	1.80593e-05	2.11187	1.07852
LIMS1	ID_54889	AT	7.70587e-07	1.82826e-05	1.05209	0.0732533
CDC16	ID_26405	RI	7.74488e-07	1.83325e-05	0.922922	-0.115719
SEC14L1	ID_43703	AP	7.97619e-07	1.88364e-05	1.56142	0.64286
GGPS1	ID_10344	AP	8.09406e-07	1.90266e-05	0.877467	-0.188583
MFGE8	ID_32404	ES	8.08666e-07	1.90266e-05	0.973762	-0.0383589
CRAT	ID_87825	AT	8.21304e-07	1.92619e-05	0.966625	-0.048972
CRAT	ID_87824	AT	8.2533e-07	1.9312e-05	2.60901	1.3835
FANCD2	ID_63307	AT	8.37575e-07	1.95536e-05	1.22411	0.291732
UBE2D3	ID_70122	AP	8.41604e-07	1.96029e-05	2.73897	1.45363
RPL34	ID_70300	AT	8.54127e-07	1.98492e-05	3.25218	1.70141
MXRA7	ID_43608	AP	8.58304e-07	1.99009e-05	0.816244	-0.292928
SNRPB	ID_58542	AA	8.92473e-07	2.06463e-05	0.927862	-0.108018
CX3CL1	ID_36540	AP	9.1004e-07	2.09576e-05	0.812208	-0.300079
CX3CL1	ID_36541	AP	9.1004e-07	2.09576e-05	2.70548	1.43588
ACAA1	ID_64019	RI	9.27939e-07	2.13217e-05	2.13313	1.09297
CENPN	ID_37739	AT	9.41617e-07	2.13951e-05	0.702165	-0.510117
TMEM145	ID_50151	AT	9.39482e-07	2.13951e-05	3.39967	1.7654
TMEM145	ID_50152	AT	9.39482e-07	2.13951e-05	0.73287	-0.448371
RPL15	ID_63727	AP	9.4148e-07	2.13951e-05	0.975107	-0.036368
2021-09-11	ID_69616	AT	9.36978e-07	2.13951e-05	1.1192	0.162471
ZNF154	ID_52329	RI	9.88696e-07	2.24148e-05	1.22895	0.297425
USP33	ID_3534	ES	1.01784e-06	2.30244e-05	1.15248	0.204743
ANKMY1	ID_58250	AT	1.02767e-06	2.31954e-05	0.674269	-0.568604
ZNF519	ID_44756	AT	1.03267e-06	2.32567e-05	0.712889	-0.48825
NACA	ID_22502	AD	1.03758e-06	2.33159e-05	1.56572	0.646825
MRPL24	ID_8316	AD	1.07344e-06	2.40158e-05	1.19532	0.257402
RBM42	ID_49234	ES	1.07204e-06	2.40158e-05	0.984051	-0.0231949
TPM1	ID_30979	AP	1.09979e-06	2.45515e-05	0.691257	-0.532706
FBLN1	ID_62666	AT	1.11585e-06	2.48556e-05	0.60454	-0.726089
NDUFA12	ID_23737	ES	1.121e-06	2.4916e-05	0.984248	-0.0229069
ST7L	ID_4207	AT	1.13207e-06	2.50545e-05	1.99961	0.99972
GGPS1	ID_10346	AP	1.13214e-06	2.50545e-05	1.66057	0.73168
MXRA7	ID_43610	AP	1.15982e-06	2.56113e-05	2.22706	1.15514
PARD3	ID_11207	AT	1.17109e-06	2.5707e-05	1.55744	0.639179
PHB2	ID_20047	ES	1.17619e-06	2.5707e-05	1.00878	0.012612
NLRC5	ID_36514	AT	1.1755e-06	2.5707e-05	0.97622	-0.0347222
CENPN	ID_37740	AT	1.17675e-06	2.5707e-05	1.37947	0.464115
ANXA5	ID_70490	ES	1.16892e-06	2.5707e-05	1.00151	0.00217429
LRRC1	ID_76508	AT	1.19961e-06	2.61504e-05	1.07108	0.0990704
RMDN1	ID_84375	ES	1.21112e-06	2.63451e-05	0.919713	-0.120744
HNRNPLL	ID_53259	AT	1.21715e-06	2.64199e-05	1.82765	0.86999
MTFR1L	ID_1196	AP	1.23488e-06	2.67478e-05	1.72275	0.784711
USHBP1	ID_48248	RI	1.25214e-06	2.70188e-05	1.35561	0.438941
LAMA4	ID_77295	AT	1.25269e-06	2.70188e-05	1.03696	0.0523569
MDK	ID_15566	AP	1.25885e-06	2.70374e-05	1.12822	0.174044
MDK	ID_15567	AP	1.25885e-06	2.70374e-05	0.53601	-0.899668
CROT	ID_80323	AT	1.32726e-06	2.84468e-05	2.23063	1.15745
RPL7	ID_84149	AD	1.33943e-06	2.86476e-05	0.986907	-0.0190141
NELFA	ID_68543	ES	1.35922e-06	2.90099e-05	2.18196	1.12562
SNX5	ID_58744	AT	1.366e-06	2.90332e-05	0.936447	-0.0947313
SNX5	ID_58745	AT	1.366e-06	2.90332e-05	2.1389	1.09687
XPA	ID_87022	ES	1.42608e-06	3.02471e-05	2.1003	1.07059
NPIPA5	ID_34147	AT	1.43994e-06	3.04776e-05	2.13535	1.09447
AFMID	ID_43788	AT	1.44682e-06	3.04968e-05	0.966693	-0.0488705
AFMID	ID_43789	AT	1.44682e-06	3.04968e-05	2.09998	1.07037
ANKMY1	ID_58252	AT	1.45389e-06	3.05826e-05	1.61932	0.695386
CLPP	ID_47023	AP	1.46755e-06	3.07432e-05	0.413519	-1.27397
CLPP	ID_47024	AP	1.46755e-06	3.07432e-05	1.14424	0.194385
SRSF2	ID_43661	RI	1.48199e-06	3.09821e-05	1.39222	0.477389
DNPH1	ID_76257	RI	1.49618e-06	3.10884e-05	1.68625	0.753817
MROH1	ID_85542	AT	1.49622e-06	3.10884e-05	2.2821	1.19036
MROH1	ID_85543	AT	1.49622e-06	3.10884e-05	0.861806	-0.214566
PRMT2	ID_60951	AT	1.56939e-06	3.25426e-05	0.914009	-0.12972
PACRGL	ID_68876	AT	1.58451e-06	3.27894e-05	1.54839	0.630766
VKORC1	ID_36226	AP	1.58971e-06	3.28305e-05	0.991108	-0.0128859
MAPKAP1	ID_87583	ES	1.59966e-06	3.29691e-05	0.891561	-0.165595
UBA1	ID_88909	AP	1.63827e-06	3.36969e-05	0.824	-0.279283
MPPED2	ID_14793	AT	1.7018e-06	3.48631e-05	0.801738	-0.318797
MPPED2	ID_14794	AT	1.7018e-06	3.48631e-05	3.13916	1.65038
RARA	ID_40858	AP	1.71e-06	3.49608e-05	0.678648	-0.559264
ZNF738	ID_48763	AT	1.71812e-06	3.50566e-05	0.680531	-0.555267
SAP30BP	ID_43478	ES	1.72611e-06	3.51493e-05	0.561936	-0.831521
CSNK1E	ID_62232	AT	1.73456e-06	3.51808e-05	0.813918	-0.297044
UXT	ID_88941	RI	1.73448e-06	3.51808e-05	1.78781	0.838191
FAM178A	ID_12839	AT	1.77625e-06	3.53933e-05	1.74991	0.807284
FGFR1OP2	ID_20854	AT	1.76784e-06	3.53933e-05	0.889453	-0.16901
FGFR1OP2	ID_20855	AT	1.76784e-06	3.53933e-05	1.63658	0.710684
NDUFB10	ID_33166	RI	1.76784e-06	3.53933e-05	1.71131	0.775102
MBD1	ID_45518	ES	1.75931e-06	3.53933e-05	1.10676	0.146338
PRDX2	ID_47869	AT	1.76704e-06	3.53933e-05	0.997642	-0.00340558
CSNK1E	ID_62231	AT	1.77626e-06	3.53933e-05	1.55648	0.638286
TMED4	ID_79538	AT	1.77621e-06	3.53933e-05	1.07232	0.100741
TMED4	ID_79539	AT	1.77622e-06	3.53933e-05	0.73498	-0.444223
RBM42	ID_49232	ES	1.79321e-06	3.56615e-05	0.990818	-0.0133078
FIP1L1	ID_69311	AT	1.80097e-06	3.57462e-05	0.379234	-1.39884
ZBTB1	ID_27892	AT	1.81893e-06	3.59626e-05	0.902198	-0.148484
ZBTB1	ID_27893	AT	1.81893e-06	3.59626e-05	1.65237	0.724534
ZCCHC10	ID_73327	AT	1.85378e-06	3.65809e-05	0.785523	-0.348275
UBE2D3	ID_70117	AP	1.86259e-06	3.66131e-05	1.45402	0.540052
ZCCHC10	ID_73326	AT	1.8626e-06	3.66131e-05	1.63204	0.70668
PML	ID_31627	AT	1.88924e-06	3.70654e-05	1.53111	0.614578
SPINT2	ID_49599	ES	1.90646e-06	3.73316e-05	0.990032	-0.0144524
TMEM199	ID_39890	AT	1.92759e-06	3.7673e-05	1.05509	0.0773663
IL18BP	ID_17473	AT	1.94365e-06	3.77707e-05	1.37427	0.458669
STEAP4	ID_80361	AT	1.9437e-06	3.77707e-05	0.814264	-0.296432
STEAP4	ID_80362	AT	1.9437e-06	3.77707e-05	1.9937	0.995448
TGFBR3	ID_3746	ES	1.95253e-06	3.78062e-05	1.40472	0.490281
NT5C	ID_43362	AD	1.95294e-06	3.78062e-05	1.48651	0.571928
ARL17B	ID_42018	AT	2.01866e-06	3.90045e-05	1.41553	0.501339
WDR20	ID_29338	AT	2.04728e-06	3.94826e-05	0.591067	-0.758607
ISCU	ID_24244	ES	2.06683e-06	3.97846e-05	2.17712	1.12242
ING5	ID_58407	AT	2.10632e-06	4.03165e-05	1.54867	0.631033
ING5	ID_58408	AT	2.10632e-06	4.03165e-05	0.845796	-0.241619
USP4	ID_64850	AT	2.10627e-06	4.03165e-05	0.922118	-0.116976
ZNF525	ID_51710	AT	2.12626e-06	4.06219e-05	1.16472	0.219986
SETD3	ID_29214	AT	2.13605e-06	4.06602e-05	1.91226	0.935282
GNAS	ID_60004	AA	2.13623e-06	4.06602e-05	0.942481	-0.0854639
IRF3	ID_51002	AD	2.21519e-06	4.20844e-05	2.67234	1.4181
RPS24	ID_12295	ES	2.32528e-06	4.39306e-05	0.541627	-0.884627
ITPR2	ID_20849	AT	2.31933e-06	4.39306e-05	1.0135	0.0193397
ZNF655	ID_80662	AT	2.32525e-06	4.39306e-05	1.31452	0.394536
HDAC10	ID_62802	ES	2.38953e-06	4.5061e-05	1.0379	0.0536671
DHDDS	ID_1274	AT	2.42557e-06	4.52865e-05	1.60865	0.685849
LHPP	ID_13400	AT	2.42551e-06	4.52865e-05	0.930469	-0.10397
LHPP	ID_13401	AT	2.42551e-06	4.52865e-05	2.88705	1.52959
MOGS	ID_54072	ES	2.43236e-06	4.52865e-05	1.05738	0.0804919
FIP1L1	ID_69310	AT	2.41391e-06	4.52865e-05	1.27632	0.351996
SGK1	ID_77775	AT	2.4069e-06	4.52865e-05	0.995802	-0.00606848
ABCD1	ID_90467	AT	2.437e-06	4.52865e-05	0.927148	-0.109129
ABCD1	ID_90468	AT	2.437e-06	4.52865e-05	2.16359	1.11342
PFDN5	ID_22010	ES	2.44769e-06	4.54024e-05	1.01124	0.0161191
GTF3A	ID_25533	ES	2.50426e-06	4.63674e-05	1.04112	0.0581404
MTERF4	ID_58312	AT	2.55592e-06	4.72382e-05	1.70985	0.773871
ANKRD13D	ID_17155	AP	2.56569e-06	4.72477e-05	0.572066	-0.805747
ANKRD13D	ID_17156	AP	2.5657e-06	4.72477e-05	1.48007	0.565667
SETD3	ID_29213	AT	2.58985e-06	4.75258e-05	0.971899	-0.0411215
PPP2R5C	ID_29320	AT	2.59012e-06	4.75258e-05	0.662549	-0.5939
MLLT10	ID_10970	AT	2.6267e-06	4.80243e-05	0.799383	-0.323042
MLLT10	ID_10971	AT	2.62669e-06	4.80243e-05	1.84991	0.887454
PPRC1	ID_12938	ES	2.68919e-06	4.90789e-05	1.07242	0.100864
EIF4A1	ID_38991	ES	2.71341e-06	4.94325e-05	1.00021	0.000298023
DRG2	ID_39548	RI	2.75236e-06	5.00527e-05	2.4059	1.26658
PEX13	ID_53681	AT	2.76524e-06	5.01084e-05	0.890455	-0.167385
PEX13	ID_53682	AT	2.76524e-06	5.01084e-05	1.75726	0.813324
SDCCAG8	ID_10458	ES	2.77598e-06	5.01737e-05	0.913515	-0.1305
B9D1	ID_39711	AT	2.77868e-06	5.01737e-05	0.350096	-1.51418
C10orf76	ID_12932	AT	2.80409e-06	5.02765e-05	2.0839	1.05929
C10orf76	ID_12933	AT	2.80409e-06	5.02765e-05	0.94994	-0.0740918
TPM1	ID_30981	AP	2.79109e-06	5.02765e-05	2.73468	1.45137
POLR2E	ID_46383	AT	2.80378e-06	5.02765e-05	1.02203	0.0314343
VAMP2	ID_39105	RI	2.84365e-06	5.08963e-05	2.19066	1.13137
TPM1	ID_30980	AP	2.85701e-06	5.10459e-05	3.14631	1.65366
ATP8B2	ID_7832	AT	2.8703e-06	5.11937e-05	0.889994	-0.168132
ATP8B2	ID_7833	AT	2.88374e-06	5.13436e-05	2.79042	1.48048
TMA16	ID_71020	ES	2.89689e-06	5.1488e-05	0.949451	-0.074834
UBA52	ID_48466	AP	2.9791e-06	5.27686e-05	2.99236	1.58129
ATP6V0E1	ID_74572	AT	2.97929e-06	5.27686e-05	0.998037	-0.00283498
EXD3	ID_88298	AT	3.04942e-06	5.39171e-05	0.553067	-0.854474
GALNT11	ID_82404	AT	3.17848e-06	5.61019e-05	0.986896	-0.0190302
ATRAID	ID_52953	AD	3.19426e-06	5.62436e-05	0.79668	-0.327928
RPS3A	ID_70825	ES	3.19754e-06	5.62436e-05	1.00239	0.00344611
CDKN2AIPNL	ID_73398	AT	3.2089e-06	5.63463e-05	0.975962	-0.0351037
KTN1	ID_27634	ES	3.23914e-06	5.66824e-05	1.27247	0.347634
IP6K2	ID_64753	RI	3.23915e-06	5.66824e-05	2.25561	1.17352
BTF3L4	ID_2994	ES	3.29951e-06	5.75456e-05	0.967619	-0.0474885
CELF1	ID_15763	AA	3.29976e-06	5.75456e-05	0.769894	-0.377268
PRMT2	ID_60952	AT	3.31506e-06	5.77138e-05	1.84123	0.880669
TCEAL4	ID_89756	AD	3.42393e-06	5.95076e-05	0.638359	-0.647561
SIM2	ID_60534	AT	3.446e-06	5.97892e-05	0.958518	-0.0611231
HNRNPA1	ID_22146	ES	3.45586e-06	5.98585e-05	0.700688	-0.513155
TRABD	ID_62792	RI	3.49524e-06	6.04381e-05	1.04822	0.067937
ASCC3	ID_77091	AT	3.636e-06	6.2559e-05	0.626021	-0.675718
TMEM8B	ID_86320	AT	3.6363e-06	6.2559e-05	1.36365	0.447479
TMEM8B	ID_86321	AT	3.6363e-06	6.2559e-05	0.777427	-0.36322
DPM3	ID_7946	AP	3.66949e-06	6.28215e-05	0.970936	-0.0425512
PPP1R7	ID_58332	AT	3.67003e-06	6.28215e-05	0.832493	-0.26449
PPP1R7	ID_58333	AT	3.67003e-06	6.28215e-05	1.38898	0.474025
SCRN2	ID_42120	RI	3.70404e-06	6.32975e-05	1.42346	0.509403
FBLN1	ID_62665	AT	3.73835e-06	6.3777e-05	1.28999	0.367355
LRP1	ID_22533	AT	3.76424e-06	6.41114e-05	0.995966	-0.00583105
CPNE1	ID_59183	AD	3.7891e-06	6.42343e-05	1.01772	0.0253439
FNBP1	ID_87876	AT	3.79034e-06	6.42343e-05	0.884168	-0.177608
FNBP1	ID_87877	AT	3.79034e-06	6.42343e-05	1.97453	0.98151
GPR107	ID_87892	AT	3.93185e-06	6.6522e-05	0.982866	-0.0249333
LPCAT3	ID_20055	AT	4.00326e-06	6.74273e-05	1.00032	0.000463255
CSAD	ID_21947	AT	4.00326e-06	6.74273e-05	1.02135	0.0304796
HMGB1	ID_25568	AP	4.00519e-06	6.74273e-05	1.03935	0.0556863
ZNF846	ID_47402	ES	4.08939e-06	6.87315e-05	1.22286	0.290255
MIPOL1	ID_27300	AT	4.09872e-06	6.87748e-05	0.662786	-0.593384
GPNMB	ID_78964	AT	4.1174e-06	6.88618e-05	0.942745	-0.0850608
GPNMB	ID_78965	AT	4.1174e-06	6.88618e-05	1.98926	0.992229
ARL2	ID_16726	RI	4.15498e-06	6.93765e-05	0.981856	-0.0264171
PTP4A2	ID_1537	ES	4.19316e-06	6.96819e-05	0.982296	-0.0257704
CC2D1B	ID_3001	AT	4.19376e-06	6.96819e-05	1.79491	0.843913
CC2D1B	ID_3002	AT	4.19376e-06	6.96819e-05	0.929362	-0.105687
CLSPN	ID_1730	AT	4.23245e-06	7.00965e-05	2.07097	1.0503
CLSPN	ID_1731	AT	4.23245e-06	7.00965e-05	0.701076	-0.512358
MRPL43	ID_12854	RI	4.35008e-06	7.18134e-05	0.966095	-0.049763
DOCK9	ID_26173	AT	4.35019e-06	7.18134e-05	2.04219	1.03011
ZFYVE28	ID_68559	AT	4.39057e-06	7.23629e-05	0.812981	-0.298706
CRYZL1	ID_60450	AT	4.41067e-06	7.25769e-05	1.2522	0.324468
RAP1B	ID_22958	ES	4.43065e-06	7.27882e-05	1.78971	0.839723
DIDO1	ID_60093	AT	4.4921e-06	7.36124e-05	1.90863	0.932535
PCDH11X	ID_89581	AT	4.49525e-06	7.36124e-05	1.11327	0.154802
TUBB6	ID_44667	AT	4.57518e-06	7.44433e-05	0.756936	-0.401758
RBP1	ID_67033	AT	4.55414e-06	7.44433e-05	0.935623	-0.096
MRPS18C	ID_69795	ES	4.5751e-06	7.44433e-05	0.913337	-0.130781
ASCC3	ID_77092	AT	4.57472e-06	7.44433e-05	1.0514	0.0723059
TINF2	ID_26931	RI	4.61696e-06	7.50035e-05	0.957022	-0.0633765
PDE2A	ID_17616	ES	4.64415e-06	7.52057e-05	1.00118	0.00169537
ZNF814	ID_52355	AT	4.63825e-06	7.52057e-05	1.66182	0.732765
MTFR1L	ID_1198	AP	4.70232e-06	7.6027e-05	0.719238	-0.475459
HNMT	ID_55470	AT	4.74546e-06	7.64822e-05	0.781231	-0.35618
CTNNB1	ID_64250	RI	4.74542e-06	7.64822e-05	0.88614	-0.174393
ITGB1BP1	ID_52618	ES	4.76656e-06	7.6701e-05	0.972419	-0.0403505
UBAP2	ID_86127	AP	4.83072e-06	7.7611e-05	2.25445	1.17278
TUBB6	ID_44669	AT	4.85498e-06	7.78781e-05	1.4957	0.580819
EIF5A	ID_38908	AP	4.89931e-06	7.83448e-05	1.58001	0.659935
RALGPS1	ID_87608	AT	4.89943e-06	7.83448e-05	0.745421	-0.423872
PTMS	ID_19966	AA	4.94373e-06	7.89295e-05	1.78054	0.832313
SLC7A7	ID_26619	AP	5.01774e-06	7.99859e-05	1.13823	0.186798
ZNF655	ID_80663	AT	5.12763e-06	8.16101e-05	0.670243	-0.577243
C1RL	ID_20073	AT	5.15074e-06	8.18503e-05	2.04457	1.0318
METTL17	ID_26477	RI	5.17451e-06	8.21e-05	1.86181	0.896707
ZFP41	ID_85399	AT	5.24551e-06	8.30974e-05	0.80066	-0.320738
PSMF1	ID_58475	AA	5.26929e-06	8.33446e-05	1.0613	0.0858381
EIF3G	ID_47465	ES	5.29308e-06	8.35913e-05	1.70818	0.772457
DCTN6	ID_83284	ES	5.41491e-06	8.53832e-05	1.41878	0.504649
DIP2C	ID_10597	AT	5.46383e-06	8.56353e-05	0.973332	-0.0389961
MARK3	ID_29450	ES	5.46436e-06	8.56353e-05	0.365994	-1.45011
PACRGL	ID_68877	AT	5.46448e-06	8.56353e-05	0.793454	-0.333781
VPS28	ID_85604	RI	5.43949e-06	8.56353e-05	2.27039	1.18294
PSMG3	ID_78589	AP	5.51406e-06	8.62798e-05	0.706676	-0.500879
RPS9	ID_51812	AP	5.53353e-06	8.63962e-05	0.994224	-0.00835758
RBM39	ID_59235	AT	5.53843e-06	8.63962e-05	0.976849	-0.0337918
PARD3	ID_11208	AT	5.58971e-06	8.69283e-05	0.69469	-0.525558
SUOX	ID_22340	ES	5.58483e-06	8.69283e-05	1.19233	0.25379
FLT1	ID_25556	AT	5.61515e-06	8.69283e-05	1.53006	0.61359
SRPK2	ID_81281	AT	5.61473e-06	8.69283e-05	0.66111	-0.597038
SRPK2	ID_81282	AT	5.61473e-06	8.69283e-05	1.03709	0.0525406
PCYT2	ID_44230	ES	5.69183e-06	8.77161e-05	1.33903	0.421193
IL11RA	ID_86210	AT	5.69182e-06	8.77161e-05	0.893762	-0.162038
IL11RA	ID_86211	AT	5.69182e-06	8.77161e-05	1.63949	0.713245
TAX1BP1	ID_79060	AD	5.7436e-06	8.83805e-05	0.799818	-0.322257
PCMT1	ID_78104	AT	5.76975e-06	8.85158e-05	0.885144	-0.176016
PCMT1	ID_78107	AT	5.76974e-06	8.85158e-05	1.63636	0.710486
GSKIP	ID_29199	AD	5.79536e-06	8.87751e-05	2.06291	1.04468
FLT1	ID_25558	AT	5.84867e-06	8.94575e-05	0.849677	-0.235014
CMC2	ID_37702	AP	5.90174e-06	8.98661e-05	0.892691	-0.163768
ZNF431	ID_48754	AT	5.90181e-06	8.98661e-05	1.21984	0.286694
ZNF431	ID_48755	AT	5.90181e-06	8.98661e-05	0.785738	-0.347879
APOO	ID_88702	AA	5.95516e-06	9.05432e-05	1.28029	0.356471
CXorf40A	ID_90300	AT	6.03649e-06	9.15071e-05	1.10121	0.139093
CXorf40A	ID_90301	AT	6.03649e-06	9.15071e-05	0.626305	-0.675062
PQBP1	ID_89023	AP	6.06337e-06	9.17783e-05	0.975116	-0.0363543
KLC1	ID_29467	AT	6.14678e-06	9.29029e-05	0.834244	-0.261459
KPNA5	ID_77335	AT	6.25872e-06	9.43153e-05	0.822349	-0.282177
KPNA5	ID_77336	AT	6.25872e-06	9.43153e-05	1.72079	0.783075
NDUFA12	ID_23739	ES	6.29781e-06	9.47644e-05	0.996784	-0.00464774
CARF	ID_56967	AT	6.37224e-06	9.57432e-05	1.08391	0.116244
AP1B1	ID_61603	ES	6.57667e-06	9.86694e-05	0.364409	-1.45637
C1RL	ID_20072	AT	6.75629e-06	0.000101073	0.956633	-0.0639623
ATXN2L	ID_35854	RI	6.75668e-06	0.000101073	1.21178	0.277129
METTL21A	ID_57189	AT	6.91007e-06	0.000103216	0.540847	-0.886709
IPO13	ID_2491	AP	6.9725e-06	0.000103542	2.6471	1.40441
IPO13	ID_2492	AP	6.9725e-06	0.000103542	0.85422	-0.227321
PTGER3	ID_3415	AT	6.94267e-06	0.000103542	0.509052	-0.974116
SLC3A2	ID_16462	AP	6.97247e-06	0.000103542	2.12634	1.08837
GNB2L1	ID_75052	AP	7.00304e-06	0.000103845	0.977353	-0.0330485
TINF2	ID_26933	RI	7.03522e-06	0.00010417	0.935648	-0.0959623
HNRNPA1	ID_22145	AA	7.22692e-06	0.000106854	0.965237	-0.0510442
CMC2	ID_37703	AP	7.32513e-06	0.000108149	1.77899	0.831056
COX17	ID_66349	AT	7.39071e-06	0.00010896	1.25408	0.326625
ATP2A2	ID_24417	RI	7.40502e-06	0.000109013	0.999824	-0.000254536
METTL21A	ID_57191	AT	7.45757e-06	0.000109628	1.15041	0.202148
HSPA14	ID_10830	AT	7.55841e-06	0.000110316	1.3014	0.380068
HSPA14	ID_10831	AT	7.55842e-06	0.000110316	0.695286	-0.524321
ACAT1	ID_18600	AT	7.55691e-06	0.000110316	0.982184	-0.0259349
RPL24	ID_65970	ES	7.54478e-06	0.000110316	0.996868	-0.00452601
RPL9	ID_69058	AP	7.52315e-06	0.000110316	0.986409	-0.0197415
INVS	ID_87074	AT	7.58839e-06	0.000110595	3.73918	1.90272
SERF1B	ID_72405	AT	7.66041e-06	0.000111486	0.75271	-0.409835
GINS4	ID_83515	AT	7.72927e-06	0.000112168	1.33424	0.416014
GINS4	ID_83516	AT	7.72927e-06	0.000112168	0.588244	-0.765513
HNRNPA2B1	ID_79038	AA	7.76327e-06	0.000112501	1.05478	0.0769455
INO80B	ID_54060	AT	7.83347e-06	0.000113197	0.934966	-0.0970134
INO80B	ID_54061	AT	7.83347e-06	0.000113197	1.28679	0.363774
ATPAF2	ID_39532	AT	7.90363e-06	0.000114049	1.08909	0.123126
SYNGR1	ID_62298	AT	7.93927e-06	0.000114402	1.2283	0.296667
CC2D2A	ID_68806	AT	8.04623e-06	0.000115616	1.31585	0.395999
CC2D2A	ID_68807	AT	8.04623e-06	0.000115616	0.77382	-0.369931
FLAD1	ID_7864	AT	8.11786e-06	0.000116482	0.678829	-0.558881
N4BP2L2	ID_25597	AD	8.22651e-06	0.000117561	0.961662	-0.0563986
ESCO2	ID_83184	AT	8.22765e-06	0.000117561	0.725655	-0.462644
ESCO2	ID_83185	AT	8.22765e-06	0.000117561	1.42925	0.515256
ZMYM6	ID_1711	AT	8.30104e-06	0.000118444	0.632642	-0.660539
ILK	ID_14167	ES	8.43057e-06	0.000120124	1.00548	0.00788495
KLC1	ID_29491	AA	8.52546e-06	0.000121306	1.84133	0.88075
RPTOR	ID_44082	AT	8.55208e-06	0.000121516	0.979011	-0.0306036
TMEM126B	ID_18113	AT	8.67778e-06	0.00012313	0.985153	-0.0215806
FAM219B	ID_31792	RI	8.71785e-06	0.000123527	0.881549	-0.181887
GLG1	ID_37565	RI	8.75656e-06	0.000123903	0.925148	-0.112244
ZNF264	ID_52207	AT	8.79584e-06	0.000124115	0.588529	-0.764815
TCEA2	ID_60189	RI	8.79517e-06	0.000124115	2.43606	1.28455
DOCK9	ID_26175	AT	8.87348e-06	0.000124874	0.970945	-0.0425386
SERF1A	ID_72416	AT	8.87412e-06	0.000124874	0.785533	-0.348256
RPL23A	ID_39967	AP	8.95054e-06	0.000125776	0.989162	-0.0157217
TCF7L2	ID_13122	AT	9.03698e-06	0.000126468	1.00524	0.00754439
SMIM7	ID_48183	AT	9.03321e-06	0.000126468	1.53582	0.619006
PCNP	ID_65962	AA	9.03336e-06	0.000126468	1.52137	0.605371
ARL16	ID_44150	ES	9.11031e-06	0.000127194	1.35108	0.434114
TGIF1	ID_44497	AP	9.11377e-06	0.000127194	1.6379	0.711848
EXD3	ID_88296	AT	9.23595e-06	0.000128723	1.56335	0.64464
RBP1	ID_67032	AT	9.31793e-06	0.000129688	2.24859	1.16902
TMEM134	ID_17231	ES	9.34653e-06	0.000129847	1.13649	0.184586
DHRS1	ID_26954	RI	9.3595e-06	0.000129847	1.75802	0.813954
EPHA3	ID_65671	AT	9.38028e-06	0.000129847	4.32243	2.11184
EPHA3	ID_65672	AT	9.38028e-06	0.000129847	0.886768	-0.173372
ZFAND4	ID_11368	AT	9.40103e-06	0.000129958	1.76811	0.822207
UROS	ID_13429	AT	9.56772e-06	0.000131568	0.978581	-0.0312364
SIMC1	ID_74635	AT	9.56905e-06	0.000131568	1.33525	0.417107
SIMC1	ID_74636	AT	9.56905e-06	0.000131568	0.524368	-0.931348
VPS28	ID_85602	RI	9.56875e-06	0.000131568	2.11105	1.07796
RFX7	ID_30752	AT	9.61161e-06	0.000131975	1.93321	0.950998
TPI1	ID_19990	AP	9.65103e-06	0.000132338	0.985567	-0.020974
DDT	ID_61358	AT	9.73799e-06	0.000133202	0.983102	-0.0245869
IP6K2	ID_64743	AT	9.74011e-06	0.000133202	1.43924	0.525309
FAM175A	ID_69798	AT	9.87011e-06	0.000134799	1.46977	0.555592
KIAA0513	ID_37876	AP	9.94845e-06	0.000135687	1.38886	0.473902
RPL37A	ID_57414	AT	1.00885e-05	0.000137257	0.984664	-0.0222969
C8orf59	ID_84333	ES	1.00904e-05	0.000137257	0.94961	-0.0745925
SLMAP	ID_65391	AT	1.0179e-05	0.000138277	0.972757	-0.0398492
C16orf52	ID_35532	AT	1.02705e-05	0.000139335	0.857294	-0.222138
NDUFB10	ID_33167	AD	1.03089e-05	0.000139669	0.994273	-0.00828598
VASH1	ID_28555	AT	1.04068e-05	0.00014044	1.82111	0.864815
VASH1	ID_28556	AT	1.04068e-05	0.00014044	0.957866	-0.0621046
AGAP3	ID_82353	ES	1.0407e-05	0.00014044	1.07273	0.101287
CHMP3	ID_54438	AP	1.07534e-05	0.000144923	0.991556	-0.0122336
KIAA0513	ID_37875	AP	1.0771e-05	0.000144968	0.5724	-0.804905
PMP22	ID_39343	AT	1.12607e-05	0.000151026	1.00013	0.000190031
SERF1B	ID_72403	AT	1.12655e-05	0.000151026	1.12017	0.163716
NDUFA2	ID_73706	AA	1.12643e-05	0.000151026	1.58441	0.663946
TMC6	ID_43757	AT	1.15665e-05	0.00015385	0.704633	-0.505055
TMC6	ID_43758	AT	1.15665e-05	0.00015385	1.18263	0.242004
BCAM	ID_50346	AT	1.15666e-05	0.00015385	0.888534	-0.170501
BCAM	ID_50347	AT	1.15666e-05	0.00015385	1.9435	0.95866
MAPKAP1	ID_87578	AT	1.15663e-05	0.00015385	2.08139	1.05755
MAPKAP1	ID_87579	AT	1.15663e-05	0.00015385	0.931883	-0.10178
S100A4	ID_7713	AP	1.17711e-05	0.000156365	3.56193	1.83266
PDCD6	ID_71426	AD	1.18226e-05	0.000156845	1.06517	0.0910855
ISOC2	ID_52104	AA	1.19789e-05	0.000158712	1.47869	0.564317
GRAMD1A	ID_49010	AT	1.21382e-05	0.000159579	1.66977	0.739649
GRAMD1A	ID_49011	AT	1.21382e-05	0.000159579	0.879068	-0.185953
FCGRT	ID_50957	AP	1.21381e-05	0.000159579	0.726361	-0.461242
FCGRT	ID_50958	AP	1.21381e-05	0.000159579	1.28177	0.358134
ARHGEF39	ID_86268	AP	1.21379e-05	0.000159579	0.661247	-0.59674
ARHGEF39	ID_86269	AP	1.21379e-05	0.000159579	1.80591	0.852723
CFLAR	ID_56799	ES	1.2191e-05	0.000160068	1.37876	0.463369
LAMC2	ID_9169	AT	1.22446e-05	0.000160358	0.64045	-0.642842
LAMC2	ID_9170	AT	1.22446e-05	0.000160358	1.04822	0.067938
CCNDBP1	ID_30219	AA	1.25155e-05	0.000163491	2.68759	1.42631
SRSF2	ID_43663	RI	1.25158e-05	0.000163491	2.59357	1.37494
YME1L1	ID_11061	AA	1.27917e-05	0.00016667	1.24148	0.312064
NARF	ID_44398	ES	1.27918e-05	0.00016667	2.71376	1.44029
HMGN3	ID_76814	AD	1.28482e-05	0.00016719	1.14826	0.199444
NIN	ID_27491	AT	1.30179e-05	0.000168967	1.61284	0.689601
RPS9	ID_51826	ES	1.30096e-05	0.000168967	0.994541	-0.00789793
NFYC	ID_2020	ES	1.31885e-05	0.000170964	1.55131	0.633486
RPP25L	ID_86179	AD	1.33628e-05	0.000173005	1.43356	0.519602
MTMR10	ID_29789	RI	1.34531e-05	0.000173953	1.25006	0.322002
ZNF559	ID_47273	AT	1.3539e-05	0.00017462	1.44207	0.528143
ZNF559	ID_47274	AT	1.3539e-05	0.00017462	0.925083	-0.112345
ICAM3	ID_47503	RI	1.35788e-05	0.000174912	1.91563	0.937818
IFI27	ID_29088	AA	1.35979e-05	0.000174938	0.859523	-0.218392
ZBTB25	ID_27882	AT	1.36578e-05	0.000175267	1.29004	0.367411
ZBTB25	ID_27883	AT	1.36578e-05	0.000175267	0.776508	-0.364928
SERF1A	ID_72415	AT	1.37174e-05	0.00017581	1.15603	0.209177
CHEK1	ID_19307	AP	1.39228e-05	0.000178219	0.815617	-0.294036
SYT15	ID_11437	AA	1.4045e-05	0.000179558	1.12508	0.170023
TM4SF19	ID_68240	AT	1.43056e-05	0.00018266	3.59483	1.84593
DHDDS	ID_1273	AT	1.43272e-05	0.000182707	0.904205	-0.145277
ISCU	ID_24221	AT	1.45093e-05	0.000184643	0.992038	-0.0115327
DTX2	ID_80174	ES	1.45152e-05	0.000184643	1.20757	0.272103
EHBP1L1	ID_16875	AP	1.48341e-05	0.000187299	0.585109	-0.773222
EHBP1L1	ID_16876	AP	1.48341e-05	0.000187299	1.54395	0.626627
URGCP	ID_79354	AP	1.4834e-05	0.000187299	0.595662	-0.747434
PMPCB	ID_81177	RI	1.48333e-05	0.000187299	1.79251	0.841981
CHM	ID_89563	AT	1.47697e-05	0.000187299	0.865964	-0.207621
CHM	ID_89564	AT	1.47697e-05	0.000187299	1.9725	0.980022
ZDHHC24	ID_17064	AT	1.48985e-05	0.000187647	1.13989	0.188897
ZDHHC24	ID_17065	AT	1.48985e-05	0.000187647	0.71299	-0.488047
AIG1	ID_77970	AT	1.49633e-05	0.000188231	1.93443	0.951908
CHEK1	ID_19309	AP	1.5121e-05	0.000189981	3.00056	1.58523
SRI	ID_80356	AT	1.52246e-05	0.000190813	1.90953	0.933215
SRI	ID_80357	AT	1.52246e-05	0.000190813	0.956917	-0.0635343
SPEF2	ID_71767	AT	1.53661e-05	0.00019235	0.584932	-0.77366
HNRNPAB	ID_74844	ES	1.54235e-05	0.000192832	1.049	0.0690136
IP6K2	ID_64742	AT	1.54913e-05	0.000193442	0.797326	-0.326759
PCBP2	ID_22052	ES	1.57618e-05	0.000195861	1.12235	0.166522
PPM1F	ID_61261	AT	1.57618e-05	0.000195861	0.923262	-0.115189
PPM1F	ID_61262	AT	1.57618e-05	0.000195861	1.43469	0.520739
NGLY1	ID_63754	ES	1.57613e-05	0.000195861	0.928939	-0.106344
NDUFA3	ID_51776	AT	1.58302e-05	0.000196279	2.03466	1.02479
ECE2	ID_67860	AT	1.58339e-05	0.000196279	1.03209	0.0455757
NIPAL3	ID_1111	AT	1.60371e-05	0.000198557	0.696734	-0.521321
CHCHD3	ID_81834	AT	1.63166e-05	0.000201284	0.91509	-0.128014
OSGIN2	ID_84389	AT	1.63091e-05	0.000201284	0.953308	-0.0689862
OSGIN2	ID_84390	AT	1.63091e-05	0.000201284	2.66497	1.41412
NCOR2	ID_25143	AD	1.63872e-05	0.000201911	1.30218	0.380929
RPS27A	ID_53605	AP	1.65809e-05	0.000204051	0.995344	-0.00673287
EEF1B2	ID_57143	RI	1.66726e-05	0.000204442	0.933348	-0.0995125
MCM9	ID_77354	AT	1.66728e-05	0.000204442	1.80747	0.85397
MCM9	ID_77355	AT	1.66728e-05	0.000204442	0.901331	-0.149871
RBCK1	ID_58453	ES	1.69243e-05	0.000207277	0.968374	-0.0463638
FN1	ID_57392	AA	1.70352e-05	0.000208384	0.967683	-0.0473938
EIF3G	ID_47470	AD	1.71082e-05	0.000209028	1.23417	0.303545
IFNAR1	ID_60398	AP	1.73326e-05	0.000211263	2.02309	1.01656
IFNAR1	ID_60399	AP	1.73326e-05	0.000211263	0.807456	-0.308545
MED11	ID_38579	AA	1.75563e-05	0.000213734	1.63179	0.706458
RPL27A	ID_14253	AT	1.78572e-05	0.000216949	0.99203	-0.0115446
CHCHD3	ID_81833	AT	1.78628e-05	0.000216949	1.78046	0.832249
MLLT6	ID_40580	AT	1.79324e-05	0.000217535	0.989722	-0.0149048
TMTC2	ID_23563	AT	1.80172e-05	0.000217786	0.870385	-0.200274
TMTC2	ID_23564	AT	1.80172e-05	0.000217786	2.23733	1.16178
BRE	ID_53054	ES	1.80167e-05	0.000217786	0.737165	-0.43994
DNAJC5	ID_60176	ES	1.81713e-05	0.000219389	1.36684	0.45085
RBCK1	ID_58450	AT	1.82513e-05	0.000219834	1.25987	0.333276
RBCK1	ID_58451	AT	1.82513e-05	0.000219834	0.839775	-0.251925
NDUFA13	ID_48649	AT	1.8481e-05	0.000222339	0.984066	-0.0231734
ZNF483	ID_87211	AT	1.85672e-05	0.000223113	1.14252	0.192225
AKR1A1	ID_2695	AT	1.88073e-05	0.00022539	1.80903	0.855214
AKR1A1	ID_2696	AT	1.88073e-05	0.00022539	0.968929	-0.0455365
ABCC9	ID_20715	AT	1.8823e-05	0.00022539	1.0314	0.0446094
CMC4	ID_90668	AP	1.9216e-05	0.000229556	1.82864	0.87077
CMC4	ID_90669	AP	1.9216e-05	0.000229556	0.877619	-0.188334
ZFYVE28	ID_68560	AT	1.92902e-05	0.000230174	2.88957	1.53086
SMARCD1	ID_21643	ES	1.94592e-05	0.00023071	0.979366	-0.0300798
YPEL3	ID_36074	AD	1.93801e-05	0.00023071	1.68711	0.754557
USF2	ID_49096	ES	1.94708e-05	0.00023071	0.995017	-0.00720623
TMEM242	ID_78239	AT	1.94641e-05	0.00023071	0.915057	-0.128067
TMEM242	ID_78240	AT	1.94641e-05	0.00023071	2.87872	1.52543
RC3H2	ID_87484	AT	1.93814e-05	0.00023071	0.886014	-0.174598
WDR74	ID_16453	AP	1.95485e-05	0.000231093	0.548923	-0.865324
WDR74	ID_16454	AP	1.95485e-05	0.000231093	1.5911	0.670026
PPHLN1	ID_21214	AT	2.0142e-05	0.000237834	0.464622	-1.10587
PFKM	ID_21429	ES	2.02289e-05	0.000238584	1.43339	0.519432
MIPOL1	ID_27299	AT	2.03158e-05	0.000239333	1.18598	0.246078
SMAD2	ID_45449	AT	2.04024e-05	0.000239523	1.73341	0.793612
SMAD2	ID_45450	AT	2.04024e-05	0.000239523	0.942555	-0.0853511
FASTK	ID_82336	RI	2.04022e-05	0.000239523	1.76432	0.819109
LTBP3	ID_16863	AP	2.05762e-05	0.000241286	2.98652	1.57846
MAP4K3	ID_53324	AT	2.06047e-05	0.000241343	0.98621	-0.0200326
ECHDC1	ID_77467	ES	2.06659e-05	0.000241782	0.896216	-0.158081
DYNC1I2	ID_55938	AP	2.07546e-05	0.000242264	1.32407	0.404981
DYNC1I2	ID_55939	AP	2.07546e-05	0.000242264	0.821927	-0.282917
SRSF5	ID_28158	AA	2.08437e-05	0.000243026	1.71663	0.779582
KLC1	ID_29468	AT	2.09328e-05	0.000243785	1.54024	0.623151
DHRS4L2	ID_26799	AT	2.1002e-05	0.000244313	0.993871	-0.00886911
NFATC4	ID_26991	RI	2.12024e-05	0.000246087	1.37821	0.462795
TOP3B	ID_61266	RI	2.12027e-05	0.000246087	1.62122	0.697076
TINF2	ID_26932	RI	2.14754e-05	0.000248686	0.922579	-0.116255
DHX30	ID_64544	ES	2.14741e-05	0.000248686	1.4764	0.562082
RNASEH2B	ID_25926	AT	2.15675e-05	0.000249186	1.27558	0.351149
RNASEH2B	ID_25927	AT	2.15675e-05	0.000249186	0.754066	-0.407238
DYX1C1	ID_30732	AT	2.17518e-05	0.000251031	0.596824	-0.744623
KTN1	ID_27637	ES	2.2032e-05	0.000253978	1.21359	0.279284
UCHL5	ID_9240	AT	2.26018e-05	0.000260253	0.879934	-0.184533
CLCN6	ID_686	AT	2.27947e-05	0.000261764	0.892357	-0.164307
CYB5RL	ID_3128	AT	2.28357e-05	0.000261764	2.30022	1.20177
CYB5RL	ID_3129	AT	2.28357e-05	0.000261764	0.736663	-0.440924
DHRS4	ID_26778	AT	2.27887e-05	0.000261764	0.989652	-0.0150067
EFCAB11	ID_28799	AT	2.29899e-05	0.000262797	0.828823	-0.270864
PPM1B	ID_53413	AT	2.29897e-05	0.000262797	0.862082	-0.214104
PFN2	ID_67255	RI	2.30031e-05	0.000262797	1.00021	0.000304685
PNRC1	ID_76987	AD	2.30785e-05	0.000263363	1.01199	0.0171899
UGGT2	ID_26130	AT	2.31856e-05	0.00026429	0.636189	-0.652472
UVRAG	ID_17878	AP	2.32707e-05	0.000264964	1.46452	0.550429
NPIPB3	ID_34463	ES	2.33838e-05	0.000265955	0.73872	-0.436901
RASSF8	ID_20838	AT	2.36834e-05	0.000268763	2.5613	1.35687
RASSF8	ID_20839	AT	2.36834e-05	0.000268763	0.874243	-0.193893
HNMT	ID_55469	AT	2.37842e-05	0.000269009	1.81366	0.858905
NCBP2	ID_68266	ES	2.37775e-05	0.000269009	0.97804	-0.0320349
SLC35A2	ID_89034	AT	2.37838e-05	0.000269009	1.13223	0.179163
TBC1D10A	ID_61719	ES	2.38834e-05	0.000269832	2.0965	1.06798
UCHL5	ID_9239	AT	2.40888e-05	0.000271852	1.52032	0.604379
ZNF91	ID_48815	AT	2.42941e-05	0.000273563	0.72	-0.473932
ZNF91	ID_48816	AT	2.42941e-05	0.000273563	1.25915	0.332449
FAT3	ID_18278	AT	2.4515e-05	0.00027514	0.649915	-0.621676
FAT3	ID_18279	AT	2.4515e-05	0.00027514	2.384	1.25339
CCNC	ID_77077	AT	2.44987e-05	0.00027514	1.63967	0.713402
NME1	ID_42498	AP	2.45888e-05	0.000275214	0.9942	-0.00839172
HNRNPAB	ID_74845	ES	2.45947e-05	0.000275214	1.01009	0.014487
COG5	ID_81337	AT	2.46025e-05	0.000275214	0.978302	-0.0316476
SCAND1	ID_59258	RI	2.48142e-05	0.000277277	0.856251	-0.223894
CRELD1	ID_63291	ES	2.5082e-05	0.000279963	0.980762	-0.0280252
MYL6	ID_22380	ES	2.51668e-05	0.000280321	0.999732	-0.000386446
SH3GL3	ID_32281	ES	2.5169e-05	0.000280321	1.36244	0.44619
SLC39A1	ID_7763	AP	2.52366e-05	0.000280767	2.54838	1.34958
ILF3	ID_47569	AT	2.53448e-05	0.000281358	1.16682	0.222577
ILF3	ID_47570	AT	2.53448e-05	0.000281358	0.843746	-0.245119
RAVER2	ID_3279	AT	2.57352e-05	0.000283077	0.987021	-0.0188469
TAOK2	ID_35998	AT	2.57772e-05	0.000283077	0.854068	-0.227577
TAOK2	ID_35999	AT	2.57772e-05	0.000283077	1.17961	0.238308
HNRNPL	ID_49699	ES	2.55587e-05	0.000283077	0.589067	-0.763497
ZNF83	ID_51475	AP	2.56667e-05	0.000283077	1.65936	0.730624
FASTK	ID_82334	RI	2.56684e-05	0.000283077	1.51933	0.603435
CHMP7	ID_83073	ES	2.56679e-05	0.000283077	1.32505	0.406048
NOL8	ID_86848	AA	2.57761e-05	0.000283077	1.90392	0.928973
CXorf40B	ID_90327	AT	2.56681e-05	0.000283077	0.742409	-0.429713
CXorf40B	ID_90328	AT	2.56681e-05	0.000283077	1.07578	0.105388
NIN	ID_27492	AT	2.58866e-05	0.000283973	0.843218	-0.246022
PNKD	ID_57462	AT	2.61065e-05	0.000285771	0.840348	-0.250941
PNKD	ID_57463	AT	2.61065e-05	0.000285771	2.0201	1.01443
NPIPB3	ID_34443	AP	2.64392e-05	0.000287868	0.792462	-0.335586
MPRIP	ID_39457	ES	2.6439e-05	0.000287868	0.701843	-0.510779
STX7	ID_77641	AT	2.64133e-05	0.000287868	2.26335	1.17846
STX7	ID_77642	AT	2.64133e-05	0.000287868	0.922986	-0.11562
ZNF706	ID_84735	AP	2.64354e-05	0.000287868	1.02785	0.039628
MLEC	ID_24778	ES	2.6572e-05	0.000288698	0.992363	-0.0110602
EDEM2	ID_59064	AP	2.65511e-05	0.000288698	0.67847	-0.559642
CCS	ID_17073	AA	2.66613e-05	0.000289325	1.76235	0.817498
TSR1	ID_38387	AT	2.66864e-05	0.000289325	0.992591	-0.0107287
CIRBP	ID_46426	RI	2.67762e-05	0.000289991	1.82849	0.87065
PPM1B	ID_53414	AT	2.70029e-05	0.000292135	1.25383	0.326345
SQSTM1	ID_74932	AP	2.72312e-05	0.000294294	0.905134	-0.143797
ENSA	ID_7494	AT	2.73464e-05	0.000294914	0.571691	-0.806693
C17orf62	ID_44337	AP	2.73317e-05	0.000294914	2.72817	1.44793
RAN	ID_25206	ES	2.74561e-05	0.000295784	1.02123	0.0303027
LTBP3	ID_16861	AP	2.78109e-05	0.00029929	1.71947	0.781965
FGFR2	ID_13296	AT	2.80465e-05	0.00030119	1.67109	0.740786
THOP1	ID_46623	AP	2.80465e-05	0.00030119	2.06132	1.04357
NIPAL3	ID_1109	AT	2.8165e-05	0.000301629	1.77996	0.831842
ADAMTS4	ID_8590	AT	2.81761e-05	0.000301629	1.03861	0.0546596
TRMT112	ID_16634	AA	2.81382e-05	0.000301629	0.995181	-0.00696955
NME1-NME2	ID_42506	AP	2.85222e-05	0.000305014	1.24436	0.315409
C19orf25	ID_46502	AT	2.86424e-05	0.00030534	0.788194	-0.343378
C19orf25	ID_46503	AT	2.86424e-05	0.00030534	1.11874	0.161873
PAQR3	ID_69651	AT	2.86331e-05	0.00030534	1.88294	0.912991
CD164	ID_77187	ES	2.87615e-05	0.000306289	0.965864	-0.0501075
WWOX	ID_37672	AT	2.88842e-05	0.000307275	0.882791	-0.179856
DNAJC16	ID_765	AT	2.93727e-05	0.000312146	0.961508	-0.0566296
DYNC2LI1	ID_53400	AA	2.97455e-05	0.000315778	1.49617	0.581274
SYP	ID_89105	AT	3.03743e-05	0.00032212	1.89019	0.918532
ANKRD42	ID_18050	AT	3.07617e-05	0.000325888	1.33194	0.413529
ZNF726	ID_48832	AT	3.08906e-05	0.000326915	0.66761	-0.582922
TRPM6	ID_86615	AT	3.11498e-05	0.000329316	0.655679	-0.608938
JTB	ID_7776	RI	3.12803e-05	0.000330353	1.61812	0.694323
KIAA1217	ID_11000	RI	3.16769e-05	0.000334196	1.63186	0.706521
PIGO	ID_86233	RI	3.17991e-05	0.000335139	1.22009	0.286991
ARL17A	ID_42027	AT	3.19426e-05	0.000336304	0.85695	-0.222717
S100A4	ID_7711	AP	3.20762e-05	0.000337017	0.902741	-0.147616
FAM175A	ID_69800	AT	3.20764e-05	0.000337017	0.873139	-0.195716
CLTC	ID_42785	AT	3.21769e-05	0.000337725	0.995913	-0.00590817
NUBP2	ID_33138	ES	3.22102e-05	0.000337727	1.12088	0.164635
AK2	ID_1656	ES	3.23432e-05	0.000338774	0.527615	-0.922444
L3MBTL4	ID_44550	AT	3.24787e-05	0.000339496	2.23395	1.1596
L3MBTL4	ID_44551	AT	3.24787e-05	0.000339496	0.697042	-0.520682
ANXA2	ID_30957	ES	3.26167e-05	0.000340246	1.50261	0.58747
CCDC40	ID_44017	AT	3.26172e-05	0.000340246	0.574028	-0.800807
ENSA	ID_7493	AT	3.28909e-05	0.000342052	1.22437	0.292037
ANKLE2	ID_25297	AT	3.28892e-05	0.000342052	2.23629	1.16111
ANKLE2	ID_25298	AT	3.28893e-05	0.000342052	0.964476	-0.0521823
NIT1	ID_8555	AT	3.31663e-05	0.000344215	0.67941	-0.557646
NIT1	ID_8556	AT	3.31663e-05	0.000344215	1.13181	0.178636
ACSL1	ID_71321	AT	3.33263e-05	0.000345524	0.996635	-0.00486238
PAXBP1	ID_60374	AT	3.34446e-05	0.000346047	0.924107	-0.113868
PAXBP1	ID_60375	AT	3.34446e-05	0.000346047	1.6202	0.696175
QARS	ID_64826	ES	3.35778e-05	0.000347072	0.98558	-0.0209547
C8orf34	ID_84098	AT	3.36259e-05	0.000347218	1.23033	0.299049
RPLP0	ID_24740	AA	3.38648e-05	0.000348978	1.32151	0.402184
BCL7B	ID_79959	ES	3.38648e-05	0.000348978	1.35182	0.434898
RNF14	ID_73849	ES	3.39924e-05	0.00034994	1.02831	0.0402767
CLIP4	ID_53087	AT	3.41482e-05	0.00035119	0.875221	-0.192281
TMEM91	ID_50043	AP	3.42812e-05	0.000352202	0.523398	-0.934019
NQO1	ID_37299	ES	3.44292e-05	0.000353077	0.981749	-0.0265732
NAF1	ID_71008	AT	3.44355e-05	0.000353077	1.16736	0.223249
MPZL2	ID_18983	AT	3.45792e-05	0.000353839	0.901031	-0.150351
MPZL2	ID_18984	AT	3.45792e-05	0.000353839	1.68973	0.756791
PIK3C3	ID_45317	AT	3.48685e-05	0.000356442	0.884503	-0.177061
PAPOLA	ID_29202	AT	3.50132e-05	0.000357562	0.7045	-0.505329
ANKDD1A	ID_31141	ES	3.56061e-05	0.000362528	1.08494	0.11762
NME4	ID_32879	ES	3.56007e-05	0.000362528	0.731964	-0.450155
ZNF169	ID_86926	AT	3.56011e-05	0.000362528	1.18341	0.242955
TFPT	ID_51790	ES	3.57223e-05	0.000363105	0.981271	-0.0272763
PSMG1	ID_60601	ES	3.57339e-05	0.000363105	0.954329	-0.0674417
NEXN	ID_3538	AT	3.62087e-05	0.000367198	0.941363	-0.0871764
TRPM6	ID_86616	AT	3.61981e-05	0.000367198	1.15851	0.212266
BSDC1	ID_1591	RI	3.63495e-05	0.000367998	2.11741	1.0823
NEXN	ID_3537	AT	3.63597e-05	0.000367998	4.9721	2.31386
EDEM2	ID_59063	AP	3.69589e-05	0.000373691	1.33012	0.411553
ATPAF2	ID_39531	AT	3.71109e-05	0.000374857	0.632205	-0.661537
FBXO22	ID_31899	AT	3.72657e-05	0.000375677	1.03773	0.0534323
FBXO22	ID_31900	AT	3.72657e-05	0.000375677	0.72041	-0.473109
CALCOCO2	ID_42231	ES	3.74218e-05	0.000376506	1.42599	0.511961
ARHGDIA	ID_44192	RI	3.74037e-05	0.000376506	1.00681	0.00979577
C20orf96	ID_58437	AT	3.77317e-05	0.000378877	1.80263	0.850106
C20orf96	ID_58438	AT	3.77317e-05	0.000378877	0.872004	-0.197594
DNAJC25	ID_87223	AT	3.8046e-05	0.000381283	0.811395	-0.301524
DNAJC25	ID_87224	AT	3.80461e-05	0.000381283	1.04455	0.0628879
WWOX	ID_37676	AT	3.83565e-05	0.000384016	2.83178	1.50171
PTGR1	ID_87217	AT	3.85358e-05	0.000385434	1.04555	0.0642592
ACADM	ID_3483	AT	3.92865e-05	0.000392557	0.987075	-0.0187683
ATP6V0B	ID_2511	ES	3.94899e-05	0.000393849	1.06292	0.0880264
EFCAB11	ID_28797	AT	3.9493e-05	0.000393849	2.02576	1.01846
MIEF2	ID_39597	AT	4.00416e-05	0.000398541	2.75085	1.45988
MIEF2	ID_39598	AT	4.00416e-05	0.000398541	0.954234	-0.0675847
ZNF677	ID_51701	AT	4.01332e-05	0.000399064	1.2508	0.322853
CLIP4	ID_53088	AT	4.03165e-05	0.000400106	1.823	0.866317
PCBP4	ID_65125	AA	4.03157e-05	0.000400106	1.06625	0.0925428
UBXN1	ID_16396	RI	4.06502e-05	0.000403025	1.78349	0.834701
PDLIM7	ID_74779	ES	4.07965e-05	0.000404084	1.02496	0.0355659
SDHD	ID_18732	AT	4.11434e-05	0.000407124	1.00806	0.0115821
PKMYT1	ID_33330	AA	4.14993e-05	0.000410248	0.721513	-0.470903
ZEB2	ID_55515	AT	4.16723e-05	0.00041037	1.41237	0.498118
ZEB2	ID_55516	AT	4.16723e-05	0.00041037	0.938122	-0.0921518
MRS2	ID_75506	AT	4.16725e-05	0.00041037	0.875075	-0.192522
MRS2	ID_75507	AT	4.16725e-05	0.00041037	1.38672	0.471679
UBALD1	ID_33767	RI	4.20144e-05	0.000413337	2.22681	1.15498
SSH3	ID_17161	AA	4.2365e-05	0.000415984	0.943763	-0.0835031
CYB561	ID_42929	AA	4.23489e-05	0.000415984	0.974233	-0.0376616
MBD1	ID_45501	AT	4.27164e-05	0.000417827	0.924429	-0.113366
MBD1	ID_45503	AT	4.27164e-05	0.000417827	1.72249	0.784492
WDR33	ID_55243	AT	4.27162e-05	0.000417827	0.706511	-0.501215
SIRT5	ID_75393	AT	4.27165e-05	0.000417827	1.38463	0.4695
SIRT5	ID_75391	AT	4.28928e-05	0.00041915	0.896443	-0.157716
SLC2A13	ID_21085	AT	4.30689e-05	0.000420065	0.902363	-0.14822
SLC2A13	ID_21086	AT	4.30689e-05	0.000420065	2.18617	1.12841
ID2	ID_52599	AT	4.31456e-05	0.000420406	0.982813	-0.0250114
RBM39	ID_59248	ME	4.31862e-05	0.000420406	1.06617	0.0924312
EHHADH	ID_67978	AT	4.38949e-05	0.000426898	0.980247	-0.0287834
VWA8	ID_25741	AT	4.41472e-05	0.000428534	1.63686	0.710929
VWA8	ID_25742	AT	4.41472e-05	0.000428534	0.895945	-0.158518
UBL5	ID_47437	AD	4.46931e-05	0.000432616	1.20686	0.27126
AKAP17A	ID_88391	AT	4.46949e-05	0.000432616	1.79313	0.842484
AKAP17A	ID_88392	AT	4.46948e-05	0.000432616	0.942507	-0.0854252
KLC1	ID_29485	ES	4.50648e-05	0.000435783	0.789336	-0.341288
ZNF44	ID_47790	AT	4.52435e-05	0.000437097	0.378283	-1.40246
ATXN2L	ID_35838	RI	4.5998e-05	0.000443965	1.0798	0.11076
TBCK	ID_70263	AP	4.65106e-05	0.000448066	1.10722	0.146944
TBCK	ID_70265	AP	4.65106e-05	0.000448066	0.495721	-1.0124
BLOC1S6	ID_30430	AT	4.67612e-05	0.00044963	0.65542	-0.609508
BLOC1S6	ID_30431	AT	4.67612e-05	0.00044963	1.20394	0.267767
ZNF677	ID_51700	AT	4.73035e-05	0.000454416	0.541463	-0.885066
CREBZF	ID_18136	RI	4.74525e-05	0.000455419	1.02337	0.0333236
PNRC1	ID_76985	AP	4.7529e-05	0.000455725	0.980901	-0.0278212
RPS23	ID_72691	RI	4.82131e-05	0.000461849	1.0029	0.00418295
TECR	ID_47992	AP	4.88263e-05	0.000467285	0.99953	-0.000678576
IRF3	ID_50985	ES	4.9041e-05	0.0004689	0.983117	-0.0245655
MLXIP	ID_24925	AT	4.93174e-05	0.000470661	2.11423	1.08013
MLXIP	ID_24926	AT	4.93174e-05	0.000470661	0.951873	-0.0711586
TMEM134	ID_17232	ES	4.97438e-05	0.000473402	1.02759	0.03927
NAGK	ID_53917	AA	4.97225e-05	0.000473402	2.30375	1.20398
NDUFC1	ID_70619	AT	4.96744e-05	0.000473402	1.02347	0.0334724
PIK3C3	ID_45316	AT	4.99278e-05	0.000474709	1.43736	0.523421
PARD3	ID_11213	AD	5.03351e-05	0.000477709	1.13885	0.187576
VPS28	ID_85600	RI	5.03369e-05	0.000477709	1.52564	0.609414
PCSK5	ID_86632	AT	5.05317e-05	0.000479112	2.31921	1.21363
COMMD4	ID_31852	ES	5.11577e-05	0.000484597	0.983938	-0.0233608
ZNF511	ID_13542	RI	5.20053e-05	0.00049174	1.91299	0.935828
TRNT1	ID_62975	AT	5.20081e-05	0.00049174	0.858127	-0.220737
SLC38A10	ID_44114	AT	5.22209e-05	0.000492838	0.934475	-0.0977719
SLC38A10	ID_44115	AT	5.22209e-05	0.000492838	1.81438	0.859474
POLR3H	ID_62434	ES	5.26424e-05	0.000495945	0.603404	-0.728804
SLC35A2	ID_89035	AT	5.26473e-05	0.000495945	0.497342	-1.00769
PHLPP2	ID_37475	AT	5.35151e-05	0.000503654	1.59754	0.67585
C1orf43	ID_7800	ES	5.39502e-05	0.000507281	0.958577	-0.0610338
ABCB8	ID_82287	AT	5.41724e-05	0.000508433	1.52588	0.609643
ABCB8	ID_82288	AT	5.41724e-05	0.000508433	0.774605	-0.368468
CDKL3	ID_73368	AT	5.46145e-05	0.000512111	0.70548	-0.503324
EPS15L1	ID_48159	ES	5.52837e-05	0.000517911	0.875902	-0.191159
SUOX	ID_22343	ES	5.54902e-05	0.00051812	1.14423	0.194375
TMEM177	ID_55135	AT	5.55092e-05	0.00051812	0.528523	-0.919963
TMEM177	ID_55136	AT	5.55091e-05	0.00051812	1.05455	0.076621
MOBP	ID_64191	AT	5.55067e-05	0.00051812	1.30848	0.387897
DMWD	ID_50528	ES	5.57317e-05	0.000519721	0.854421	-0.22698
GAREML	ID_52882	AP	5.59461e-05	0.000520768	4.1768	2.0624
GAREML	ID_52883	AP	5.59461e-05	0.000520768	0.760173	-0.3956
ROMO1	ID_59223	RI	5.61887e-05	0.000521141	1.58678	0.666105
ARFRP1	ID_60151	AP	5.61894e-05	0.000521141	2.25233	1.17142
C21orf33	ID_60804	AT	5.61905e-05	0.000521141	2.12247	1.08575
C21orf33	ID_60805	AT	5.61904e-05	0.000521141	0.960531	-0.058096
OSCP1	ID_1777	AT	5.64177e-05	0.000522299	1.54395	0.626627
OSCP1	ID_1778	AT	5.64177e-05	0.000522299	0.831502	-0.266209
LPCAT1	ID_71489	AT	5.65582e-05	0.000523125	0.999458	-0.000782323
TIMM10	ID_15855	AA	5.66456e-05	0.000523458	1.60695	0.684324
BANF1	ID_16983	AD	5.68773e-05	0.00052465	0.967665	-0.0474209
AAMDC	ID_17979	ES	5.68439e-05	0.00052465	0.983583	-0.0238814
ZNF771	ID_36105	AT	5.71127e-05	0.00052587	1.43813	0.524194
CRYZL1	ID_60452	AT	5.71123e-05	0.00052587	0.857412	-0.22194
ZNF264	ID_52206	AT	5.78126e-05	0.000530877	1.6447	0.717823
RUVBL1	ID_66639	AT	5.78113e-05	0.000530877	1.07983	0.110799
RUVBL1	ID_66640	AT	5.78113e-05	0.000530877	0.681483	-0.553251
RABGGTB	ID_3514	ES	5.80467e-05	0.000532069	1.37167	0.455936
BSG	ID_46303	AP	5.80185e-05	0.000532069	0.989653	-0.0150049
RNH1	ID_13664	AP	5.82826e-05	0.000533752	0.910756	-0.134863
RHOT2	ID_32942	ES	5.84988e-05	0.000535251	1.05482	0.0770027
PPFIA1	ID_17392	AT	5.87518e-05	0.000537084	1.79069	0.840516
HECTD2	ID_12516	AT	5.92361e-05	0.000540543	0.901237	-0.150021
HECTD2	ID_12517	AT	5.92361e-05	0.000540543	1.65482	0.726672
PPFIA1	ID_17393	AT	5.94707e-05	0.000541234	0.975887	-0.0352133
CAST	ID_72850	AT	5.94278e-05	0.000541234	0.989752	-0.0148611
PSMB7	ID_87532	AT	5.94711e-05	0.000541234	1.07389	0.10285
PNKD	ID_57461	AP	5.99567e-05	0.000545168	2.93252	1.55214
RCOR3	ID_9705	AT	6.04472e-05	0.00054865	1.46032	0.546288
RCOR3	ID_9708	AT	6.04473e-05	0.00054865	0.888306	-0.170871
DYX1C1	ID_30734	AT	6.06927e-05	0.000549899	1.24899	0.320765
WHSC1	ID_68526	AT	6.06874e-05	0.000549899	0.724007	-0.465925
PQLC1	ID_46263	ES	6.16817e-05	0.000558364	0.828528	-0.271378
CAMK1D	ID_10772	AT	6.19323e-05	0.00055964	0.874095	-0.194137
CAMK1D	ID_10773	AT	6.19323e-05	0.00055964	1.32989	0.411306
BBS9	ID_79218	AT	6.22172e-05	0.00056122	4.7824	2.25774
BBS9	ID_79219	AT	6.22172e-05	0.00056122	0.941579	-0.0868459
UVRAG	ID_17880	AP	6.36672e-05	0.000573792	0.541153	-0.885891
TSSC4	ID_13922	RI	6.42151e-05	0.000575262	0.963701	-0.0533424
TCIRG1	ID_17288	RI	6.4225e-05	0.000575262	1.3042	0.383164
THYN1	ID_19549	AD	6.42247e-05	0.000575262	1.22806	0.296384
GHDC	ID_41023	AA	6.39565e-05	0.000575262	1.60919	0.686335
ZNF714	ID_48744	AT	6.42243e-05	0.000575262	1.18491	0.244779
ZNF714	ID_48746	AT	6.42243e-05	0.000575262	0.786028	-0.347347
RABL6	ID_88213	AT	6.39552e-05	0.000575262	0.982848	-0.0249598
DHPS	ID_47835	AD	6.49987e-05	0.000581681	1.5971	0.675454
GMFG	ID_49768	RI	6.52668e-05	0.000583569	1.76513	0.819778
ANAPC11	ID_44201	AP	6.60449e-05	0.000589653	0.9887	-0.0163948
NPHP3	ID_66808	AT	6.60629e-05	0.000589653	0.805105	-0.312752
SERF1A	ID_72413	AP	6.65962e-05	0.000593375	1.08548	0.118332
SERF1A	ID_72414	AP	6.65962e-05	0.000593375	0.643066	-0.636962
ST7L	ID_4205	AT	6.68627e-05	0.000594731	0.884976	-0.176289
SSBP4	ID_48431	ES	6.68649e-05	0.000594731	1.3267	0.407839
IDS	ID_90291	AT	6.7951e-05	0.000603864	0.874315	-0.193775
THOP1	ID_46624	AP	6.82249e-05	0.000605771	0.856032	-0.224264
NDUFAF6	ID_84593	AT	6.84499e-05	0.000607154	0.975343	-0.0360178
IDS	ID_90292	AT	6.84997e-05	0.000607154	1.55002	0.632282
C17orf62	ID_44335	AP	6.93302e-05	0.000613982	0.83759	-0.255685
ZNF141	ID_68344	AT	6.98899e-05	0.000617866	1.52519	0.608988
ZNF141	ID_68345	AT	6.98899e-05	0.000617866	0.738011	-0.438286
TANK	ID_55733	AT	7.01705e-05	0.000618738	0.93684	-0.0941256
TANK	ID_55736	AT	7.01706e-05	0.000618738	1.94351	0.958667
PNKD	ID_57460	AP	7.01673e-05	0.000618738	0.926943	-0.109448
SIRT2	ID_49711	ES	7.04534e-05	0.00062016	1.30771	0.387041
THAP6	ID_69528	AT	7.0453e-05	0.00062016	1.26009	0.333527
ELP6	ID_64531	ES	7.06936e-05	0.000621738	0.976245	-0.0346854
DPY30	ID_53146	AD	7.13027e-05	0.000626555	1.4213	0.507209
BRF1	ID_29625	AD	7.1614e-05	0.00062838	0.886566	-0.1737
DAZAP1	ID_46476	ES	7.18765e-05	0.00062838	0.688534	-0.538401
PRR19	ID_50148	AP	7.18796e-05	0.00062838	1.52132	0.605321
PRR19	ID_50149	AP	7.18796e-05	0.00062838	0.877398	-0.188697
DCBLD1	ID_77342	AT	7.18799e-05	0.00062838	1.07602	0.10571
DCBLD1	ID_77343	AT	7.188e-05	0.00062838	0.73226	-0.449573
COTL1	ID_37853	ES	7.29865e-05	0.000637507	1.00222	0.00320243
ITGAL	ID_36120	AT	7.4064e-05	0.000646366	1.02217	0.0316408
MVB12B	ID_87596	AT	7.42148e-05	0.000646575	0.967505	-0.0476586
MVB12B	ID_87597	AT	7.42148e-05	0.000646575	2.45845	1.29775
SPTB	ID_27908	AT	7.46749e-05	0.000649474	0.717174	-0.479606
SPTB	ID_27909	AT	7.46749e-05	0.000649474	2.53809	1.34374
MSH2	ID_53497	AT	7.52354e-05	0.000653792	1.00755	0.0108494
ARHGAP11A	ID_29816	AT	7.54136e-05	0.000654226	2.12533	1.08768
ARHGAP11A	ID_29817	AT	7.54136e-05	0.000654226	0.936141	-0.0952023
MRPL52	ID_26646	RI	7.60249e-05	0.000658414	1.70949	0.773564
TMEM91	ID_50045	AP	7.60255e-05	0.000658414	1.21201	0.277396
THAP6	ID_69530	AT	7.66359e-05	0.000663137	0.836402	-0.257732
DDX17	ID_62238	AP	7.69421e-05	0.000665223	0.693549	-0.527931
MRPL33	ID_53044	AT	7.72491e-05	0.000666192	0.751479	-0.412195
MRPL33	ID_53045	AT	7.7249e-05	0.000666192	1.04503	0.063538
DDX17	ID_62237	AP	7.72501e-05	0.000666192	1.52727	0.610959
COL4A1	ID_26249	AT	7.7451e-05	0.00066736	1.00115	0.00165389
HP1BP3	ID_937	AP	7.7526e-05	0.000667444	1.31159	0.39132
BABAM1	ID_48259	AA	8.00746e-05	0.000688803	1.34315	0.425616
PPP2R3C	ID_27193	AT	8.1015e-05	0.000696306	0.986751	-0.0192418
ACTR10	ID_27682	ES	8.23375e-05	0.000705889	1.52374	0.607616
RBSN	ID_63548	AT	8.23322e-05	0.000705889	2.07613	1.05389
RBSN	ID_63550	AT	8.23322e-05	0.000705889	0.966206	-0.0495979
TSC22D1	ID_25782	AP	8.26645e-05	0.000706317	2.34508	1.22963
TSC22D1	ID_25783	AP	8.26643e-05	0.000706317	0.967808	-0.0472069
IER3IP1	ID_45442	AT	8.26623e-05	0.000706317	1.04388	0.0619524
IER3IP1	ID_45443	AT	8.26623e-05	0.000706317	0.57558	-0.796912
CD63	ID_22245	AP	8.33148e-05	0.000710742	1.2896	0.366919
KXD1	ID_48461	RI	8.33217e-05	0.000710742	0.978874	-0.0308054
STRA13	ID_44265	ES	8.36607e-05	0.000712443	1.69043	0.757388
PMPCB	ID_81174	AT	8.36545e-05	0.000712443	1.02201	0.0314159
WIBG	ID_22287	AP	8.43281e-05	0.000716929	1.14922	0.200659
SSBP1	ID_82055	AD	8.43271e-05	0.000716929	1.24174	0.312361
SSU72	ID_179	AT	8.49971e-05	0.000720835	0.6383	-0.647694
SSU72	ID_180	AT	8.49972e-05	0.000720835	1.03154	0.0448063
MRPL42	ID_23697	AT	8.49994e-05	0.000720835	0.940127	-0.089072
MADD	ID_15716	ES	8.63485e-05	0.000729932	0.955425	-0.0657862
GAMT	ID_46472	AT	8.63583e-05	0.000729932	1.70878	0.772967
GAMT	ID_46473	AT	8.63582e-05	0.000729932	0.959583	-0.0595205
HDAC10	ID_62795	RI	8.63575e-05	0.000729932	1.63644	0.710559
CLYBL	ID_26186	AT	8.70479e-05	0.000733339	0.598852	-0.739729
PCTP	ID_42587	AT	8.70435e-05	0.000733339	1.03185	0.0452369
IMPA2	ID_44659	AT	8.7049e-05	0.000733339	0.93973	-0.0896814
IMPA2	ID_44660	AT	8.70489e-05	0.000733339	1.83914	0.879029
BTG2	ID_9447	RI	8.72783e-05	0.000734441	1.00003	4.30552e-05
CCDC122	ID_25772	AT	8.73957e-05	0.000734441	0.891323	-0.165979
CCDC122	ID_25773	AT	8.73957e-05	0.000734441	1.21561	0.281679
LRRC27	ID_13494	AT	8.77446e-05	0.000736766	2.24084	1.16404
YIF1B	ID_49608	ES	8.84387e-05	0.000741401	0.643146	-0.636783
NAF1	ID_71009	AT	8.84419e-05	0.000741401	0.642611	-0.637983
ZFAND2B	ID_57627	RI	8.87782e-05	0.000743608	2.34952	1.23236
BRIP1	ID_42892	AT	9.02102e-05	0.000754364	0.572001	-0.80591
BRIP1	ID_42893	AT	9.02099e-05	0.000754364	1.14756	0.198567
MKNK1	ID_2804	AT	9.05669e-05	0.000756727	1.91984	0.940986
GID4	ID_39538	AT	9.09291e-05	0.000758511	1.49118	0.57645
GID4	ID_39539	AT	9.0929e-05	0.000758511	0.936255	-0.095027
RBM3	ID_88997	RI	9.20131e-05	0.000766926	1.95576	0.967731
TMEM97	ID_39875	AT	9.31336e-05	0.000774999	0.99792	-0.00300324
BOLA3	ID_54017	ES	9.31128e-05	0.000774999	1.08926	0.123351
MRGPRF	ID_17356	AT	9.37776e-05	0.000779722	0.998519	-0.00213787
RPL18A	ID_48379	AP	9.5037e-05	0.00078955	0.998548	-0.00209651
PPIG	ID_55871	AT	9.5288e-05	0.000790991	0.983574	-0.023895
MACF1	ID_1877	AT	9.54676e-05	0.000791838	1.00049	0.000700122
ITPKB	ID_10021	AT	9.57246e-05	0.00079268	1.5194	0.6035
ITPKB	ID_10022	AT	9.57246e-05	0.00079268	0.893216	-0.162919
CLCN6	ID_688	AT	9.61035e-05	0.000794536	1.29074	0.3682
ACAA1	ID_64017	AD	9.61044e-05	0.000794536	1.24362	0.314543
SH3BP5	ID_63567	ES	9.68561e-05	0.000800102	1.98209	0.987024
ZNF726	ID_48833	AT	9.84028e-05	0.000812221	2.03712	1.02653
TAF1D	ID_18309	AT	9.91825e-05	0.000817335	1.0851	0.117834
ZP3	ID_80168	AP	9.91817e-05	0.000817335	0.646247	-0.629842
ANO6	ID_21297	AT	9.99615e-05	0.000821156	0.976439	-0.0343978
UBE3B	ID_24308	AT	9.99631e-05	0.000821156	1.53968	0.622633
GCHFR	ID_30032	AT	9.9957e-05	0.000821156	1.07693	0.106926
ZNF493	ID_48770	AT	9.99683e-05	0.000821156	1.3081	0.387473
MICAL2	ID_14418	AT	0.000100363	0.000823738	1.26192	0.335618
TTLL3	ID_63199	AP	0.000100638	0.000825325	1.04569	0.0644515
FBXO3	ID_14929	RI	0.000100759	0.000825658	1.45499	0.541009
C19orf44	ID_48169	AT	0.000101155	0.000827578	0.884245	-0.177482
C19orf44	ID_48170	AT	0.000101156	0.000827578	1.08305	0.115101
USP48	ID_994	AP	0.000101555	0.000828852	1.47328	0.559034
USP48	ID_995	AP	0.000101555	0.000828852	0.705347	-0.503596
MSI2	ID_42617	AT	0.000101554	0.000828852	0.912512	-0.132085
AES	ID_46657	AP	0.000102356	0.00083472	0.699473	-0.51566
SEC14L1	ID_43701	AP	0.000102758	0.000836664	0.636702	-0.65131
TMEM44	ID_68159	AT	0.000102758	0.000836664	1.0687	0.0958546
TMEM108	ID_66827	AT	0.000103176	0.000838055	0.659776	-0.599952
TMEM108	ID_66828	AT	0.000103176	0.000838055	2.06264	1.04449
DDHD2	ID_83376	AP	0.000103099	0.000838055	1.26672	0.3411
NPHP1	ID_54927	AT	0.000104388	0.00084321	1.45882	0.544805
NPHP1	ID_54928	AT	0.000104388	0.00084321	0.771003	-0.375192
LIMK2	ID_61835	AT	0.000104387	0.00084321	1.20841	0.273105
LIMK2	ID_61836	AT	0.000104387	0.00084321	0.936663	-0.0943986
RPL22L1	ID_67619	AA	0.000104389	0.00084321	1.49129	0.576565
PCMTD1	ID_83807	AT	0.000104385	0.00084321	0.969243	-0.0450701
PCMTD1	ID_83808	AT	0.000104385	0.00084321	1.65322	0.725282
YAF2	ID_21104	AT	0.000105206	0.000847846	1.5793	0.659283
YAF2	ID_21105	AT	0.000105206	0.000847846	0.962385	-0.0553134
UBE2D3	ID_70119	AP	0.000105212	0.000847846	1.41676	0.502597
PDLIM5	ID_69971	AT	0.000106456	0.000857195	1.09708	0.133666
ZNF506	ID_48683	AT	0.000106876	0.000859901	1.26682	0.34121
DNAJB12	ID_12092	AD	0.000107295	0.000861927	1.11617	0.158557
PHLPP2	ID_37476	AT	0.000107297	0.000861927	0.820982	-0.284577
RNF14	ID_73843	ES	0.000109238	0.000876827	1.02507	0.0357181
ARL6IP4	ID_25027	AA	0.000109377	0.000877254	0.983711	-0.0236933
NAA38	ID_39063	RI	0.000110712	0.000887264	0.682433	-0.551242
EPHB4	ID_80998	ES	0.000111266	0.000891001	0.990044	-0.0144353
NBR1	ID_41694	AT	0.000112331	0.000898828	0.995469	-0.00655233
VAMP8	ID_54289	AP	0.00011269	0.00090099	1.05247	0.0737856
DRAP1	ID_16951	AP	0.000112894	0.000901652	1.02129	0.0303889
DCN	ID_23661	ES	0.00011295	0.000901652	0.999954	-6.573e-05
ADAMTS2	ID_74891	AT	0.000113343	0.000903381	0.653693	-0.613314
ADAMTS2	ID_74892	AT	0.000113343	0.000903381	1.21137	0.27664
UBE2K	ID_69077	ES	0.000114309	0.000909654	0.99673	-0.00472563
IK	ID_73709	ES	0.000114232	0.000909654	1.47568	0.561378
USB1	ID_36626	AT	0.000114673	0.000910445	1.79941	0.847521
GALK1	ID_43493	AT	0.000114676	0.000910445	1.71569	0.778792
GALK1	ID_43494	AT	0.000114676	0.000910445	0.876202	-0.190665
ING3	ID_81585	AT	0.00011558	0.000916198	1.24688	0.318326
ING3	ID_81586	AT	0.00011558	0.000916198	0.740322	-0.433774
FTH1	ID_16330	AT	0.000115671	0.000916208	1.00011	0.000152728
ABCD4	ID_28376	RI	0.000116485	0.000921936	0.811987	-0.300472
CD2BP2	ID_36096	AP	0.00011745	0.000928854	0.981751	-0.0265707
RC3H2	ID_87487	AT	0.000118318	0.000934993	1.67489	0.744064
NGDN	ID_26756	RI	0.000118774	0.000936423	1.87828	0.90941
CCDC36	ID_64847	AT	0.000118691	0.000936423	1.14156	0.191009
CCDC36	ID_64848	AT	0.000118691	0.000936423	0.421107	-1.24774
PDLIM2	ID_83023	AT	0.000119054	0.000937903	0.995461	-0.00656377
KIF1B	ID_602	AT	0.000119246	0.000938695	1.19773	0.260301
METTL10	ID_13407	ES	0.000119702	0.000941559	0.875717	-0.191463
WBP2	ID_43522	ES	0.000120175	0.000943122	1.47991	0.565508
RBFOX2	ID_61985	ES	0.000120174	0.000943122	0.8824	-0.180495
CCDC66	ID_65343	AT	0.000120178	0.000943122	0.849474	-0.235358
ALDH6A1	ID_28366	AP	0.00012063	0.000945212	0.652261	-0.616478
ALDH6A1	ID_28367	AP	0.00012063	0.000945212	1.31358	0.393505
INO80E	ID_36018	AA	0.000121591	0.000952012	0.692521	-0.530069
ACSM3	ID_34386	AT	0.000122123	0.000954712	0.919119	-0.121676
ACSM3	ID_34387	AT	0.000122123	0.000954712	2.56833	1.36083
MYO18A	ID_40038	ES	0.000123016	0.000960955	0.551101	-0.859611
EXOC3	ID_71441	RI	0.000124464	0.000971521	2.16734	1.11593
TRNT1	ID_62977	AT	0.000124948	0.000974559	1.09731	0.133971
TCOF1	ID_74066	AT	0.000125431	0.000976828	0.724077	-0.465784
TCOF1	ID_74068	AT	0.000125431	0.000976828	1.0302	0.0429259
RPP38	ID_10860	AT	0.000125919	0.000976937	1.06018	0.0843075
RPP38	ID_10861	AT	0.000125919	0.000976937	0.659972	-0.599524
ZNF174	ID_33571	AT	0.000125924	0.000976937	1.60888	0.686055
ZNF174	ID_33572	AT	0.000125924	0.000976937	0.902877	-0.147399
PCNP	ID_65960	ES	0.000125907	0.000976937	1.03301	0.0468486
PYCR1	ID_44243	RI	0.000126281	0.000978967	0.989067	-0.0158602
ZNF614	ID_51396	AT	0.000127897	0.000989992	0.752634	-0.409979
ZNF614	ID_51397	AT	0.000127897	0.000989992	1.614	0.690639
ELP5	ID_38889	RI	0.000130908	0.00101253	0.755596	-0.404313
EML2	ID_50497	ES	0.000131294	0.00101474	0.986105	-0.0201866
MRPL55	ID_10071	ES	0.000131414	0.0010149	1.96594	0.97522
KLHL7	ID_78950	AT	0.000131929	0.00101811	0.761484	-0.393115
XRCC3	ID_29495	AT	0.000133987	0.00103087	0.775022	-0.367691
XRCC3	ID_29496	AT	0.000133987	0.00103087	1.04504	0.0635561
ARSB	ID_72613	AT	0.000133987	0.00103087	1.77301	0.826203
ARSB	ID_72614	AT	0.000133987	0.00103087	0.946051	-0.0800095
ZNF772	ID_52253	AT	0.000134416	0.00103339	1.13304	0.180196
CD96	ID_66048	AT	0.000134733	0.00103505	2.17232	1.11923
NMRAL1	ID_33738	RI	0.000135555	0.00103902	1.67065	0.740407
ZNF785	ID_36161	AT	0.000135553	0.00103902	0.91357	-0.130413
ZNF785	ID_36162	AT	0.000135553	0.00103902	1.09478	0.130643
PTP4A2	ID_1523	ES	0.000135941	0.00104041	0.996986	-0.00435465
MYH9	ID_62046	AT	0.00013594	0.00104041	1.00037	0.000537064
QTRT1	ID_47582	RI	0.000136608	0.00104474	1.61466	0.691232
SIGMAR1	ID_86191	ES	0.00013749	0.00105069	0.989752	-0.0148612
MRPL19	ID_54157	AT	0.000137667	0.00105126	1.13446	0.182
KMT2C	ID_82412	AP	0.000139803	0.00106597	0.626335	-0.674993
KMT2C	ID_82413	AP	0.000139803	0.00106597	1.35679	0.440196
RNF7	ID_67080	AD	0.000140887	0.00107344	0.978612	-0.0311904
CCDC107	ID_86266	RI	0.000141439	0.00107684	1.3881	0.47311
JTB	ID_7777	RI	0.000142505	0.00108358	1.01405	0.0201232
WDR55	ID_73716	RI	0.000142537	0.00108358	0.952029	-0.0709227
STK32C	ID_13485	AP	0.00014444	0.00109723	4.35647	2.12316
POLR3GL	ID_7278	ES	0.000144921	0.0010993	0.976658	-0.0340739
IFRD2	ID_64980	ES	0.000144928	0.0010993	1.00845	0.012137
SHISA9	ID_34062	AT	0.0001453	0.00110048	0.805889	-0.311347
SHISA9	ID_34063	AT	0.0001453	0.00110048	1.01276	0.0182855
SLC7A7	ID_26621	AP	0.00014562	0.00110209	0.449719	-1.1529
CSTF3	ID_14886	RI	0.000145873	0.00110318	1.64591	0.718885
TAF5L	ID_10229	AT	0.000147	0.00110927	0.684891	-0.546053
SLC39A6	ID_45208	AT	0.000146804	0.00110927	0.997589	-0.00348213
SRSF7	ID_53276	RI	0.000147004	0.00110927	1.37738	0.461931
ARHGAP27	ID_41964	AT	0.000149278	0.00112397	0.972771	-0.0398275
ARHGAP27	ID_41965	AT	0.000149278	0.00112397	1.80065	0.848517
TMEM44	ID_68156	AT	0.000149283	0.00112397	0.731361	-0.451344
DDRGK1	ID_58576	AT	0.000149856	0.00112663	0.961654	-0.0564107
DDRGK1	ID_58577	AT	0.000149856	0.00112663	1.87684	0.908307
YIF1A	ID_17008	ES	0.000151007	0.00113361	0.977422	-0.0329463
RPL26	ID_39176	AT	0.000151003	0.00113361	0.998861	-0.00164359
KLHL7	ID_78952	AT	0.00015336	0.00114958	1.46206	0.547999
SYPL1	ID_81328	ES	0.000153352	0.00114958	1.80109	0.848868
JMJD8	ID_32952	ES	0.000153754	0.00115102	0.983424	-0.0241143
RPL31	ID_54735	RI	0.000153778	0.00115102	1.23759	0.307539
LGALS3	ID_27617	AT	0.000155127	0.00115942	0.974926	-0.036635
USB1	ID_36625	AT	0.000155128	0.00115942	0.96384	-0.0531345
USP5	ID_19988	AD	0.000155719	0.00116299	0.667283	-0.583629
TMBIM4	ID_22889	AP	0.000156591	0.00116864	0.992458	-0.0109222
NPEPPS	ID_42076	AT	0.000156931	0.00116947	1.81138	0.857087
NPEPPS	ID_42078	AT	0.000156931	0.00116947	0.945481	-0.0808793
PAM16	ID_33651	AT	0.000157409	0.0011714	1.01099	0.0157641
PCBD2	ID_73438	AT	0.000157534	0.0011714	1.06732	0.0939967
PCBD2	ID_73439	AT	0.000157534	0.0011714	0.744622	-0.425419
ZMYND11	ID_10585	AT	0.000158126	0.00117495	0.985529	-0.0210292
ADAMTS9	ID_65526	AT	0.000158257	0.00117507	1.0199	0.0284302
POLD4	ID_17172	AD	0.000158743	0.00117782	1.05003	0.0704342
TAF1D	ID_18313	RI	0.000159359	0.00117981	1.48433	0.569814
MBP	ID_45844	AT	0.000159357	0.00117981	1.12768	0.173358
SNX3	ID_77149	AD	0.000159342	0.00117981	1.0119	0.0170646
ARL16	ID_44149	ES	0.000160585	0.00118803	1.5328	0.616172
SRSF2	ID_43660	RI	0.000161199	0.00119084	0.951836	-0.0712156
HIBCH	ID_56560	ES	0.00016115	0.00119084	0.939968	-0.0893162
ATP5G1	ID_42237	AT	0.00016296	0.00120298	0.994389	-0.00811768
ZBTB43	ID_87600	AP	0.000164516	0.00121271	1.37704	0.461569
ZBTB43	ID_87601	AP	0.000164516	0.00121271	0.629625	-0.667436
CCPG1	ID_30726	RI	0.000164932	0.0012149	1.19044	0.25149
RSRP1	ID_1140	AP	0.000165578	0.0012179	1.13537	0.183168
RSRP1	ID_1141	AP	0.000165578	0.0012179	0.57981	-0.786347
TUBA1A	ID_21538	AP	0.000166208	0.00122165	0.95384	-0.0681812
SLC39A13	ID_15738	RI	0.000166741	0.00122469	0.982161	-0.0259692
MIER1	ID_3336	AT	0.000168714	0.00123785	1.0071	0.0102021
SCAF11	ID_21316	AP	0.000168775	0.00123785	0.867276	-0.205437
LGALS3BP	ID_43928	AT	0.000170004	0.00124459	0.993664	-0.00917005
CAMKMT	ID_53453	AT	0.000170061	0.00124459	2.45594	1.29627
SOGA1	ID_59324	RI	0.00016999	0.00124459	1.00181	0.00260955
PTPRC	ID_9320	AT	0.000172686	0.00126289	0.88201	-0.181133
CEP57	ID_18388	AT	0.00017467	0.00127558	1.3359	0.417816
CEP57	ID_18390	AT	0.00017467	0.00127558	0.961964	-0.0559445
UBE2D2	ID_73622	ES	0.000175989	0.00128429	1.48371	0.569211
TIMM10B	ID_14146	RI	0.000177085	0.00129137	0.962942	-0.0544798
NPIPB3	ID_34444	AP	0.000177358	0.00129244	1.70944	0.773524
SERP1	ID_67274	ES	0.000177762	0.00129445	1.00236	0.0034054
ZNF528	ID_51455	AT	0.000178035	0.00129552	1.2168	0.283087
ROMO1	ID_59225	RI	0.000178712	0.00129951	1.49515	0.580292
TAF5L	ID_10228	AT	0.000179389	0.00130351	1.06774	0.0945639
KIF1B	ID_601	AT	0.000180767	0.00131259	0.747937	-0.419011
MAPK13	ID_75950	AT	0.000180976	0.00131317	0.996189	-0.00550908
ELMOD2	ID_70658	AT	0.00018448	0.00133764	0.982348	-0.0256945
ITGB1BP1	ID_52616	RI	0.000184931	0.00133996	1.63161	0.706296
MAP1LC3B	ID_37942	AT	0.000187698	0.00135904	0.997019	-0.00430654
TMEM63A	ID_10001	AT	0.000189549	0.00137147	0.974245	-0.0376437
PPP1CC	ID_24501	AT	0.000190566	0.00137741	0.993229	-0.00980231
TRAPPC2	ID_88516	RI	0.000190639	0.00137741	0.899887	-0.152183
CDYL	ID_75231	AP	0.00019208	0.00138683	0.269975	-1.8891
PLEKHO1	ID_7427	ES	0.000193788	0.00139818	1.00173	0.00249053
RBM48	ID_80441	RI	0.000195757	0.00141139	1.69391	0.760356
GNAI2	ID_64971	ES	0.000196865	0.00141838	1.00055	0.000794925
ANAPC11	ID_44211	ES	0.000197254	0.00142017	0.902591	-0.147855
DNAJC2	ID_81185	AT	0.000197996	0.00142351	1.05216	0.0733555
DNAJC2	ID_81187	AT	0.000197996	0.00142351	0.716527	-0.480906
TAGLN	ID_18894	AP	0.000200138	0.00143789	0.977467	-0.0328804
STAT3	ID_41034	AA	0.000201008	0.00144312	0.975257	-0.0361461
WDR33	ID_55244	AT	0.000202546	0.00145315	1.10289	0.141286
OCIAD1	ID_69253	AD	0.000203312	0.00145762	0.794365	-0.332126
CBX2	ID_44005	AT	0.00020648	0.00147826	0.979396	-0.030036
ANTXR1	ID_53845	AT	0.000206409	0.00147826	0.927687	-0.10829
CD99L2	ID_90358	AT	0.000207299	0.00148307	0.978611	-0.0311923
PTPRC	ID_9321	AT	0.000207971	0.00148684	3.69403	1.8852
B3GALNT2	ID_10352	AT	0.000208757	0.00149037	0.936442	-0.094739
B3GALNT2	ID_10353	AT	0.000208757	0.00149037	1.40295	0.488468
ARFRP1	ID_60152	AP	0.000209545	0.00149495	0.928448	-0.107107
RTKN2	ID_11871	AT	0.00021193	0.00151091	0.486477	-1.03956
ANKRD54	ID_62161	AP	0.000213519	0.00152023	0.775051	-0.367638
2021-09-06	ID_89964	AT	0.000213535	0.00152023	0.85425	-0.22727
C22orf39	ID_61055	AT	0.000216776	0.00154222	1.15451	0.207276
EPB41L5	ID_55145	AT	0.000217592	0.00154588	1.35161	0.434679
EPB41L5	ID_55146	AT	0.000217592	0.00154588	0.528664	-0.919577
ANTXR1	ID_53844	AT	0.000220061	0.00156233	1.4033	0.488824
IRF3	ID_50986	ES	0.000221017	0.00156802	0.996167	-0.00554073
TUBA1A	ID_21537	AP	0.00022171	0.00157185	2.46816	1.30344
HSP90AA1	ID_29330	AP	0.000222531	0.00157567	0.979786	-0.0294616
MRPL35	ID_54419	RI	0.000222558	0.00157567	0.915832	-0.126846
DFFA	ID_616	AT	0.000223396	0.00157941	1.34526	0.42788
DFFA	ID_617	AT	0.000223396	0.00157941	0.878508	-0.186872
MRPS27	ID_72451	AT	0.000224758	0.00158794	0.99409	-0.00855143
PFDN5	ID_22008	ES	0.000225267	0.00159043	0.689591	-0.536188
ACAA1	ID_64016	AT	0.000225889	0.00159372	0.986787	-0.0191888
BECN1	ID_41137	ES	0.000228465	0.00161078	0.984189	-0.0229929
ABCA3	ID_33265	AT	0.000229339	0.00161471	2.02078	1.01492
ABCA3	ID_33266	AT	0.000229339	0.00161471	0.815437	-0.294355
ANK3	ID_11846	AT	0.000230031	0.00161637	0.934953	-0.0970346
ANK3	ID_11847	AT	0.000230031	0.00161637	2.37555	1.24826
TMEM101	ID_41753	AT	0.00023005	0.00161637	0.992534	-0.0108112
FAM178A	ID_12842	AT	0.00023107	0.00161798	0.907506	-0.140021
B2M	ID_30360	ES	0.000230888	0.00161798	1.00361	0.00520362
C16orf52	ID_35533	AT	0.000231069	0.00161798	1.46271	0.548646
IDS	ID_90286	AP	0.000231072	0.00161798	2.11447	1.08029
IDS	ID_90287	AP	0.000231072	0.00161798	0.794272	-0.332295
MICAL2	ID_14416	AT	0.000231934	0.00162179	0.887554	-0.172093
LSM5	ID_79189	AP	0.000231921	0.00162179	1.13892	0.187661
DIMT1	ID_72181	AT	0.000232797	0.0016256	1.8267	0.869236
DIMT1	ID_72182	AT	0.000232797	0.0016256	0.974774	-0.0368605
AHNAK	ID_16347	AT	0.000233682	0.00162955	1.84644	0.884743
AHNAK	ID_16348	AT	0.000233682	0.00162955	0.913903	-0.129887
C6orf62	ID_75532	AD	0.000236295	0.00164664	0.990959	-0.0131029
TMEM68	ID_83868	AT	0.000238088	0.00165687	1.03907	0.0552889
TMEM68	ID_83869	AT	0.000238088	0.00165687	0.721532	-0.470865
UBE2F	ID_58156	ES	0.000238782	0.00166057	0.994999	-0.00723365
SQSTM1	ID_74933	AP	0.000238987	0.00166086	1.49385	0.57904
CALHM2	ID_13012	AA	0.000240782	0.0016722	1.34336	0.425847
SMIM7	ID_48187	RI	0.000241684	0.00167618	0.958694	-0.0608572
TAF9	ID_72344	AP	0.000241683	0.00167618	2.19208	1.1323
ZNF346	ID_74698	AT	0.000242586	0.00168015	1.03516	0.0498551
ZNF346	ID_74699	AT	0.000242586	0.00168015	0.756641	-0.402319
LUC7L3	ID_42476	RI	0.000245329	0.00169684	1.21263	0.27814
SEC61G	ID_79736	AD	0.00024531	0.00169684	0.979532	-0.0298353
MB21D1	ID_76743	AT	0.00024555	0.00169722	1.02845	0.0404702
RBM41	ID_89815	AT	0.000246245	0.00170088	1.2251	0.292894
RALY	ID_59017	ES	0.000247165	0.00170607	1.04757	0.0670483
TUBGCP2	ID_13529	AP	0.000248091	0.001709	0.801812	-0.318664
NAP1L1	ID_23467	AP	0.000248089	0.001709	0.92593	-0.111024
NAP1L1	ID_23468	AP	0.000248089	0.001709	1.41482	0.50062
ZNF568	ID_49431	AT	0.000249019	0.00171423	1.24844	0.320126
DNTTIP2	ID_3797	ES	0.000249274	0.00171483	0.994688	-0.00768452
FASTK	ID_82333	RI	0.000249946	0.00171829	1.51416	0.598514
POLR2J3	ID_81117	AA	0.000251823	0.00173004	1.44806	0.534116
ARL5A	ID_55593	AT	0.000252048	0.00173041	0.970981	-0.0424848
SLC2A11	ID_61342	AT	0.000252916	0.00173287	0.946493	-0.0793366
SYNPO	ID_74103	AT	0.000252752	0.00173287	0.691146	-0.532937
SYNPO	ID_74104	AT	0.000252751	0.00173287	1.02701	0.0384464
GUSB	ID_79855	ES	0.000253705	0.00173711	1.10863	0.148773
ATP5J2	ID_80643	ES	0.000254625	0.00174225	0.98784	-0.0176514
ZNF226	ID_50292	RI	0.000255601	0.00174658	1.9044	0.929334
ATF4	ID_62313	RI	0.000255597	0.00174658	2.32403	1.21663
B9D1	ID_39710	AT	0.000257514	0.0017573	1.16675	0.222493
C22orf39	ID_61054	AT	0.000257514	0.0017573	0.720597	-0.472736
ALG8	ID_18011	ES	0.000258468	0.00176263	0.712861	-0.488307
APOL1	ID_62023	ES	0.000259048	0.0017654	1.03184	0.0452216
2021-09-06	ID_89963	AT	0.000259441	0.0017669	1.31832	0.398701
POLR2F	ID_62180	AT	0.000260408	0.0017723	0.838406	-0.254279
PLCB1	ID_58672	AT	0.000261526	0.00177754	0.956442	-0.0642502
PLCB1	ID_58673	AT	0.000261526	0.00177754	2.48961	1.31592
ZNF747	ID_36148	AT	0.000263326	0.00178502	0.785061	-0.349124
ZNF747	ID_36150	AT	0.000263326	0.00178502	1.06795	0.0948486
RPL39L	ID_68070	AP	0.000263322	0.00178502	1.52505	0.608854
RPL39L	ID_68071	AP	0.000263322	0.00178502	0.535288	-0.901612
EEF1D	ID_85442	ES	0.000264299	0.00179043	1.01903	0.0271979
RFC3	ID_25610	AT	0.000265841	0.00179968	1.02354	0.0335707
PSENEN	ID_49282	AA	0.000267255	0.00180805	1.01885	0.0269388
ABL2	ID_9103	AT	0.000268119	0.00181009	1.05087	0.0715862
CEP135	ID_69337	AT	0.000268207	0.00181009	1.0598	0.0837945
CEP135	ID_69338	AT	0.000268207	0.00181009	0.514324	-0.959249
CREB3L2	ID_81911	AT	0.000268266	0.00181009	0.930269	-0.10428
RABEP2	ID_35888	AP	0.000270064	0.00181981	1.93072	0.949142
RABEP2	ID_35889	AP	0.000270064	0.00181981	0.785649	-0.348043
NFE2L2	ID_56131	AT	0.000271291	0.00182566	0.995486	-0.00652763
CBWD1	ID_85691	ES	0.000271249	0.00182566	1.04335	0.0612238
RNF6	ID_25511	AP	0.000273028	0.00183615	0.753147	-0.408996
MED31	ID_38771	ES	0.000273226	0.00183627	0.935682	-0.09591
METTL5	ID_55895	AD	0.000275327	0.00184917	1.16985	0.226321
ZNF568	ID_49433	AT	0.000276353	0.00185483	0.826692	-0.274579
DNAL4	ID_62264	AT	0.000279165	0.00187248	0.994574	-0.00784905
FASTK	ID_82332	RI	0.000279434	0.00187305	1.63188	0.706532
GATB	ID_70844	AT	0.000280476	0.0018788	0.952864	-0.0696585
WDR6	ID_64794	RI	0.000281521	0.00188333	1.79312	0.842471
CDYL	ID_75229	AP	0.000281499	0.00188333	1.21702	0.28335
PMPCB	ID_81180	ES	0.000283596	0.00189597	0.972987	-0.0395074
DDX6	ID_19049	AT	0.00028535	0.00190644	0.990036	-0.014447
SUPT4H1	ID_42667	AD	0.000285708	0.00190746	0.795978	-0.3292
C8orf34	ID_84100	AT	0.000285876	0.00190746	0.433083	-1.20728
PVRL2	ID_50348	AT	0.000288909	0.00192266	1.36149	0.445188
PVRL2	ID_50349	AT	0.000288909	0.00192266	0.849838	-0.23474
IRF3	ID_50984	ES	0.000288344	0.00192266	0.984675	-0.0222807
VPS28	ID_85603	RI	0.000288897	0.00192266	1.832	0.873423
CALCOCO2	ID_42234	ES	0.000289301	0.00192402	1.02757	0.0392414
SMIM4	ID_65229	AT	0.000289977	0.00192601	1.36213	0.445867
SMIM4	ID_65230	AT	0.000289977	0.00192601	0.656264	-0.607651
CIRBP	ID_46445	ES	0.000291044	0.00192808	1.44648	0.532549
ACYP2	ID_53566	AT	0.000291043	0.00192808	0.950603	-0.0730845
APMAP	ID_58855	ES	0.000291018	0.00192808	1.01571	0.0224817
KCNMB3	ID_67680	AP	0.000291046	0.00192808	1.68468	0.752471
SARNP	ID_22251	AT	0.000293208	0.00193864	0.750584	-0.413915
ZNF836	ID_51413	AT	0.000293209	0.00193864	0.762905	-0.390424
ZNF836	ID_51414	AT	0.000293209	0.00193864	1.33182	0.413394
TBC1D8B	ID_89808	AT	0.000295379	0.00195172	0.655746	-0.60879
CACYBP	ID_9039	AP	0.00029976	0.00197939	0.761193	-0.393666
ADCK1	ID_28635	ES	0.000300687	0.00198422	1.18196	0.241186
COX11	ID_42569	RI	0.000300885	0.00198425	1.41716	0.503003
EEF1D	ID_85444	ES	0.000301974	0.00199014	0.97859	-0.0312234
ITGB1BP1	ID_52612	AP	0.000303111	0.00199506	0.810393	-0.303307
ITGB1BP1	ID_52613	AP	0.000303111	0.00199506	1.18209	0.241337
ZNF670	ID_10508	AT	0.000303744	0.00199793	4.99359	2.32008
EXOC7	ID_43561	AT	0.000305251	0.00200655	0.992047	-0.0115196
RNH1	ID_13662	AP	0.000307607	0.00201944	1.28369	0.3603
C11orf57	ID_18723	RI	0.000307599	0.00201944	1.30993	0.389487
COMMD4	ID_31843	AT	0.000309871	0.00203168	0.658016	-0.603806
COMMD4	ID_31844	AT	0.00030987	0.00203168	1.04064	0.0574664
EDF1	ID_88230	RI	0.000311006	0.00203782	1.51292	0.59734
ZFYVE28	ID_68561	AT	0.000314473	0.00205921	1.73355	0.793733
FARP1	ID_26165	AT	0.000316767	0.00207291	0.983836	-0.0235098
C12orf57	ID_20019	AT	0.000317085	0.00207365	0.99749	-0.00362613
ZNF493	ID_48769	AT	0.000320312	0.00209341	0.83617	-0.258131
MRPL49	ID_16789	ES	0.000321543	0.00209475	1.00516	0.00743094
MBLAC2	ID_72765	AT	0.000321445	0.00209475	1.92053	0.941504
MBLAC2	ID_72766	AT	0.000321445	0.00209475	0.950928	-0.0725917
CEP78	ID_86655	AT	0.000321491	0.00209475	0.69993	-0.514717
CEP78	ID_86656	AT	0.000321491	0.00209475	1.17118	0.227964
GABRE	ID_90379	AT	0.000322278	0.0020982	0.417869	-1.25888
PCBP2	ID_22056	ES	0.000323851	0.00210447	1.03863	0.0546817
ANKRD10	ID_26270	AT	0.000323859	0.00210447	1.43208	0.518108
ANKRD10	ID_26271	AT	0.000323859	0.00210447	0.808049	-0.307485
DNAJB1	ID_47990	AP	0.000325471	0.00211211	0.993919	-0.00879939
MPST	ID_62071	AP	0.000325657	0.00211211	1.99214	0.994319
MPST	ID_62072	AP	0.000325657	0.00211211	0.934926	-0.097076
DYNLT3	ID_88789	AT	0.000326233	0.00211316	0.966974	-0.0484514
DYNLT3	ID_88790	AT	0.000326233	0.00211316	1.49988	0.584849
MLST8	ID_33220	ES	0.000327356	0.00211696	1.02974	0.0422748
CEP57L1	ID_77160	AT	0.000327438	0.00211696	1.11138	0.152355
ZNF169	ID_86927	AT	0.000327441	0.00211696	0.765952	-0.384675
TIGD6	ID_74053	AD	0.000329221	0.00212712	1.12627	0.171557
PRICKLE4	ID_76139	AA	0.000329848	0.00212982	0.871474	-0.198471
MGAT4A	ID_54653	AT	0.00033102	0.00213358	0.5771	-0.793107
MGAT4A	ID_54655	AT	0.00033102	0.00213358	1.07191	0.100177
UQCR10	ID_61665	AD	0.000331059	0.00213358	1.234	0.303346
RBBP6	ID_35642	AT	0.00033228	0.0021374	1.13009	0.176436
RBBP6	ID_35643	AT	0.000332279	0.0021374	0.702742	-0.508932
EGFR	ID_79744	AT	0.000332112	0.0021374	0.977082	-0.0334485
CARF	ID_56965	AT	0.000337171	0.0021675	0.797968	-0.325597
USP39	ID_54316	RI	0.000338413	0.00217411	0.958174	-0.061641
NSUN5	ID_79935	RI	0.000340902	0.00218873	1.39032	0.47542
IFNLR1	ID_1094	AT	0.000341304	0.00218993	0.897113	-0.156638
UHRF2	ID_85819	AT	0.00034212	0.00219378	0.984015	-0.0232473
GNAI2	ID_64968	AP	0.000343406	0.00220064	1.57838	0.658445
ZNF814	ID_52354	AT	0.000344667	0.00220595	0.67891	-0.558707
ATP5J	ID_60269	AD	0.000344664	0.00220595	0.934208	-0.098184
SARNP	ID_22253	AT	0.000345926	0.00221262	1.16114	0.215546
PGPEP1	ID_48419	AT	0.000347633	0.00222215	0.981747	-0.0265773
PQLC1	ID_46259	ES	0.000348468	0.00222609	0.899215	-0.153262
CCDC34	ID_14751	AT	0.000349727	0.00222718	1.02679	0.0381464
SLC3A2	ID_16463	AP	0.00034973	0.00222718	2.38867	1.2562
CDH5	ID_36704	AT	0.000348984	0.00222718	1.00814	0.0116973
DCAKD	ID_41930	AT	0.000349726	0.00222718	1.74909	0.806602
DCAKD	ID_41931	AT	0.000349725	0.00222718	0.967494	-0.0476758
ANKRD42	ID_18052	AT	0.000358788	0.00227917	0.667118	-0.583987
PARP11	ID_19762	AT	0.000358491	0.00227917	1.04165	0.0588679
TM9SF1	ID_26891	AP	0.000358785	0.00227917	0.888636	-0.170336
TM9SF1	ID_26892	AP	0.000358785	0.00227917	1.37107	0.455306
MMP11	ID_61322	AA	0.000361169	0.00229287	1.01256	0.018003
UBAP2	ID_86129	AP	0.000361586	0.00229409	0.472294	-1.08224
NEK11	ID_66783	AT	0.00036273	0.00229992	0.933722	-0.0989356
SEH1L	ID_44727	AA	0.000363708	0.00230469	1.02161	0.0308467
SGSM3	ID_62346	RI	0.000364062	0.0023055	1.42052	0.506423
SPCS2	ID_17804	ES	0.000368544	0.00233244	0.99486	-0.0074351
ATP9B	ID_46230	AT	0.000369398	0.00233639	1.09501	0.130941
IRF3	ID_51012	ES	0.000371788	0.00235005	0.962078	-0.0557738
CRIP1	ID_29652	AT	0.000374816	0.00236479	0.872735	-0.196385
CRIP1	ID_29653	AT	0.000374816	0.00236479	1.88345	0.913375
GRK6	ID_74764	AT	0.000374804	0.00236479	0.96986	-0.0441521
ATP9B	ID_46232	AT	0.000376178	0.00237192	0.731597	-0.45088
SLC50A1	ID_7940	AP	0.000380291	0.00238464	0.645965	-0.630473
SLC50A1	ID_7941	AP	0.000380291	0.00238464	1.06212	0.0869415
KBTBD3	ID_18556	AT	0.000379994	0.00238464	0.917902	-0.123589
KBTBD3	ID_18557	AT	0.000379994	0.00238464	2.21165	1.14512
KIF16B	ID_58720	AT	0.000378923	0.00238464	0.920897	-0.118888
KIF16B	ID_58721	AT	0.000378922	0.00238464	1.63909	0.712895
RBM6	ID_64932	AT	0.000380298	0.00238464	0.602812	-0.73022
RBM6	ID_64934	AT	0.000380298	0.00238464	1.07032	0.0980462
GTF2H2C	ID_72386	AT	0.000378896	0.00238464	1.46755	0.553405
YIPF1	ID_3074	ES	0.000381682	0.00239184	0.872108	-0.197422
INADL	ID_3239	AT	0.000383077	0.00239911	0.887362	-0.172406
DCAF8	ID_8439	AT	0.000384455	0.00240332	1.54133	0.624173
DCAF8	ID_8440	AT	0.000384455	0.00240332	0.972426	-0.0403392
CFLAR	ID_56795	AT	0.000384455	0.00240332	0.470511	-1.0877
TAF1D	ID_18310	AT	0.000385862	0.00241063	0.792104	-0.336237
WDR62	ID_49337	RI	0.000386318	0.00241201	0.891677	-0.165407
RASGEF1B	ID_69694	AT	0.000388668	0.00242223	0.951618	-0.0715458
RASGEF1B	ID_69695	AT	0.000388668	0.00242223	1.87819	0.909347
EXOSC3	ID_86444	AT	0.000388659	0.00242223	0.858342	-0.220376
TRAPPC1	ID_39077	ES	0.000391669	0.00243944	1.00301	0.00433202
MSI2	ID_42616	AT	0.000394353	0.00245466	1.56954	0.650343
TBC1D10A	ID_61714	AP	0.000395782	0.00246058	1.68191	0.750101
LEPROTL1	ID_83274	AT	0.000395786	0.00246058	0.867234	-0.205507
ILF2	ID_7754	AT	0.000399261	0.00248067	1.00173	0.00249153
NRP2	ID_57106	AT	0.000403013	0.00250246	0.671246	-0.575086
GSTK1	ID_82077	AT	0.000405928	0.0025175	1.04123	0.058287
GSTK1	ID_82078	AT	0.000405929	0.0025175	0.682786	-0.550495
CPNE1	ID_59198	ES	0.000407416	0.00252519	0.763969	-0.388414
BMP8B	ID_1911	AT	0.000408892	0.00253126	0.643622	-0.635715
BMP8B	ID_1912	AT	0.000408892	0.00253126	1.21375	0.279465
PPP1R14B	ID_16606	AP	0.000410345	0.00253274	0.986217	-0.0200236
CDCA3	ID_19983	AT	0.000410369	0.00253274	1.19308	0.25469
CDCA3	ID_19984	AT	0.000410369	0.00253274	0.465201	-1.10407
HARS	ID_73719	AP	0.000410373	0.00253274	0.811999	-0.30045
HARS	ID_73720	AP	0.000410373	0.00253274	1.27773	0.353585
ATP5J	ID_60271	AD	0.000411856	0.00254036	0.892688	-0.163772
CPSF6	ID_23311	ES	0.000413059	0.00254624	0.993691	-0.00913121
PAPOLA	ID_29204	AT	0.000414823	0.00254953	1.82002	0.863952
ZCCHC9	ID_72663	RI	0.000414842	0.00254953	1.53346	0.616787
ARSK	ID_72806	AT	0.000414841	0.00254953	0.85139	-0.232109
ARSK	ID_72807	AT	0.000414841	0.00254953	1.28562	0.362466
ZYX	ID_82117	ES	0.000414063	0.00254953	1.00456	0.00656834
ZFAND2A	ID_78569	AT	0.000415343	0.00255107	1.02224	0.0317364
RNASEK	ID_38815	AP	0.000416279	0.00255403	0.990738	-0.0134251
RPL30	ID_84639	ES	0.000416325	0.00255403	0.930601	-0.103766
TCHP	ID_24365	AT	0.000417849	0.00255876	0.754079	-0.407213
TCHP	ID_24366	AT	0.000417849	0.00255876	1.08157	0.113123
BCAT2	ID_50812	AT	0.000417708	0.00255876	0.993048	-0.0100646
GPSM1	ID_88155	AT	0.000418141	0.00255901	0.978551	-0.0312816
TMUB2	ID_41795	AD	0.000419623	0.00256654	1.00355	0.0051107
ALOX5	ID_11359	ES	0.000420541	0.00257062	0.968027	-0.0468802
TBC1D8B	ID_89806	AT	0.000420874	0.00257111	1.07001	0.0976292
SETMAR	ID_62992	AT	0.000422378	0.00257875	0.973869	-0.0382004
AKT1S1	ID_51110	AP	0.000423928	0.00258512	0.774591	-0.368493
SETMAR	ID_62991	AT	0.000423904	0.00258512	1.66666	0.736957
ERP29	ID_24569	ES	0.000428499	0.00260897	1.03153	0.0447902
AKT1S1	ID_51111	AD	0.000428605	0.00260897	0.902886	-0.147385
SNX13	ID_78880	AT	0.000428494	0.00260897	0.987407	-0.0182833
CIRBP	ID_46443	ES	0.000430069	0.00261631	1.4017	0.487182
ILK	ID_14171	ES	0.000431286	0.00262216	1.00311	0.00447298
CNOT4	ID_81885	AT	0.000431631	0.00262269	1.1483	0.199503
RPL36A	ID_89640	AP	0.000432003	0.00262339	0.999168	-0.00120124
ARHGAP10	ID_70799	ES	0.000433166	0.00262888	0.926532	-0.110087
RNF157	ID_43574	AT	0.00043717	0.00265003	0.958199	-0.0616025
RNF157	ID_43575	AT	0.00043717	0.00265003	4.06789	2.02428
OGFOD2	ID_25005	AP	0.000437873	0.00265115	1.36533	0.449249
OGFOD2	ID_25006	AP	0.000437873	0.00265115	0.901952	-0.148878
NEK11	ID_66782	AT	0.000439468	0.00265922	1.9752	0.981999
SLC27A1	ID_48310	AT	0.000441055	0.00266409	0.907139	-0.140604
SLC27A1	ID_48311	AT	0.000441055	0.00266409	1.51739	0.601593
GNAI2	ID_64970	AP	0.000441052	0.00266409	0.916704	-0.125472
NUMB	ID_28287	AP	0.000442646	0.00267212	1.61426	0.690873
AAMDC	ID_17980	ES	0.000447447	0.00269313	1.27104	0.346004
MARS	ID_22593	AT	0.000447439	0.00269313	1.08498	0.117664
MARS	ID_22594	AT	0.000447439	0.00269313	0.758269	-0.399218
TECPR2	ID_29415	AT	0.000447444	0.00269313	0.916914	-0.125142
TECPR2	ID_29416	AT	0.000447444	0.00269313	1.66106	0.732107
NUP133	ID_10222	AT	0.000449341	0.00270293	0.991863	-0.0117866
BLZF1	ID_8916	AT	0.00045067	0.00270774	0.948915	-0.0756491
PLEKHA5	ID_20647	AT	0.000450656	0.00270774	1.4116	0.497336
MR1	ID_9138	ES	0.000453901	0.00272405	1.21526	0.281269
ASPH	ID_83970	AT	0.000453919	0.00272405	0.769376	-0.378239
FNTA	ID_83754	AD	0.00045719	0.00274045	1.63162	0.706305
TMEM185A	ID_90317	AT	0.000457188	0.00274045	1.43518	0.521233
GSDMD	ID_85420	AP	0.000458836	0.00274871	1.27602	0.351655
RPS29	ID_27421	AT	0.000461558	0.00276339	1.00215	0.00310465
LCORL	ID_68865	AT	0.000463795	0.00277353	0.80597	-0.311202
LCORL	ID_68866	AT	0.000463795	0.00277353	1.12993	0.176235
SEC31A	ID_69735	AD	0.000465462	0.00278186	1.70284	0.767944
C12orf76	ID_24403	AT	0.000468814	0.00280026	1.46566	0.551555
UBE2J2	ID_48	ES	0.000472414	0.00282011	1.97691	0.983249
FANCI	ID_32417	ES	0.000475633	0.00283766	0.989123	-0.0157782
PER1	ID_39093	AT	0.000478945	0.00285101	0.984061	-0.0231798
CCDC58	ID_66431	ES	0.000478335	0.00285101	0.991552	-0.0122392
WTAP	ID_78310	AP	0.000478988	0.00285101	1.21391	0.279662
WTAP	ID_78311	AP	0.000478988	0.00285101	0.745261	-0.424182
MED8	ID_2170	RI	0.000482113	0.00286642	1.03609	0.0511556
SLC39A1	ID_7765	AP	0.000482419	0.00286642	1.51238	0.596817
SLC8B1	ID_24633	AP	0.000482419	0.00286642	1.89655	0.923381
RPRD1A	ID_45199	AT	0.000484131	0.00287157	2.27073	1.18316
RPRD1A	ID_45201	AT	0.000484131	0.00287157	0.965952	-0.0499769
TMEM14C	ID_75307	AA	0.000484099	0.00287157	1.65468	0.72655
NLRP1	ID_38720	AT	0.000485892	0.00288034	0.863707	-0.211386
PSMA6	ID_27219	AP	0.000487481	0.00288645	0.989528	-0.0151871
TATDN2	ID_63313	AD	0.000487489	0.00288645	0.813886	-0.297102
EXOSC3	ID_86445	AT	0.000489354	0.00289423	1.34974	0.432682
TMEM185A	ID_90319	AT	0.000489369	0.00289423	0.955483	-0.0656986
S100A13	ID_7735	ES	0.000492071	0.00290852	1.00361	0.00520171
GPR137	ID_16625	ES	0.000493076	0.00290941	0.949361	-0.0749707
RAPGEF3	ID_21351	AT	0.000492886	0.00290941	1.23614	0.305845
RAPGEF3	ID_21352	AT	0.000492886	0.00290941	0.821249	-0.284108
PABPC4	ID_1893	ES	0.000496398	0.00292732	1.04322	0.0610503
IFITM2	ID_13641	AP	0.00049996	0.0029399	1.95424	0.966607
IFITM2	ID_13642	AP	0.00049996	0.0029399	0.910659	-0.135018
ANKRD54	ID_62163	AP	0.000499937	0.0029399	1.32442	0.405361
SAR1B	ID_73415	AP	0.000499973	0.0029399	0.694636	-0.525671
URM1	ID_87742	RI	0.000499942	0.0029399	1.73947	0.798648
PDK1	ID_55976	AT	0.000502887	0.00295533	4.61213	2.20543
NEU3	ID_17810	AT	0.00050535	0.00296809	0.745099	-0.424496
GNE	ID_86340	RI	0.000506999	0.00297606	0.956808	-0.0636985
SMDT1	ID_62494	AD	0.000508896	0.00298548	1.01082	0.0155228
HP1BP3	ID_938	AP	0.000513088	0.00300835	0.51129	-0.967787
SMIM7	ID_48184	AT	0.000514418	0.00301441	0.829177	-0.270247
TINF2	ID_26934	ES	0.000514726	0.00301449	1.01226	0.0175743
PTPMT1	ID_15770	RI	0.000516247	0.00301993	1.34146	0.423801
FAM3A	ID_90622	AT	0.000516179	0.00301993	0.981498	-0.0269424
NFAT5	ID_37289	AT	0.000518085	0.00302728	0.964744	-0.0517824
GGCX	ID_54288	ES	0.000518098	0.00302728	0.926182	-0.110632
KDM2B	ID_24879	RI	0.00052159	0.00304594	0.927111	-0.109186
HHIPL1	ID_29224	AT	0.000528419	0.00308229	0.887079	-0.172866
HHIPL1	ID_29225	AT	0.000528419	0.00308229	3.34949	1.74394
TSFM	ID_22754	AT	0.000529253	0.00308539	1.04277	0.0604173
RPL29	ID_65165	AT	0.000536658	0.00312677	0.999145	-0.00123471
RPS20	ID_83888	AA	0.000536975	0.00312684	1.12024	0.163806
SLC52A2	ID_85573	AD	0.00053874	0.00313533	1.04993	0.0702916
JOSD2	ID_51205	ES	0.000540665	0.00314115	0.965224	-0.0510641
CNOT7	ID_82784	AT	0.000540657	0.00314115	0.793187	-0.334268
CNOT7	ID_82785	AT	0.000540657	0.00314115	1.0364	0.0515769
PTOV1	ID_51098	AA	0.000542588	0.00314738	1.3504	0.433389
FLNB	ID_65416	ES	0.000542662	0.00314738	1.01786	0.0255335
PCSK5	ID_86634	AT	0.000542597	0.00314738	0.782409	-0.354004
CLIC4	ID_1134	RI	0.000543425	0.00315001	1.00013	0.0001893
SEPW1	ID_50670	AA	0.000544468	0.00315426	0.988461	-0.0167438
ERO1LB	ID_10369	AT	0.000546457	0.00315861	1.16523	0.220617
ERO1LB	ID_10370	AT	0.000546456	0.00315861	0.782903	-0.353095
TUBB3	ID_38166	AP	0.000546454	0.00315861	0.642782	-0.637599
VRK3	ID_51146	AT	0.000546448	0.00315861	0.785688	-0.347972
ERAP1	ID_72865	AT	0.000548386	0.00316618	1.11447	0.156355
ERAP1	ID_72866	AT	0.000548386	0.00316618	0.544231	-0.877708
ZNF586	ID_52336	AT	0.000550344	0.00317568	0.892136	-0.164665
COL12A1	ID_76769	AT	0.000554097	0.00319553	1.01146	0.0164393
MBD4	ID_66717	AT	0.000558195	0.00321553	0.932205	-0.101281
MBD4	ID_66718	AT	0.000558195	0.00321553	1.48602	0.571452
DNAJB2	ID_57675	RI	0.000562159	0.00323654	0.740753	-0.432936
PSEN1	ID_28260	AP	0.000564144	0.00324614	0.914994	-0.128166
PYHIN1	ID_8389	AT	0.000565349	0.0032494	1.2862	0.36311
PYHIN1	ID_8390	AT	0.000565349	0.0032494	0.567151	-0.818196
NAA38	ID_39062	AD	0.000574201	0.00329842	0.847454	-0.238793
SYT15	ID_11433	AT	0.000576233	0.00330823	0.843258	-0.245954
NFKBIB	ID_49719	AA	0.000578766	0.00332091	1.02539	0.0361732
HN1	ID_43370	ES	0.000581063	0.00333221	0.999489	-0.000737526
MFSD11	ID_43689	RI	0.000586384	0.00335774	1.29441	0.372291
KMT2E	ID_81267	AT	0.000586501	0.00335774	0.970114	-0.043774
KMT2E	ID_81268	AT	0.000586501	0.00335774	1.63355	0.708012
CTTN	ID_17401	RI	0.000588358	0.00336648	1.01033	0.0148236
SMARCC2	ID_22390	RI	0.000590137	0.00337476	1.09831	0.13529
GGA1	ID_62123	AT	0.000594835	0.00339973	0.960207	-0.0585823
CKAP2	ID_26000	AT	0.00059903	0.00341987	1.65862	0.729987
CKAP2	ID_26001	AT	0.000599029	0.00341987	0.971386	-0.041884
SSH1	ID_24255	AT	0.00060328	0.0034422	0.958857	-0.0606126
HRAS	ID_13684	RI	0.000607542	0.00346458	0.720629	-0.472671
BTF3L4	ID_2993	AT	0.000613837	0.00349853	0.983406	-0.0241415
TUBB3	ID_38167	AP	0.000622695	0.00354505	1.58786	0.667087
TPM2	ID_86276	AT	0.000622613	0.00354505	0.988871	-0.0161458
ZDHHC7	ID_37872	RI	0.000623941	0.00355016	0.996267	-0.00539599
COX6B1	ID_49245	AP	0.000624417	0.00355089	0.999373	-0.000904959
SCN11A	ID_64113	AT	0.000626157	0.0035588	1.02129	0.030394
MKNK1	ID_2806	AT	0.000629274	0.00356865	0.960436	-0.0582383
MRPL42	ID_23698	AT	0.000629273	0.00356865	1.91984	0.940983
NDUFB5	ID_67705	ES	0.000629251	0.00356865	0.983693	-0.0237203
EDF1	ID_88229	RI	0.000629289	0.00356865	1.40165	0.487123
BCL7C	ID_36193	AT	0.000633286	0.00358777	1.00304	0.00437397
ASXL1	ID_58951	AT	0.000633714	0.00358777	1.72007	0.78247
ASXL1	ID_58952	AT	0.000633714	0.00358777	0.942191	-0.085908
EMC6	ID_38483	AD	0.000635934	0.00359642	0.829601	-0.269511
RBM6	ID_64936	RI	0.000635949	0.00359642	1.3632	0.446999
NUMB	ID_28285	AP	0.000640424	0.00361972	0.792648	-0.335248
SSH1	ID_24256	AT	0.000642668	0.0036304	1.69849	0.764251
MYL6	ID_22376	AT	0.000644911	0.00363502	0.976607	-0.0341504
WBP2	ID_43521	ES	0.000643986	0.00363502	1.00373	0.00536407
TBC1D16	ID_44010	AT	0.000644886	0.00363502	1.8352	0.87594
TBC1D16	ID_44011	AT	0.000644887	0.00363502	0.946694	-0.0790306
SYT15	ID_11435	AT	0.000649449	0.00365454	1.21334	0.278981
FOXP1	ID_65601	AT	0.000649435	0.00365454	0.957953	-0.061973
FOXP1	ID_65602	AT	0.000649434	0.00365454	2.02641	1.01893
TSKU	ID_17902	AP	0.000654038	0.00366419	1.54304	0.625775
TSKU	ID_17903	AP	0.000654038	0.00366419	0.766475	-0.383689
TPGS2	ID_45269	ES	0.000652654	0.00366419	1.01423	0.0203892
ZNF486	ID_48718	AT	0.000653914	0.00366419	0.933375	-0.0994718
ZNF486	ID_48719	AT	0.000653914	0.00366419	1.79822	0.846571
SEC24A	ID_73420	AT	0.000654031	0.00366419	1.39135	0.476487
SEC24A	ID_73421	AT	0.000654031	0.00366419	0.957698	-0.0623577
TIMP1	ID_88926	AT	0.000651694	0.00366419	1.00688	0.00988821
TSPAN31	ID_22723	AT	0.000656002	0.00367116	1.94889	0.96265
TSPAN31	ID_22724	AT	0.000656002	0.00367116	0.964365	-0.0523487
DNAJC16	ID_763	AT	0.000657779	0.00367909	1.92119	0.942002
PLB1	ID_53064	AT	0.000663254	0.00370565	1.75949	0.815161
PLB1	ID_53065	AT	0.000663254	0.00370565	0.85839	-0.220295
DTNBP1	ID_75415	AT	0.000665514	0.00371624	0.987061	-0.0187882
SERPING1	ID_15872	ES	0.00066607	0.00371731	1.00433	0.0062322
ARSA	ID_62894	AD	0.000669508	0.00373446	1.02763	0.0393238
MTA3	ID_53366	AT	0.000670245	0.00373448	0.583017	-0.778391
MTA3	ID_53367	AT	0.000670245	0.00373448	1.33839	0.420493
POLDIP3	ID_62521	AT	0.000671615	0.00374008	1.00845	0.0121359
RPS23	ID_72694	ES	0.000672376	0.00374227	1.00673	0.00967608
SIGIRR	ID_13652	RI	0.000674931	0.00375444	1.51287	0.597291
LRRC27	ID_13493	AT	0.000677316	0.00376566	0.762781	-0.39066
UEVLD	ID_14666	AT	0.000679672	0.00377464	1.32027	0.40083
UEVLD	ID_14667	AT	0.000679672	0.00377464	0.930525	-0.103883
TNKS	ID_82597	AT	0.000680075	0.00377482	2.66357	1.41336
COA4	ID_17737	ES	0.000682049	0.00378372	1.57563	0.65593
MAN1C1	ID_1192	AP	0.000684443	0.00379082	1.40838	0.494034
MAN1C1	ID_1193	AP	0.000684443	0.00379082	0.664322	-0.590045
NSFL1C	ID_58497	AA	0.000684403	0.00379082	1.8888	0.917472
C16orf13	ID_32917	ES	0.00068683	0.00380197	0.946159	-0.0798461
IFNLR1	ID_1093	AT	0.000687894	0.0038058	2.30893	1.20722
LMNA	ID_8184	ES	0.000690931	0.0038203	1.00412	0.00593849
SRSF7	ID_53280	RI	0.000691639	0.0038203	3.34486	1.74195
ANKRD10	ID_105827	ME	0.000691629	0.0038203	0.808302	-0.307034
NADSYN1	ID_17428	ES	0.000696488	0.0038367	2.18139	1.12524
RHOF	ID_24897	AT	0.000696488	0.0038367	1.39198	0.47714
RHOF	ID_24898	AT	0.000696488	0.0038367	0.893871	-0.161862
AKR1B1	ID_81848	AD	0.000696461	0.0038367	1.77332	0.826449
TAZ	ID_90585	RI	0.000696437	0.0038367	1.58071	0.660572
TTLL3	ID_63203	AP	0.000698271	0.00384445	0.604285	-0.7267
CDC42	ID_1006	ES	0.000703789	0.00386864	1.41139	0.497119
RECQL5	ID_43466	AT	0.000703713	0.00386864	0.988644	-0.0164764
KLHL5	ID_69042	AT	0.000703802	0.00386864	0.920867	-0.118935
HAX1	ID_7826	AA	0.000706198	0.00387972	0.988235	-0.0170742
VEGFB	ID_16601	AA	0.000708716	0.00389145	1.05122	0.0720602
DBNDD1	ID_38197	AP	0.000709947	0.00389612	2.00303	1.00219
ZNF333	ID_48020	AT	0.000711199	0.00390089	0.807966	-0.307634
NCAPH2	ID_62840	AT	0.00071366	0.00391228	0.967733	-0.0473187
CCT7	ID_53960	ES	0.000714257	0.00391345	1.00404	0.00582253
AIMP2	ID_78705	ES	0.000714992	0.00391538	0.983448	-0.024079
TYK2	ID_47509	AT	0.000716109	0.00391939	0.986104	-0.0201876
REXO2	ID_18830	AP	0.000718595	0.00392903	0.976537	-0.0342531
EXOC3	ID_71442	AD	0.00071864	0.00392903	1.51563	0.599918
SF1	ID_16681	AA	0.000721163	0.0039386	1.09271	0.127905
LSM5	ID_79188	AP	0.000721121	0.0039386	0.632595	-0.660647
ZP3	ID_80169	AP	0.000728713	0.00397771	1.32553	0.40657
NCAPH2	ID_62839	AT	0.000731244	0.00398939	1.48089	0.566466
SLC2A11	ID_61341	AT	0.000733769	0.003999	3.28682	1.71669
GGA1	ID_62124	AT	0.00073379	0.003999	1.6829	0.750953
CEP89	ID_48911	AT	0.00073569	0.00400721	0.981034	-0.0276243
DECR1	ID_84402	ES	0.000740212	0.00402969	0.995944	-0.0058628
MCAM	ID_19134	AP	0.000741483	0.00403231	1.7029	0.767992
MCAM	ID_19135	AP	0.000741483	0.00403231	0.919747	-0.120691
CDCP1	ID_64397	AT	0.000744013	0.00404176	0.958758	-0.0607613
CDCP1	ID_64398	AT	0.000744013	0.00404176	1.94343	0.958605
ACAD8	ID_19552	AT	0.000746631	0.00405167	0.966485	-0.0491814
HEATR5A	ID_27113	AT	0.000746551	0.00405167	0.933194	-0.0997513
UVRAG	ID_17881	AP	0.000747394	0.00405365	0.420976	-1.24819
MUC1	ID_7960	ES	0.000750175	0.00406657	0.984699	-0.0222453
SCIMP	ID_38666	AT	0.000751856	0.00407135	1.35027	0.433247
SCIMP	ID_38667	AT	0.000751856	0.00407135	0.765363	-0.385784
ACAD8	ID_19551	AT	0.00075444	0.00408318	1.3422	0.424602
NME4	ID_32874	AP	0.000767643	0.00415024	1.57748	0.657621
HDDC2	ID_77424	ES	0.000767644	0.00415024	1.11275	0.154132
SPOCK2	ID_12071	AT	0.000770414	0.00415861	0.964465	-0.0521997
SPOCK2	ID_12072	AT	0.000770414	0.00415861	2.70953	1.43804
TBRG1	ID_19225	ES	0.000770273	0.00415861	1.29329	0.371048
GLMP	ID_8225	AA	0.000772896	0.0041698	1.80273	0.85018
ZFAND4	ID_11367	AT	0.000775655	0.00417805	0.876212	-0.190649
ABCC4	ID_26108	AT	0.000775631	0.00417805	1.842	0.881276
ABCC4	ID_26110	AT	0.000775631	0.00417805	0.947327	-0.0780655
FAM129C	ID_48337	ES	0.000776407	0.0041799	1.03389	0.0480896
EXOSC8	ID_25655	AA	0.000780699	0.00420079	0.978311	-0.0316344
HADHA	ID_52886	AT	0.000783247	0.00421228	0.994864	-0.00742818
ING4	ID_19915	ES	0.000786326	0.00422289	0.980802	-0.0279667
SRSF6	ID_59434	ES	0.000786463	0.00422289	1.27672	0.352442
ABHD11	ID_80026	ES	0.000786001	0.00422289	1.06883	0.0960279
MICAL1	ID_77197	AP	0.00078907	0.00422856	0.597286	-0.743507
MICAL1	ID_77198	AP	0.00078907	0.00422856	1.21167	0.277001
MTHFD1L	ID_78150	AT	0.000789177	0.00422856	1.13058	0.177065
MTHFD1L	ID_78151	AT	0.000789177	0.00422856	0.714528	-0.484937
LRRN2	ID_9485	AP	0.000795057	0.00424224	0.386502	-1.37145
LRRN2	ID_9486	AP	0.000795057	0.00424224	1.09419	0.129862
RARA	ID_40859	AP	0.000794003	0.00424224	2.8928	1.53247
DPP9	ID_46820	AT	0.000794641	0.00424224	1.43854	0.524607
DPP9	ID_46822	AT	0.000794641	0.00424224	0.960035	-0.0588417
ZNF626	ID_48723	AT	0.00079465	0.00424224	0.782025	-0.354713
ZNF626	ID_48724	AT	0.00079465	0.00424224	1.41538	0.501191
SAP30L	ID_74220	ES	0.000793221	0.00424224	0.991322	-0.0125742
SOD2	ID_78308	ES	0.000797312	0.00425206	0.987613	-0.0179816
SPG11	ID_30344	AT	0.000800104	0.0042628	0.986246	-0.0199807
TUBB3	ID_38168	AP	0.000800164	0.0042628	0.672582	-0.572219
SLC10A7	ID_70771	AT	0.000802885	0.00427507	0.969283	-0.0450099
HIVEP1	ID_75356	AT	0.000805688	0.00428552	1.44048	0.52655
HIVEP1	ID_75357	AT	0.000805688	0.00428552	0.961399	-0.0567933
RNF220	ID_2557	AT	0.000814072	0.00432335	1.38951	0.474574
RNF220	ID_2558	AT	0.000814072	0.00432335	0.960922	-0.0575087
AUP1	ID_54101	AA	0.000814039	0.00432335	1.33533	0.417201
SH3BP1	ID_62136	RI	0.000825324	0.00437659	0.991741	-0.0119643
USP45	ID_77063	AT	0.000825383	0.00437659	0.795467	-0.330127
ZNF250	ID_85676	AT	0.000825381	0.00437659	0.843713	-0.245175
GCHFR	ID_30031	AP	0.000828219	0.00438253	0.604579	-0.725996
CLEC16A	ID_34003	AT	0.000828222	0.00438253	1.71764	0.780425
CLEC16A	ID_34004	AT	0.000828222	0.00438253	0.930827	-0.103415
EXOSC3	ID_86446	ES	0.000828209	0.00438253	1.07463	0.103836
ADCK3	ID_10035	AP	0.000831075	0.00439079	0.845226	-0.24259
ADCK3	ID_10036	AP	0.000831075	0.00439079	1.64121	0.714764
TXNL4A	ID_46286	ES	0.000831026	0.00439079	0.986539	-0.019552
ZNF273	ID_79842	AT	0.000836829	0.00441662	1.17732	0.235511
ZNF273	ID_79843	AT	0.000836828	0.00441662	0.825956	-0.275864
GTF2H1	ID_14601	AP	0.000842603	0.0044448	1.29681	0.374963
SUFU	ID_12962	AT	0.000845469	0.00445549	0.963753	-0.0532646
SCD5	ID_69716	AT	0.000845503	0.00445549	0.874405	-0.193627
UNC119	ID_39913	AP	0.000851321	0.0044792	1.81487	0.859867
UNC119	ID_39914	AP	0.000851321	0.0044792	0.941276	-0.0873102
ELF2	ID_70612	AT	0.000851242	0.0044792	1.01468	0.0210203
IVNS1ABP	ID_9216	AT	0.000856784	0.00450219	1.00884	0.0126998
PITPNM2	ID_25042	AT	0.000857012	0.00450219	0.938425	-0.0916867
PITPNM2	ID_25043	AT	0.000857013	0.00450219	1.7684	0.822443
GTF2H1	ID_14599	AP	0.00086016	0.00451639	0.744513	-0.425631
HEATR5A	ID_27111	AT	0.000862995	0.00452492	1.83809	0.878207
TBC1D22A	ID_62719	AP	0.000863114	0.00452492	0.869594	-0.201586
SUN1	ID_78520	AT	0.000862273	0.00452492	1.00424	0.00609781
RNASEH2C	ID_16916	RI	0.000866006	0.00453077	1.33244	0.41407
SREBF1	ID_39504	AT	0.000865238	0.00453077	0.99125	-0.0126786
TBC1D5	ID_63658	AP	0.000865913	0.00453077	1.45797	0.543963
DAB2IP	ID_87446	RI	0.000865973	0.00453077	0.937929	-0.0924493
APP	ID_60282	ES	0.000871873	0.00455912	1.00952	0.0136684
DHRS1	ID_26955	AA	0.000873737	0.00456653	0.986905	-0.0190173
OSGEP	ID_26443	RI	0.000878024	0.00458424	1.61915	0.695234
TBC1D5	ID_63655	AP	0.000877875	0.00458424	0.890472	-0.167358
TUBGCP2	ID_13530	AP	0.00088104	0.00459305	1.68513	0.752863
SEC23A	ID_27345	AP	0.000881063	0.00459305	1.49095	0.576229
SEC23A	ID_27346	AP	0.000881063	0.00459305	0.712992	-0.488043
ACY1	ID_65153	ES	0.000887934	0.00462651	0.995283	-0.00682059
ETFB	ID_51319	AP	0.000890167	0.00463341	0.898261	-0.154794
ETFB	ID_51320	AP	0.000890167	0.00463341	1.47018	0.555993
PKIG	ID_59476	AT	0.00089168	0.00463892	0.994597	-0.00781537
COMT	ID_61102	AA	0.000893179	0.00464435	1.9864	0.990159
SSX2IP	ID_3612	AT	0.000893733	0.00464486	1.01152	0.0165221
PCDH1	ID_73831	AT	0.000899355	0.00466695	0.646026	-0.630336
PCDH1	ID_73832	AT	0.000899355	0.00466695	1.14692	0.19776
WBSCR16	ID_80099	AT	0.000899281	0.00466695	1.01205	0.0172766
COX19	ID_78556	AT	0.000905537	0.00469425	0.82156	-0.283563
COX19	ID_78557	AT	0.000905537	0.00469425	1.2039	0.267716
H2AFY	ID_96931	ME	0.000911742	0.00472402	1.2717	0.346756
RPL22	ID_379	AP	0.000914275	0.00473474	0.998597	-0.00202608
MRPL33	ID_53046	ES	0.000914869	0.00473541	1.12132	0.165197
PQLC1	ID_46252	AT	0.00091567	0.00473715	1.0024	0.00346017
MPP5	ID_28044	AT	0.000917745	0.00474548	1.01619	0.0231762
DBNDD1	ID_38196	AP	0.00092401	0.00477545	0.906588	-0.141481
RPS15	ID_46491	RI	0.000927463	0.00479087	1.48501	0.57047
ZNF738	ID_48761	AT	0.000940214	0.00485428	1.15062	0.202408
SMAGP	ID_21831	AT	0.000943371	0.00486812	0.52235	-0.936912
SMAGP	ID_21832	AT	0.000946594	0.00488007	1.0529	0.0743671
ENY2	ID_84894	AD	0.000946644	0.00488007	0.913264	-0.130897
ERCC4	ID_34064	AT	0.000949873	0.00489177	0.867483	-0.205093
ERCC4	ID_34065	AT	0.000949873	0.00489177	1.30825	0.387643
ARL4C	ID_58078	RI	0.000951977	0.00490014	0.967401	-0.0478137
RRNAD1	ID_8311	ES	0.000953108	0.00490348	1.06955	0.0970086
MTA1	ID_29645	ES	0.000958355	0.00492551	0.991692	-0.0120363
PDHA1	ID_88633	ES	0.000958157	0.00492551	0.975961	-0.0351045
SVIL	ID_11111	AT	0.000959496	0.00492889	0.991457	-0.0123775
DAZAP2	ID_21811	AT	0.000962868	0.00494372	0.978966	-0.0306693
DHX8	ID_41705	AT	0.000966196	0.00495582	1.14953	0.201042
DHX8	ID_41706	AT	0.000966196	0.00495582	0.882686	-0.180028
CD81	ID_13916	AP	0.00097603	0.00500152	0.978321	-0.0316197
STAG1	ID_66930	AT	0.000976086	0.00500152	1.87133	0.904063
LTB4R	ID_26963	AP	0.000979444	0.00501369	0.770947	-0.375296
LTB4R	ID_26964	AP	0.000979443	0.00501369	1.26915	0.343857
ZNF606	ID_52380	AT	0.000982782	0.00502573	0.8081	-0.307394
NCBP2	ID_68270	AD	0.000982763	0.00502573	0.751348	-0.412447
FBXL20	ID_40641	AT	0.000989481	0.00505493	1.09087	0.125484
FBXL20	ID_40642	AT	0.000989481	0.00505493	0.794666	-0.33158
ARL6IP4	ID_25025	ES	0.000998706	0.0050995	0.997647	-0.00339811
MROH1	ID_85544	RI	0.000999465	0.00510082	1.7604	0.8159
[truncated: 8,332 more rows]
