# Supplementary material for: Genome-Wide Analyses of Prognostic and Therapeutic Alternative Splicing Signatures in Bladder Urothelial Carcinoma
Source: Front Oncol. 2021 Mar 26;11:626858. doi: 10.3389/fonc.2021.626858 (PMC8033158; doi:10.3389/fonc.2021.626858)
Supplement: Supplementary file 8 [file Table_6.xlsx]

## Sheet: Sheet1
ONTOLOGY	ID	Description	GeneRatio	BgRatio	pvalue	p.adjust	qvalue	geneID	Count
BP	GO:0006612	protein targeting to membrane	13/171	198/18493	4.01186e-08	4.01186e-08	3.72986e-05	RPL17/RPL6/UBA52/RPL28/RPL32/RPL14/RPL34/RPL7/RPS27A/MIEF2/ANK3/FIS1/ZFAND2B	13
BP	GO:0090150	establishment of protein localization to membrane	16/171	317/18493	4.30498e-08	4.30498e-08	3.72986e-05	RPL17/RPL6/UBA52/RPL28/RPL32/RPL14/RPL34/RPL7/RPS27A/VAMP2/ARFRP1/MIEF2/ANK3/FIS1/ZFAND2B/RILPL1	16
BP	GO:0006614	SRP-dependent cotranslational protein targeting to membrane	10/171	105/18493	4.75218e-08	4.75218e-08	3.72986e-05	RPL17/RPL6/UBA52/RPL28/RPL32/RPL14/RPL34/RPL7/RPS27A/ZFAND2B	10
BP	GO:0007031	peroxisome organization	9/171	81/18493	5.90047e-08	5.90047e-08	3.72986e-05	UBA52/UBE2D3/CROT/CRAT/RPS27A/ACAA1/ACOT2/FIS1/ABCD1	9
BP	GO:0006613	cotranslational protein targeting to membrane	10/171	109/18493	6.80371e-08	6.80371e-08	3.72986e-05	RPL17/RPL6/UBA52/RPL28/RPL32/RPL14/RPL34/RPL7/RPS27A/ZFAND2B	10
BP	GO:0006605	protein targeting	18/171	424/18493	8.31339e-08	8.31339e-08	3.79791e-05	RPL17/RPL6/UBA52/RPL28/RPL32/RPL14/RPL34/RPL7/UBE2D3/CROT/CRAT/RPS27A/ACAA1/MIEF2/ANK3/ACOT2/FIS1/ZFAND2B	18
BP	GO:0070972	protein localization to endoplasmic reticulum	11/171	146/18493	1.13961e-07	1.13961e-07	4.46245e-05	RPL17/RPL6/UBA52/RPL28/RPL32/RPL14/RPL34/RPL7/RPS27A/ZFAND2B/SEC16A	11
BP	GO:0045047	protein targeting to ER	10/171	117/18493	1.33589e-07	1.33589e-07	4.5772e-05	RPL17/RPL6/UBA52/RPL28/RPL32/RPL14/RPL34/RPL7/RPS27A/ZFAND2B	10
BP	GO:0072599	establishment of protein localization to endoplasmic reticulum	10/171	121/18493	1.83579e-07	1.83579e-07	5.59112e-05	RPL17/RPL6/UBA52/RPL28/RPL32/RPL14/RPL34/RPL7/RPS27A/ZFAND2B	10
BP	GO:0043574	peroxisomal transport	8/171	69/18493	2.34714e-07	2.34714e-07	6.43365e-05	UBA52/UBE2D3/CROT/CRAT/RPS27A/ACAA1/ACOT2/ABCD1	8
BP	GO:0000184	nuclear-transcribed mRNA catabolic process, nonsense-mediated decay	9/171	120/18493	1.73836e-06	1.73836e-06	0.000433176	RPL17/RPL6/UBA52/RPL28/RPL32/RPL14/RPL34/RPL7/RPS27A	9
BP	GO:0006625	protein targeting to peroxisome	7/171	68/18493	3.08292e-06	3.08292e-06	0.000603603	UBA52/UBE2D3/CROT/CRAT/RPS27A/ACAA1/ACOT2	7
BP	GO:0072662	protein localization to peroxisome	7/171	68/18493	3.08292e-06	3.08292e-06	0.000603603	UBA52/UBE2D3/CROT/CRAT/RPS27A/ACAA1/ACOT2	7
BP	GO:0072663	establishment of protein localization to peroxisome	7/171	68/18493	3.08292e-06	3.08292e-06	0.000603603	UBA52/UBE2D3/CROT/CRAT/RPS27A/ACAA1/ACOT2	7
BP	GO:0033540	fatty acid beta-oxidation using acyl-CoA oxidase	4/171	15/18493	8.89785e-06	8.89785e-06	0.00162596	CROT/CRAT/ACAA1/ABCD1	4
BP	GO:0006413	translational initiation	10/171	194/18493	1.33757e-05	1.33757e-05	0.00229147	RPL17/RPL6/UBA52/RPL28/RPL32/RPL14/RPL34/RPL7/RPS27A/ATF4	10
BP	GO:0000956	nuclear-transcribed mRNA catabolic process	10/171	207/18493	2.34355e-05	2.34355e-05	0.00371948	RPL17/RPL6/UBA52/RPL28/RPL32/RPL14/RPL34/RPL7/RPS27A/CNOT4	10
BP	GO:0016197	endosomal transport	10/171	208/18493	2.44251e-05	2.44251e-05	0.00371948	UBA52/VPS28/STX10/RPS27A/SNX5/MVB12B/ARFRP1/BLOC1S1/RIC1/DENND1A	10
BP	GO:0006402	mRNA catabolic process	12/171	307/18493	2.96263e-05	2.96263e-05	0.00427407	RPL17/RPL6/UBA52/RPL28/RPL32/RPL14/RPL34/RPL7/PRKCA/RPS27A/MAPKAPK2/CNOT4	12
BP	GO:0006401	RNA catabolic process	12/171	340/18493	7.92581e-05	7.92581e-05	0.0108625	RPL17/RPL6/UBA52/RPL28/RPL32/RPL14/RPL34/RPL7/PRKCA/RPS27A/MAPKAPK2/CNOT4	12
BP	GO:0070555	response to interleukin-1	8/171	152/18493	8.59367e-05	8.59367e-05	0.011217	UBA52/PRKCA/RELA/RPS27A/TAF9/HDAC4/PLCB1/CX3CL1	8
BP	GO:0048285	organelle fission	14/171	458/18493	9.43996e-05	9.43996e-05	0.0117616	CHEK1/KIF4A/TNKS/NEK2/FANCD2/OBSL1/MIEF2/RAD54B/CCDC36/NSFL1C/PLCB1/TUBGCP3/FIS1/DCN	14
BP	GO:0009612	response to mechanical stimulus	9/171	204/18493	0.000121012	0.000121012	0.0144218	CHEK1/STAT1/FOS/RELA/CXCL12/XPA/HDAC4/FOSB/DCN	9
BP	GO:0007249	I-kappaB kinase/NF-kappaB signaling	10/171	258/18493	0.000148102	0.000148102	0.0169148	UBA52/STAT1/IRF3/RELA/RPS27A/EEF1D/TNIP1/CX3CL1/CFLAR/S100A4	10
BP	GO:0007100	mitotic centrosome separation	3/171	13/18493	0.000207542	0.000207542	0.0227553	CHEK1/NEK2/NSFL1C	3
BP	GO:0051299	centrosome separation	3/171	14/18493	0.000262352	0.000262352	0.0276585	CHEK1/NEK2/NSFL1C	3
BP	GO:0090141	positive regulation of mitochondrial fission	3/171	15/18493	0.000325715	0.000325715	0.0330668	MIEF2/FIS1/DCN	3
BP	GO:0042089	cytokine biosynthetic process	6/171	105/18493	0.000432736	0.000432736	0.0423626	IRF3/RELA/PTPRC/MAPKAPK2/TIA1/PCSK5	6
BP	GO:0042107	cytokine metabolic process	6/171	106/18493	0.000455236	0.000455236	0.0430284	IRF3/RELA/PTPRC/MAPKAPK2/TIA1/PCSK5	6
BP	GO:0090316	positive regulation of intracellular protein transport	7/171	158/18493	0.00067656	0.00067656	0.0618162	UBE2D3/VAMP2/MIEF2/ANK3/FIS1/SEC16A/PSEN1	7
BP	GO:0006979	response to oxidative stress	12/171	441/18493	0.000843103	0.000843103	0.0725744	STAT1/FOS/TPM1/RELA/XPA/FANCD2/ATF4/PDK1/MAPKAP1/CFLAR/ABCD1/PSEN1	12
BP	GO:0009314	response to radiation	12/171	443/18493	0.000876742	0.000876742	0.0725744	CHEK1/FOS/RELA/CXCL12/PTPRC/XPA/FANCD2/EEF1D/ATF4/DNMT3A/CAMKMT/INTS3	12
BP	GO:0032496	response to lipopolysaccharide	10/171	324/18493	0.00089066	0.00089066	0.0725744	FOS/IRF3/PRKCA/RELA/MAPKAPK2/RARA/IFNAR1/CX3CL1/DCN/CD96	10
BP	GO:0036293	response to decreased oxygen levels	10/171	325/18493	0.000911734	0.000911734	0.0725744	UBA52/CXCL12/RPS27A/ATF4/PDK1/DNMT3A/APOLD1/PKM/FIS1/CFLAR	10
BP	GO:0043620	regulation of DNA-templated transcription in response to stress	5/171	81/18493	0.00092669	0.00092669	0.0725744	UBA52/CHEK1/RELA/RPS27A/ATF4	5
BP	GO:0061951	establishment of protein localization to plasma membrane	4/171	50/18493	0.00116691	0.00116691	0.0840491	VAMP2/ARFRP1/ANK3/RILPL1	4
BP	GO:0002237	response to molecule of bacterial origin	10/171	337/18493	0.0011982	0.0011982	0.0840491	FOS/IRF3/PRKCA/RELA/MAPKAPK2/RARA/IFNAR1/CX3CL1/DCN/CD96	10
BP	GO:0000715	nucleotide-excision repair, DNA damage recognition	3/171	23/18493	0.00120072	0.00120072	0.0840491	UBA52/XPA/RPS27A	3
BP	GO:0090140	regulation of mitochondrial fission	3/171	23/18493	0.00120072	0.00120072	0.0840491	MIEF2/FIS1/DCN	3
BP	GO:0043122	regulation of I-kappaB kinase/NF-kappaB signaling	8/171	226/18493	0.00122832	0.00122832	0.0840491	STAT1/IRF3/RELA/EEF1D/TNIP1/CX3CL1/CFLAR/S100A4	8
BP	GO:0036297	interstrand cross-link repair	4/171	51/18493	0.00125719	0.00125719	0.0840491	UBA52/XPA/RPS27A/FANCD2	4
BP	GO:0010256	endomembrane system organization	11/171	403/18493	0.00134881	0.00134881	0.086884	VPS28/PRKCA/PTPRC/OBSL1/BLOC1S1/NSFL1C/ANK3/PDE4DIP/SEC16A/ANKLE2/ABCD1	11
BP	GO:0035666	TRIF-dependent toll-like receptor signaling pathway	3/171	24/18493	0.00136298	0.00136298	0.086884	UBA52/IRF3/RPS27A	3
BP	GO:0034599	cellular response to oxidative stress	9/171	289/18493	0.00150736	0.00150736	0.0939034	FOS/TPM1/RELA/FANCD2/ATF4/PDK1/MAPKAP1/CFLAR/ABCD1	9
BP	GO:0070482	response to oxygen levels	10/171	349/18493	0.00155438	0.00155438	0.0946807	UBA52/CXCL12/RPS27A/ATF4/PDK1/DNMT3A/APOLD1/PKM/FIS1/CFLAR	10
BP	GO:0070498	interleukin-1-mediated signaling pathway	4/171	55/18493	0.00166735	0.00166735	0.0967391	UBA52/RELA/RPS27A/PLCB1	4
BP	GO:0070911	global genome nucleotide-excision repair	3/171	26/18493	0.0017273	0.0017273	0.0967391	UBA52/XPA/RPS27A	3
BP	GO:0000280	nuclear division	11/171	416/18493	0.00173356	0.00173356	0.0967391	CHEK1/KIF4A/TNKS/NEK2/FANCD2/OBSL1/RAD54B/CCDC36/NSFL1C/PLCB1/TUBGCP3	11
BP	GO:0033865	nucleoside bisphosphate metabolic process	6/171	138/18493	0.00179993	0.00179993	0.0967391	CROT/SCD5/PDK1/ACOT2/ACSM3/ABCD1	6
BP	GO:0033875	ribonucleoside bisphosphate metabolic process	6/171	138/18493	0.00179993	0.00179993	0.0967391	CROT/SCD5/PDK1/ACOT2/ACSM3/ABCD1	6
BP	GO:0034032	purine nucleoside bisphosphate metabolic process	6/171	138/18493	0.00179993	0.00179993	0.0967391	CROT/SCD5/PDK1/ACOT2/ACSM3/ABCD1	6
BP	GO:0002756	MyD88-independent toll-like receptor signaling pathway	3/171	27/18493	0.0019301	0.0019301	0.101741	UBA52/IRF3/RPS27A	3
BP	GO:0002753	cytoplasmic pattern recognition receptor signaling pathway	4/171	60/18493	0.00230026	0.00230026	0.118965	UBA52/IRF3/RELA/RPS27A	4
BP	GO:0006294	nucleotide-excision repair, preincision complex assembly	3/171	29/18493	0.00237873	0.00237873	0.120745	UBA52/XPA/RPS27A	3
BP	GO:0000038	very long-chain fatty acid metabolic process	3/171	30/18493	0.00262522	0.00262522	0.12341	ACAA1/ACOT2/ABCD1	3
BP	GO:0090314	positive regulation of protein targeting to membrane	3/171	30/18493	0.00262522	0.00262522	0.12341	MIEF2/ANK3/FIS1	3
BP	GO:0001666	response to hypoxia	9/171	314/18493	0.00264349	0.00264349	0.12341	UBA52/CXCL12/RPS27A/PDK1/DNMT3A/APOLD1/PKM/FIS1/CFLAR	9
BP	GO:0006637	acyl-CoA metabolic process	5/171	103/18493	0.00269116	0.00269116	0.12341	SCD5/PDK1/ACOT2/ACSM3/ABCD1	5
BP	GO:0035383	thioester metabolic process	5/171	103/18493	0.00269116	0.00269116	0.12341	SCD5/PDK1/ACOT2/ACSM3/ABCD1	5
BP	GO:0051783	regulation of nuclear division	7/171	201/18493	0.00270136	0.00270136	0.12341	CHEK1/TNKS/NEK2/OBSL1/CCDC36/NSFL1C/PLCB1	7
BP	GO:1903829	positive regulation of cellular protein localization	9/171	318/18493	0.00287577	0.00287577	0.129223	VPS28/UBE2D3/VAMP2/MIEF2/ANK3/FIS1/SEC16A/EPHA3/PSEN1	9
BP	GO:1903311	regulation of mRNA metabolic process	8/171	264/18493	0.00323197	0.00323197	0.142887	UBA52/PRKCA/SRSF2/RPS27A/MAPKAPK2/TIA1/RBM3/SRSF7	8
BP	GO:0006289	nucleotide-excision repair	5/171	109/18493	0.00343619	0.00343619	0.14731	UBA52/XPA/RPS27A/PPIE/POLL	5
BP	GO:0035924	cellular response to vascular endothelial growth factor stimulus	4/171	67/18493	0.00343949	0.00343949	0.14731	RELA/MAPKAPK2/NR4A1/DCN	4
BP	GO:1990535	neuron projection maintenance	2/171	10/18493	0.00364323	0.00364323	0.153635	ABCD1/PSEN1	2
BP	GO:0043001	Golgi to plasma membrane protein transport	3/171	34/18493	0.00376615	0.00376615	0.156182	VAMP2/ARFRP1/ANK3	3
BP	GO:0032388	positive regulation of intracellular transport	7/171	214/18493	0.00381758	0.00381758	0.156182	UBE2D3/VAMP2/MIEF2/ANK3/FIS1/SEC16A/PSEN1	7
BP	GO:0000266	mitochondrial fission	3/171	35/18493	0.00409153	0.00409153	0.158592	MIEF2/FIS1/DCN	3
BP	GO:0070423	nucleotide-binding oligomerization domain containing signaling pathway	3/171	35/18493	0.00409153	0.00409153	0.158592	UBA52/RELA/RPS27A	3
BP	GO:0051222	positive regulation of protein transport	10/171	402/18493	0.00429055	0.00429055	0.158592	VPS28/UBE2D3/IRF3/VAMP2/MIEF2/PHPT1/ANK3/FIS1/SEC16A/PSEN1	10
BP	GO:0009629	response to gravity	2/171	11/18493	0.00442586	0.00442586	0.158592	FOS/PKM	2
BP	GO:0014870	response to muscle inactivity	2/171	11/18493	0.00442586	0.00442586	0.158592	HDAC4/PKM	2
BP	GO:1904181	positive regulation of membrane depolarization	2/171	11/18493	0.00442586	0.00442586	0.158592	ANK3/DCN	2
BP	GO:0002755	MyD88-dependent toll-like receptor signaling pathway	3/171	36/18493	0.00443348	0.00443348	0.158592	UBA52/RPS27A/TNIP1	3
BP	GO:0035872	nucleotide-binding domain, leucine rich repeat containing receptor signaling pathway	3/171	36/18493	0.00443348	0.00443348	0.158592	UBA52/RELA/RPS27A	3
BP	GO:0090313	regulation of protein targeting to membrane	3/171	36/18493	0.00443348	0.00443348	0.158592	MIEF2/ANK3/FIS1	3
BP	GO:0006635	fatty acid beta-oxidation	4/171	72/18493	0.00445508	0.00445508	0.158592	CROT/CRAT/ACAA1/ABCD1	4
BP	GO:0006283	transcription-coupled nucleotide-excision repair	4/171	73/18493	0.00467992	0.00467992	0.160193	UBA52/XPA/RPS27A/PPIE	4
BP	GO:0042273	ribosomal large subunit biogenesis	4/171	73/18493	0.00467992	0.00467992	0.160193	RPL6/RPL14/RPL7/LAS1L	4
BP	GO:0006296	nucleotide-excision repair, DNA incision, 5'-to lesion	3/171	37/18493	0.00479226	0.00479226	0.160193	UBA52/XPA/RPS27A	3
BP	GO:0019068	virion assembly	3/171	37/18493	0.00479226	0.00479226	0.160193	UBA52/VPS28/RPS27A	3
BP	GO:1902893	regulation of pri-miRNA transcription by RNA polymerase II	3/171	37/18493	0.00479226	0.00479226	0.160193	FOS/RELA/HDAC4	3
BP	GO:0036294	cellular response to decreased oxygen levels	6/171	170/18493	0.00504867	0.00504867	0.166659	UBA52/RPS27A/ATF4/PDK1/DNMT3A/CFLAR	6
BP	GO:0043618	regulation of transcription from RNA polymerase II promoter in response to stress	4/171	75/18493	0.00515226	0.00515226	0.166659	UBA52/CHEK1/RPS27A/ATF4	4
BP	GO:0032570	response to progesterone	3/171	38/18493	0.00516808	0.00516808	0.166659	FOS/RELA/FOSB	3
BP	GO:0097284	hepatocyte apoptotic process	2/171	12/18493	0.00527889	0.00527889	0.168252	DNMT3A/CFLAR	2
BP	GO:0033683	nucleotide-excision repair, DNA incision	3/171	39/18493	0.00556118	0.00556118	0.175212	UBA52/XPA/RPS27A	3
BP	GO:0033157	regulation of intracellular protein transport	7/171	232/18493	0.00590299	0.00590299	0.182765	UBE2D3/VAMP2/MIEF2/ANK3/FIS1/SEC16A/PSEN1	7
BP	GO:0061900	glial cell activation	3/171	40/18493	0.00597174	0.00597174	0.182765	PTPRC/CX3CL1/PSEN1	3
BP	GO:0009437	carnitine metabolic process	2/171	13/18493	0.00620095	0.00620095	0.182765	CROT/CRAT	2
BP	GO:0036109	alpha-linolenic acid metabolic process	2/171	13/18493	0.00620095	0.00620095	0.182765	ACAA1/ABCD1	2
BP	GO:0072109	glomerular mesangium development	2/171	13/18493	0.00620095	0.00620095	0.182765	ACTA2/CFLAR	2
BP	GO:1902894	negative regulation of pri-miRNA transcription by RNA polymerase II	2/171	13/18493	0.00620095	0.00620095	0.182765	RELA/HDAC4	2
BP	GO:1901214	regulation of neuron death	8/171	296/18493	0.00638053	0.00638053	0.186057	FOS/ITSN1/ATF4/HDAC4/CX3CL1/FIS1/RILPL1/PSEN1	8
BP	GO:0002221	pattern recognition receptor signaling pathway	6/171	179/18493	0.00646025	0.00646025	0.186399	UBA52/IRF3/RELA/RPS27A/MAPKAPK2/TNIP1	6
BP	GO:1901216	positive regulation of neuron death	4/171	81/18493	0.00675829	0.00675829	0.188532	FOS/ATF4/HDAC4/FIS1	4
BP	GO:1903533	regulation of protein targeting	4/171	81/18493	0.00675829	0.00675829	0.188532	UBE2D3/MIEF2/ANK3/FIS1	4
BP	GO:0060359	response to ammonium ion	5/171	128/18493	0.00676759	0.00676759	0.188532	RELA/ATF4/DNMT3A/PLCB1/FOSB	5
BP	GO:0043123	positive regulation of I-kappaB kinase/NF-kappaB signaling	6/171	181/18493	0.00680931	0.00680931	0.188532	IRF3/RELA/EEF1D/CX3CL1/CFLAR/S100A4	6
BP	GO:1902850	microtubule cytoskeleton organization involved in mitosis	5/171	129/18493	0.00698904	0.00698904	0.190174	KIF4A/TNKS/NEK2/NSFL1C/TUBGCP3	5
BP	GO:0018209	peptidyl-serine modification	8/171	301/18493	0.00703127	0.00703127	0.190174	PRKCA/TNKS/MAPKAPK2/CLSPN/MAPKAP1/DCN/STK32C/MARK3	8
BP	GO:0014854	response to inactivity	2/171	14/18493	0.00719071	0.00719071	0.190174	HDAC4/PKM	2
BP	GO:0043031	negative regulation of macrophage activation	2/171	14/18493	0.00719071	0.00719071	0.190174	PTPRC/CX3CL1	2
BP	GO:0071347	cellular response to interleukin-1	5/171	130/18493	0.00721552	0.00721552	0.190174	UBA52/RELA/RPS27A/PLCB1/CX3CL1	5
BP	GO:1903321	negative regulation of protein modification by small protein conjugation or removal	4/171	83/18493	0.00735944	0.00735944	0.19212	VPS28/RELA/USP4/PSEN1	4
BP	GO:0002224	toll-like receptor signaling pathway	5/171	131/18493	0.00744708	0.00744708	0.192574	UBA52/IRF3/RPS27A/MAPKAPK2/TNIP1	5
BP	GO:1904951	positive regulation of establishment of protein localization	10/171	437/18493	0.00758783	0.00758783	0.19438	VPS28/UBE2D3/IRF3/VAMP2/MIEF2/PHPT1/ANK3/FIS1/SEC16A/PSEN1	10
BP	GO:0042147	retrograde transport, endosome to Golgi	4/171	84/18493	0.00767281	0.00767281	0.194737	STX10/SNX5/ARFRP1/RIC1	4
BP	GO:0061614	pri-miRNA transcription by RNA polymerase II	3/171	44/18493	0.00779259	0.00779259	0.195962	FOS/RELA/HDAC4	3
BP	GO:0071453	cellular response to oxygen levels	6/171	187/18493	0.00793861	0.00793861	0.197819	UBA52/RPS27A/ATF4/PDK1/DNMT3A/CFLAR	6
CC	GO:0022625	cytosolic large ribosomal subunit	8/177	63/19659	9.35878e-08	9.35878e-08	2.26659e-05	RPL17/RPL6/UBA52/RPL28/RPL32/RPL14/RPL34/RPL7	8
CC	GO:0015934	large ribosomal subunit	10/177	121/19659	1.45001e-07	1.45001e-07	2.26659e-05	RPL17/RPL6/UBA52/RPL28/RPL32/RPL14/RPL34/RPL7/MRPL2/RBM3	10
CC	GO:0044445	cytosolic part	13/177	250/19659	4.49607e-07	4.49607e-07	4.68538e-05	RPL17/RPL6/UBA52/RPL28/RPL32/RPL14/RPL34/RPL7/PSMC5/RPS27A/BLOC1S1/HPS1/CFLAR	13
CC	GO:0022626	cytosolic ribosome	9/177	115/19659	9.83753e-07	9.83753e-07	7.6888e-05	RPL17/RPL6/UBA52/RPL28/RPL32/RPL14/RPL34/RPL7/RPS27A	9
CC	GO:0044391	ribosomal subunit	11/177	191/19659	1.31131e-06	1.31131e-06	8.19914e-05	RPL17/RPL6/UBA52/RPL28/RPL32/RPL14/RPL34/RPL7/RPS27A/MRPL2/RBM3	11
CC	GO:0005840	ribosome	11/177	276/19659	4.26675e-05	4.26675e-05	0.0022232	RPL17/RPL6/UBA52/RPL28/RPL32/RPL14/RPL34/RPL7/RPS27A/MRPL2/RBM3	11
CC	GO:0044438	microbody part	6/177	101/19659	0.000305774	0.000305774	0.0119493	CROT/CRAT/ACAA1/ACOT2/FIS1/ABCD1	6
CC	GO:0044439	peroxisomal part	6/177	101/19659	0.000305774	0.000305774	0.0119493	CROT/CRAT/ACAA1/ACOT2/FIS1/ABCD1	6
CC	GO:0043292	contractile fiber	8/177	229/19659	0.00113283	0.00113283	0.030314	ACTA2/TPM1/OBSL1/HDAC4/PPP1R12B/TPM4/ANK3/PDE4DIP	8
CC	GO:0005782	peroxisomal matrix	4/177	52/19659	0.00122769	0.00122769	0.030314	CROT/CRAT/ACAA1/ACOT2	4
CC	GO:0031907	microbody lumen	4/177	52/19659	0.00122769	0.00122769	0.030314	CROT/CRAT/ACAA1/ACOT2	4
CC	GO:0032588	trans-Golgi network membrane	5/177	90/19659	0.00132523	0.00132523	0.030314	AP1S2/STX10/AP1B1/ARFRP1/RIC1	5
CC	GO:0005777	peroxisome	6/177	134/19659	0.0013575	0.0013575	0.030314	CROT/CRAT/ACAA1/ACOT2/FIS1/ABCD1	6
CC	GO:0042579	microbody	6/177	134/19659	0.0013575	0.0013575	0.030314	CROT/CRAT/ACAA1/ACOT2/FIS1/ABCD1	6
CC	GO:0005865	striated muscle thin filament	3/177	31/19659	0.00267968	0.00267968	0.0558503	TPM1/OBSL1/TPM4	3
CC	GO:0036379	myofilament	3/177	32/19659	0.00293749	0.00293749	0.057397	TPM1/OBSL1/TPM4	3
CC	GO:0044449	contractile fiber part	7/177	214/19659	0.00331022	0.00331022	0.0600797	ACTA2/TPM1/OBSL1/HDAC4/PPP1R12B/TPM4/ANK3	7
CC	GO:0000813	ESCRT I complex	2/177	10/19659	0.00345913	0.00345913	0.0600797	VPS28/MVB12B	2
CC	GO:0030016	myofibril	7/177	218/19659	0.00366457	0.00366457	0.0602979	TPM1/OBSL1/HDAC4/PPP1R12B/TPM4/ANK3/PDE4DIP	7
CC	GO:0042641	actomyosin	4/177	71/19659	0.00386054	0.00386054	0.0603463	TPM1/HDAC4/PDLIM7/TPM4	4
CC	GO:0031594	neuromuscular junction	4/177	76/19659	0.00492387	0.00492387	0.0733027	TUBA1A/HDAC4/ANK3/PSEN1	4
CC	GO:0031672	A band	3/177	40/19659	0.00555165	0.00555165	0.0788919	OBSL1/HDAC4/PPP1R12B	3
CC	GO:0031201	SNARE complex	3/177	47/19659	0.00870307	0.00870307	0.107755	STX7/STX10/VAMP2	3
CC	GO:0005779	integral component of peroxisomal membrane	2/177	16/19659	0.00890309	0.00890309	0.107755	FIS1/ABCD1	2
CC	GO:0031231	intrinsic component of peroxisomal membrane	2/177	16/19659	0.00890309	0.00890309	0.107755	FIS1/ABCD1	2
CC	GO:0030017	sarcomere	6/177	197/19659	0.00896146	0.00896146	0.107755	TPM1/OBSL1/HDAC4/PPP1R12B/TPM4/ANK3	6
CC	GO:1904115	axon cytoplasm	3/177	53/19659	0.0120903	0.0120903	0.139993	KIF4A/BLOC1S1/TMEM108	3
CC	GO:0005765	lysosomal membrane	8/177	344/19659	0.0128999	0.0128999	0.141308	UBA52/AP1S2/STX7/AP1B1/BLOC1S1/CYB561A3/ABCD1/PSEN1	8
CC	GO:0098852	lytic vacuole membrane	8/177	345/19659	0.0131078	0.0131078	0.141308	UBA52/AP1S2/STX7/AP1B1/BLOC1S1/CYB561A3/ABCD1/PSEN1	8
CC	GO:0031082	BLOC complex	2/177	20/19659	0.0137685	0.0137685	0.143482	BLOC1S1/HPS1	2
CC	GO:0000242	pericentriolar material	2/177	21/19659	0.0151287	0.0151287	0.14636	TNKS/BBS9	2
CC	GO:0090575	RNA polymerase II transcription factor complex	5/177	161/19659	0.015364	0.015364	0.14636	FOS/TAF9/ATF4/WWOX/RARA	5
CC	GO:0001725	stress fiber	3/177	59/19659	0.0161352	0.0161352	0.14636	TPM1/PDLIM7/TPM4	3
CC	GO:0097517	contractile actin filament bundle	3/177	59/19659	0.0161352	0.0161352	0.14636	TPM1/PDLIM7/TPM4	3
CC	GO:0005802	trans-Golgi network	6/177	225/19659	0.0163854	0.0163854	0.14636	AP1S2/STX10/AP1B1/VAMP2/ARFRP1/RIC1	6
CC	GO:0030667	secretory granule membrane	7/177	295/19659	0.0176643	0.0176643	0.153401	PTPRC/EXOC3/UBR4/VAMP2/SERPINB6/PSEN1/ABCA3	7
CC	GO:0032432	actin filament bundle	3/177	67/19659	0.0225734	0.0225734	0.190734	TPM1/PDLIM7/TPM4	3
CC	GO:0010008	endosome membrane	9/177	462/19659	0.0243593	0.0243593	0.191599	UBA52/VPS28/UBE2D3/STX7/RPS27A/SNX5/MVB12B/TMEM108/CYB561A3	9
CC	GO:0036452	ESCRT complex	2/177	27/19659	0.0244128	0.0244128	0.191599	VPS28/MVB12B	2
CC	GO:0030018	Z disc	4/177	126/19659	0.0272385	0.0272385	0.191599	OBSL1/HDAC4/PPP1R12B/ANK3	4
CC	GO:0005774	vacuolar membrane	8/177	397/19659	0.0276555	0.0276555	0.191599	UBA52/AP1S2/STX7/AP1B1/BLOC1S1/CYB561A3/ABCD1/PSEN1	8
CC	GO:0018995	host	2/177	29/19659	0.0279101	0.0279101	0.191599	UBA52/RPS27A	2
CC	GO:0043657	host cell	2/177	29/19659	0.0279101	0.0279101	0.191599	UBA52/RPS27A	2
CC	GO:0044665	MLL1/2 complex	2/177	29/19659	0.0279101	0.0279101	0.191599	LAS1L/TAF9	2
CC	GO:0071339	MLL1 complex	2/177	29/19659	0.0279101	0.0279101	0.191599	LAS1L/TAF9	2
CC	GO:0005844	polysome	3/177	73/19659	0.0281915	0.0281915	0.191599	RPL6/RPL32/RPL7	3
MF	GO:0003735	structural constituent of ribosome	10/173	200/17632	2.88117e-05	2.88117e-05	0.0124649	RPL17/RPL6/UBA52/RPL28/RPL32/RPL14/RPL34/RPL7/RPS27A/MRPL2	10
MF	GO:0045296	cadherin binding	12/173	323/17632	8.51635e-05	8.51635e-05	0.0132423	RPL6/RPL14/RPL34/STAT1/EXOC3/SNX5/EEF1D/UBAP2/SLC3A2/PKM/ANK3/PSEN1	12
MF	GO:0050839	cell adhesion molecule binding	15/173	486/17632	9.18263e-05	9.18263e-05	0.0132423	RPL6/RPL14/RPL34/STAT1/PRKCA/CXCL12/EXOC3/SNX5/EEF1D/UBAP2/SLC3A2/PKM/CX3CL1/ANK3/PSEN1	15
MF	GO:0000983	transcription factor activity, RNA polymerase II core promoter sequence-specific DNA binding	3/173	24/17632	0.00161453	0.00161453	0.138863	STAT1/RELA/TAF9	3
MF	GO:0008143	poly(A) binding	3/173	24/17632	0.00161453	0.00161453	0.138863	PPIE/TIA1/HNRNPDL	3
MF	GO:0003727	single-stranded RNA binding	5/173	90/17632	0.00192583	0.00192583	0.138863	PPIE/TIA1/HNRNPDL/ENDOV/RBM3	5
MF	GO:0070717	poly-purine tract binding	3/173	30/17632	0.00310205	0.00310205	0.179068	PPIE/TIA1/HNRNPDL	3
MF	GO:0005200	structural constituent of cytoskeleton	5/173	102/17632	0.00332251	0.00332251	0.179068	TPM1/TUBA1A/SPTB/TUBGCP3/ANK3	5
MF	GO:0030955	potassium ion binding	2/173	10/17632	0.00409007	0.00409007	0.179068	HDAC4/PKM	2
MF	GO:0009931	calcium-dependent protein serine/threonine kinase activity	2/173	11/17632	0.00496685	0.00496685	0.179068	PRKCA/MAPKAPK2	2
MF	GO:0031386	protein tag	2/173	11/17632	0.00496685	0.00496685	0.179068	UBA52/RPS27A	2
MF	GO:0045236	CXCR chemokine receptor binding	2/173	11/17632	0.00496685	0.00496685	0.179068	CXCL12/CX3CL1	2
MF	GO:0010857	calcium-dependent protein kinase activity	2/173	12/17632	0.00592195	0.00592195	0.1914	PRKCA/MAPKAPK2	2
MF	GO:0042805	actinin binding	3/173	39/17632	0.00654711	0.00654711	0.1914	RELA/OBSL1/RARA	3
MF	GO:0033613	activating transcription factor binding	4/173	76/17632	0.00663611	0.00663611	0.1914	FOS/RELA/TAF9/HDAC4	4
